# Supplementary material for: Nicotinonitrile-Based Dual Inhibitors of Tubulin and Topoisomerase II: Design, Synthesis, and Anticancer Evaluation
Source: Research Square preprint supplement (doi:10.21203/rs.3.rs-7890915/v1), 2025-11-11
Supplement: Supplementary file 1 [file 2a047ca5f9f903b002f47f05.docx]

**Supplementary information**

**Nicotinonitrile-Based Dual Inhibitors of Tubulin and Topoisomerase II: Design, Synthesis, and Anticancer Evaluation**

Eman Samir1,3, Abdalla E. A. Hassan1,2, Shaikha Alneyadi4, Yassir S. Raouf4, Hanem M. Awad5, Zakaria K.M. Abdel-Samii3, Amany M.M. Al-Mahmoudy3, Reham A. Abou-elkhair1,2.

1Applied Nucleic Acids Research center, Zagazig University, Zagazig Egypt. 2Department of Chemistry, Faculty of Science, Zagazig University, Zagazig, Egypt. 3Department of Pharmaceutical Organic Chemistry, Faculty of Pharmacy, Zagazig University, Zagazig, Egypt. 4Department of Chemistry, College of Science, United Arab Emirates University, P.O. Box 15551, Al Ain, UAE. 5National Research Center, Tanning Materials & Proteins Department, Dokki, Giza 12622, Egypt.

**NMR spectra**


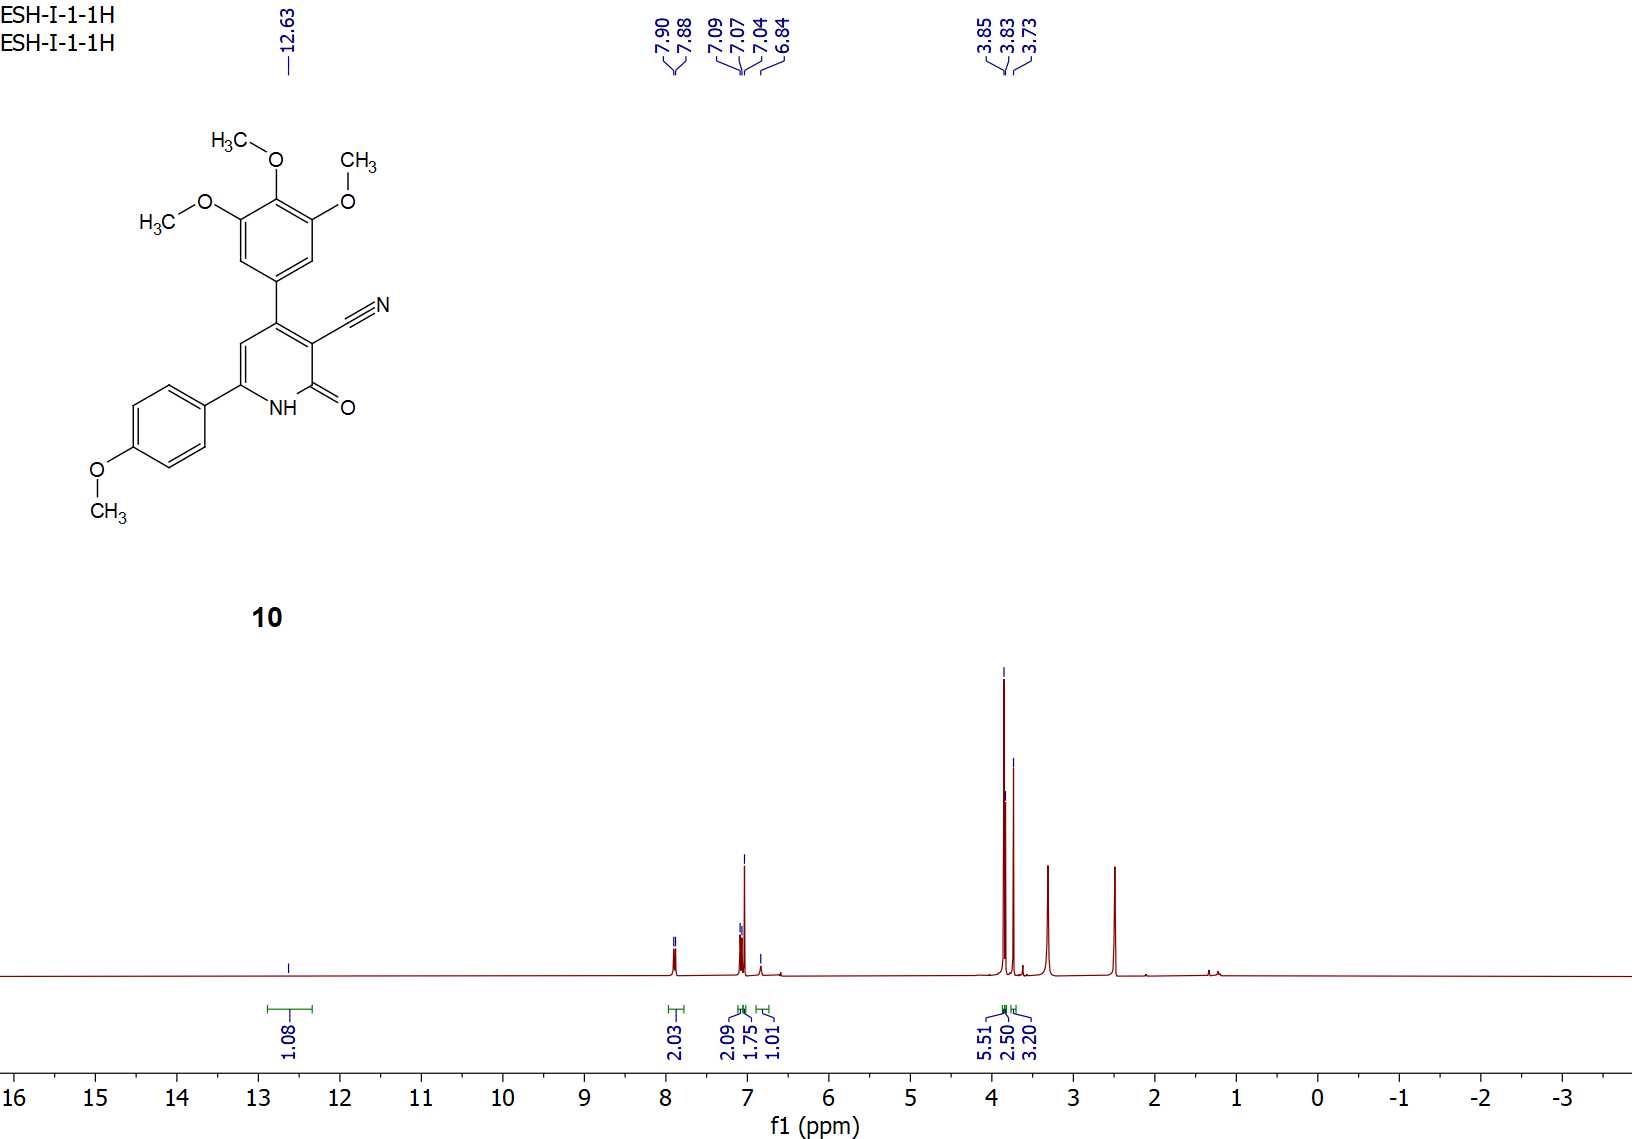


**Figure S1:** 1H-NMR spectrum of compound 10.


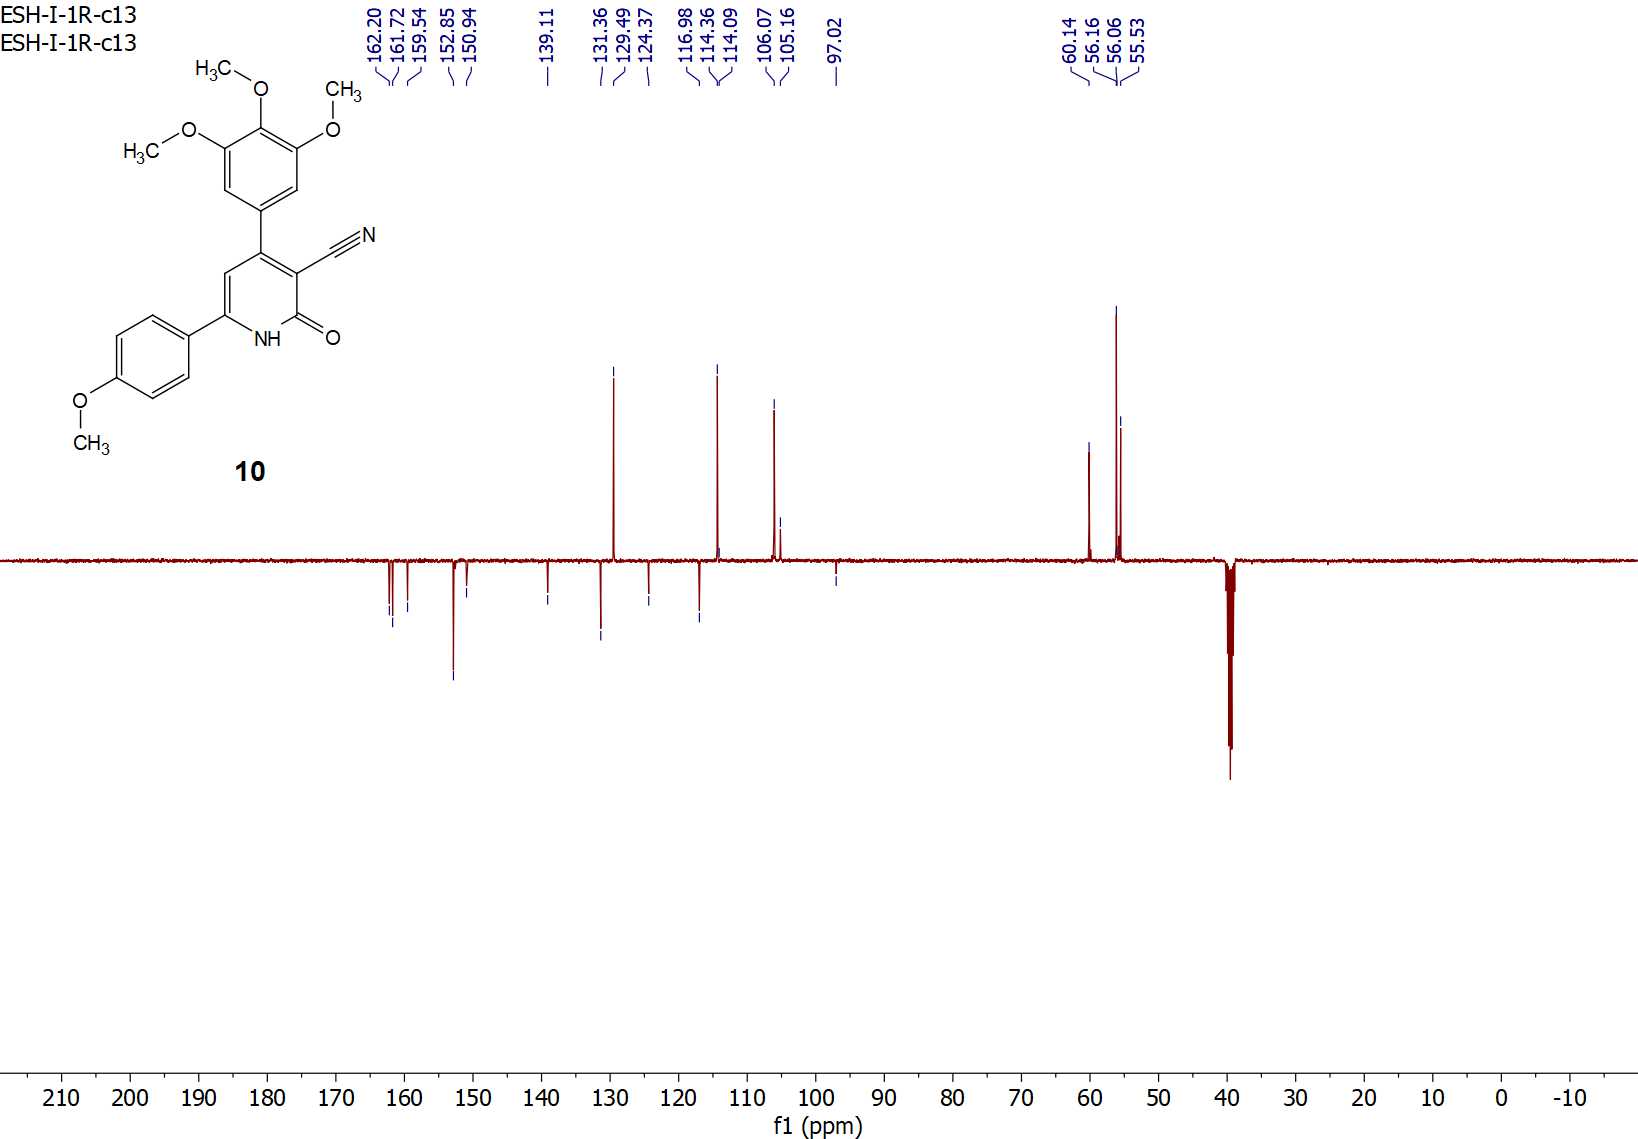


**Figure S2:** 13C-APT NMR spectrum of compound 10.

**
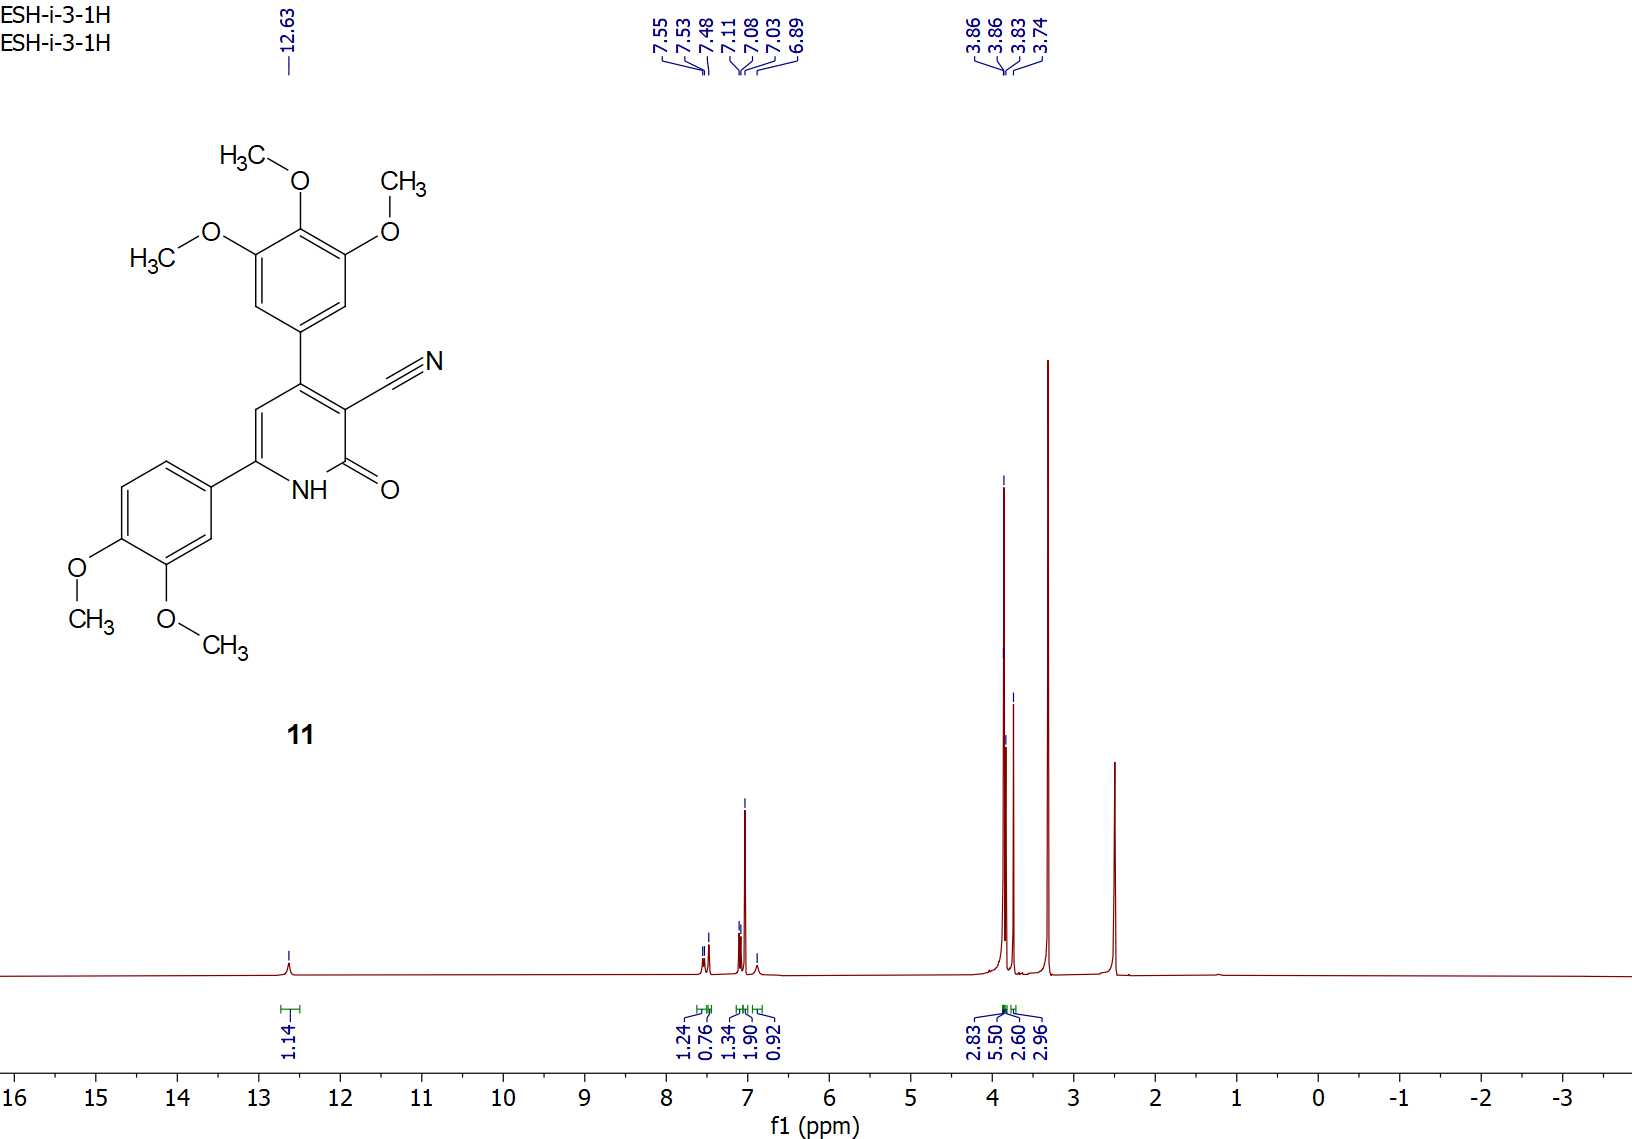
**

**Figure S3:** 1H-NMR spectrum of compound 11.


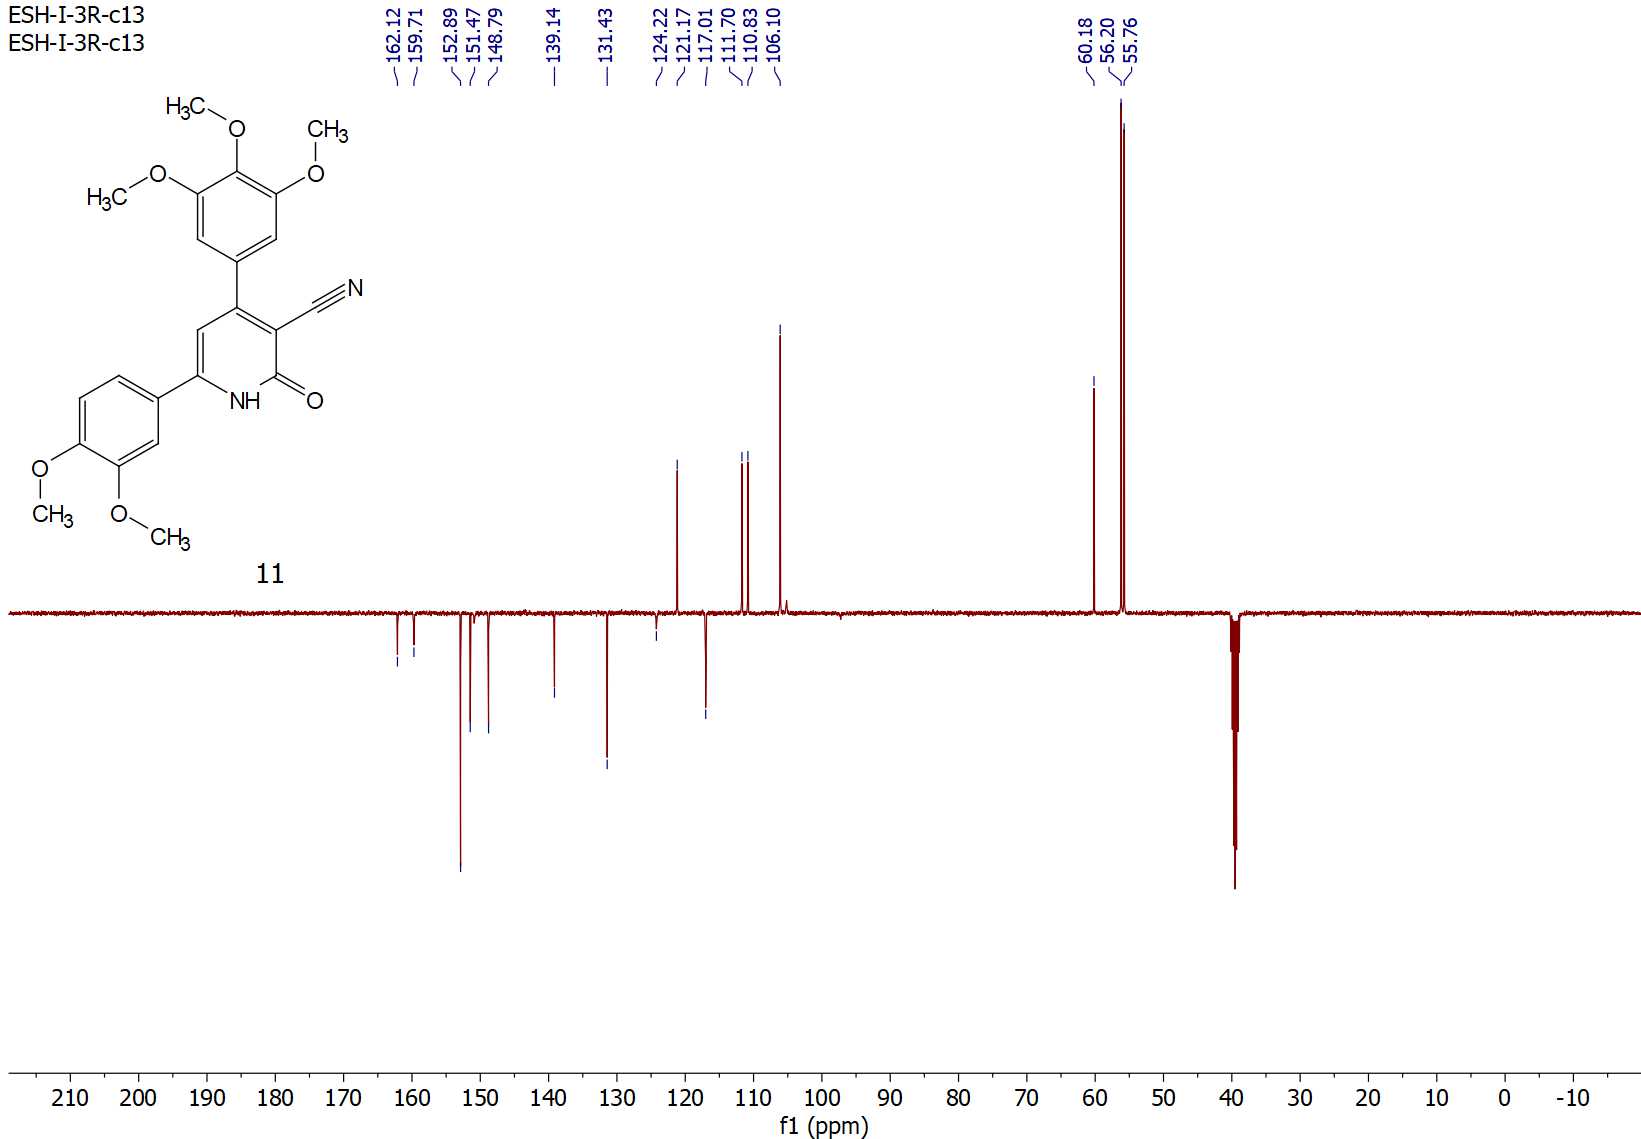


**Figure S4:** 13C-APT NMR spectrum of compound 11.


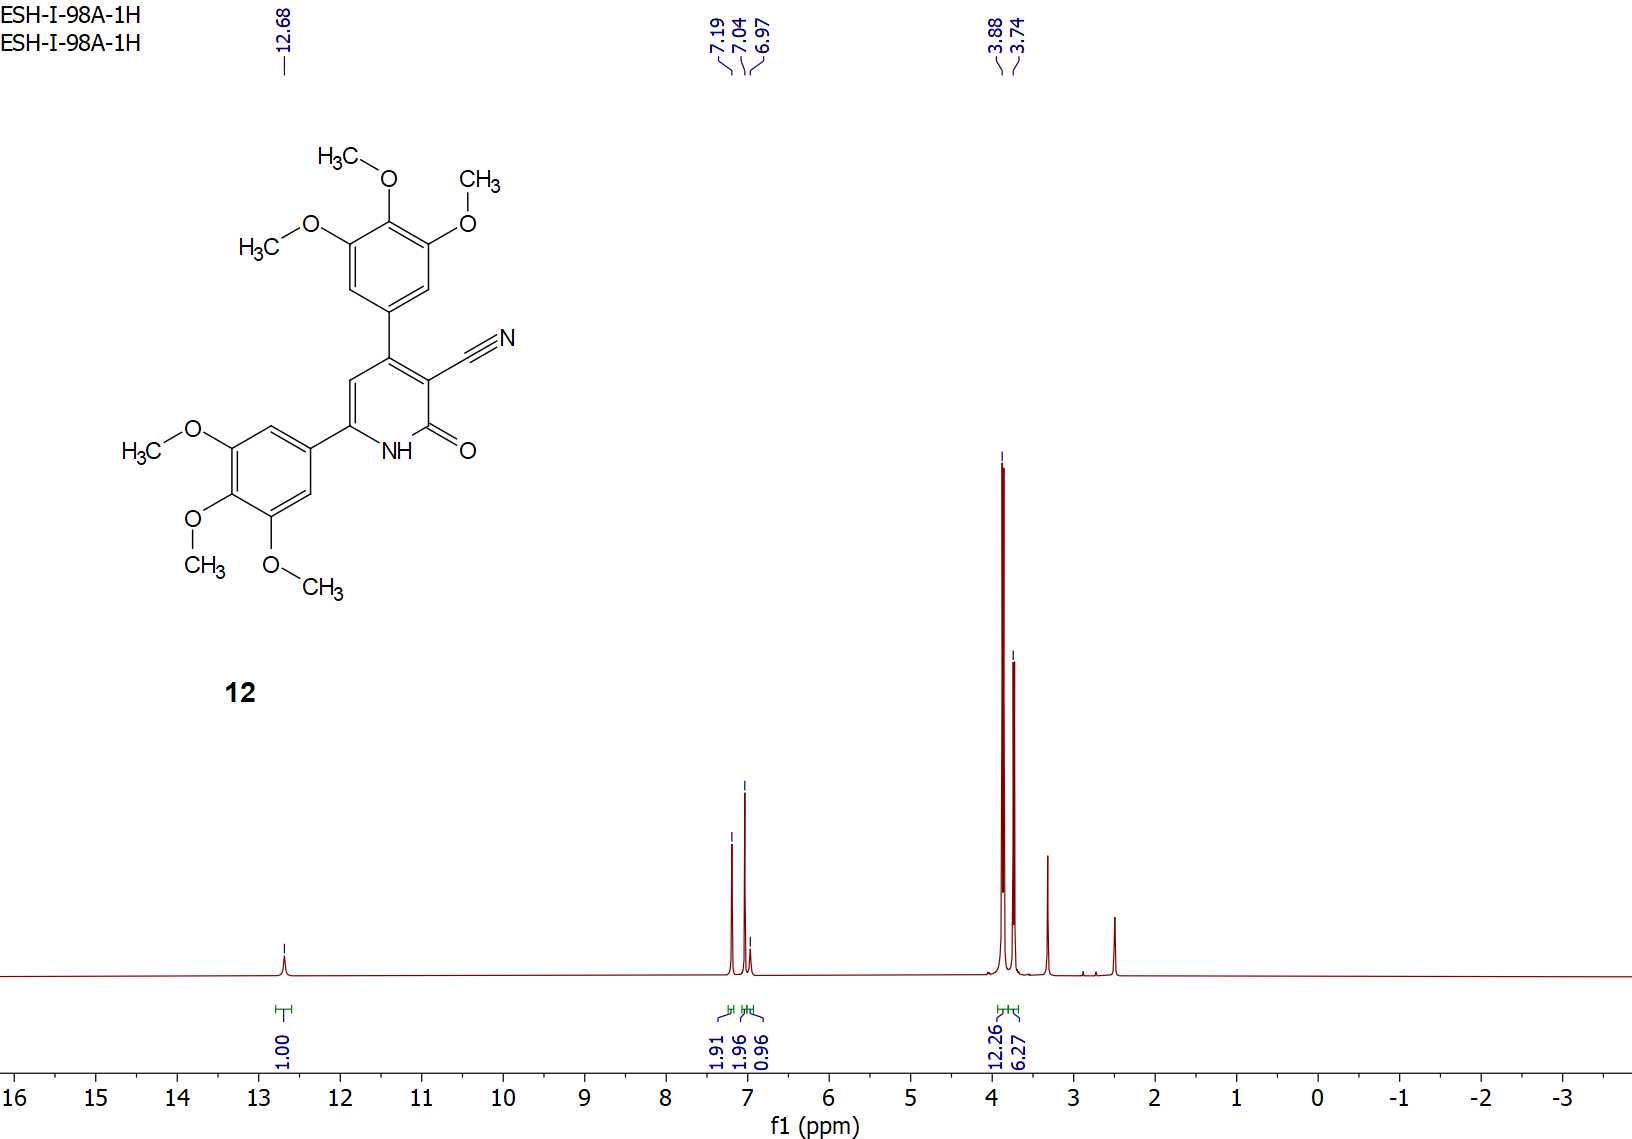


**Figure S5:** 1H-NMR spectrum of compound 12.


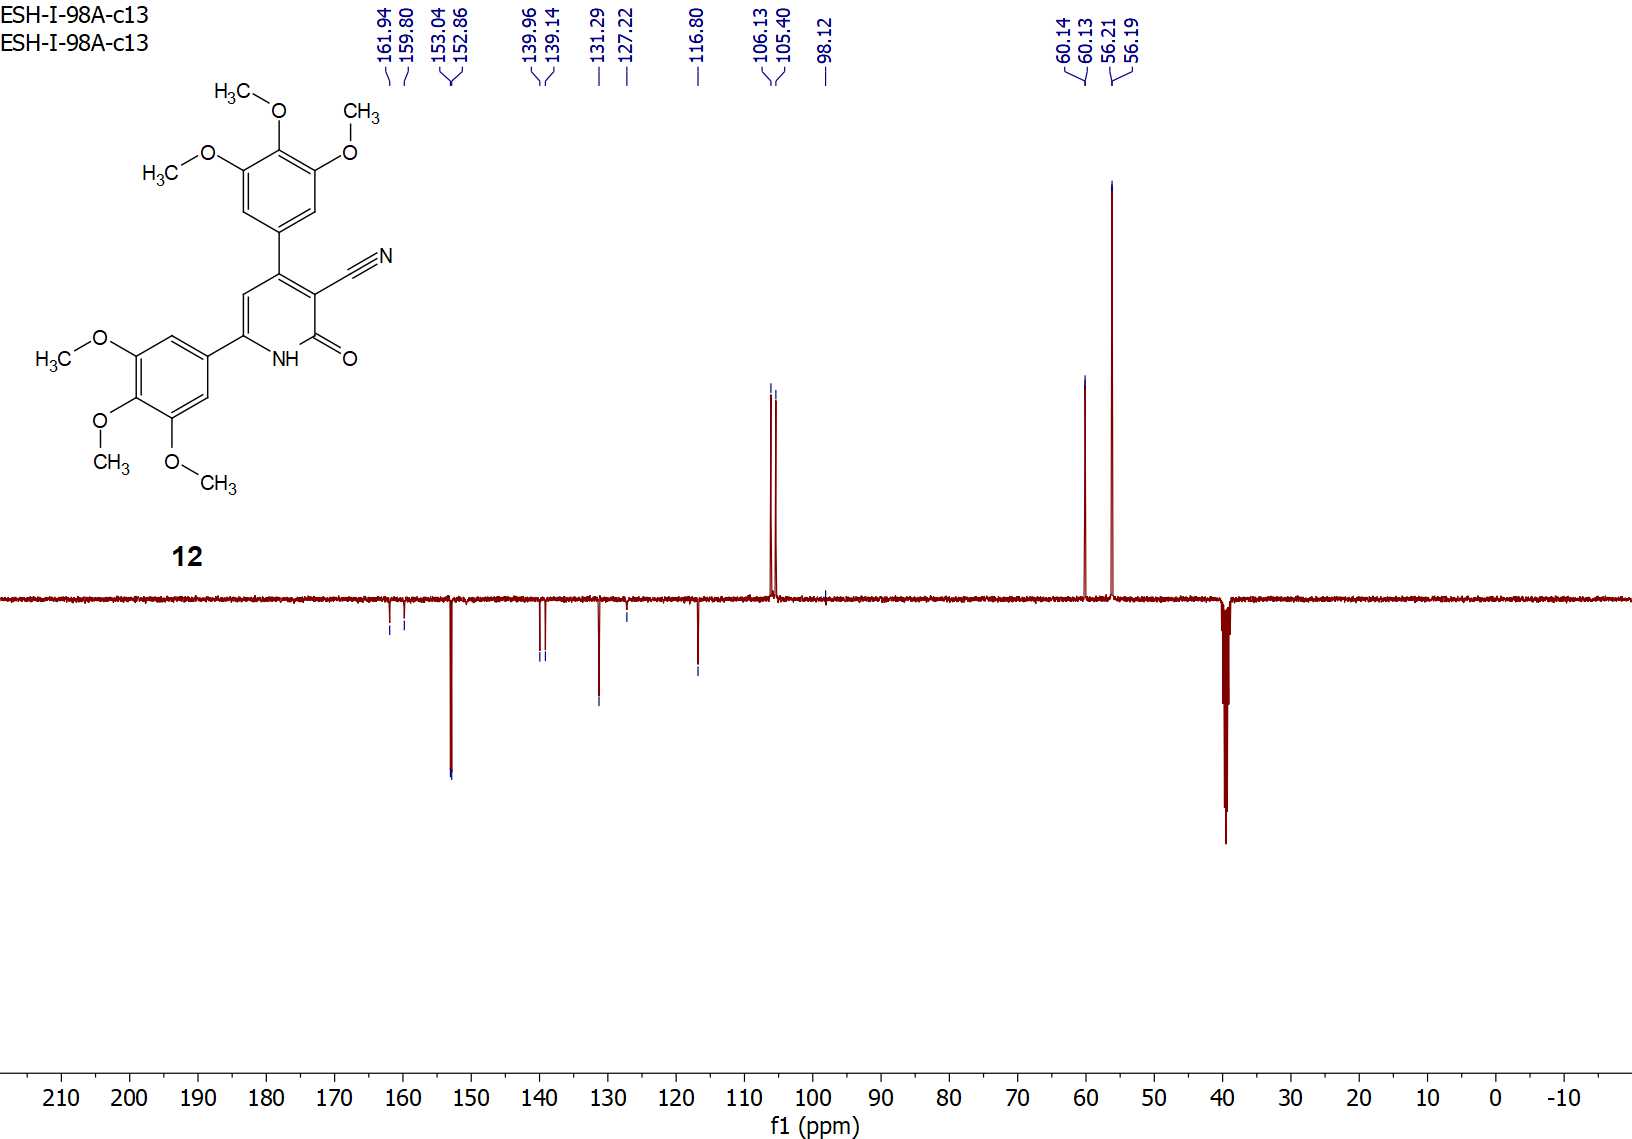


**Figure S6:** 13C-APT NMR spectrum of compound 12.


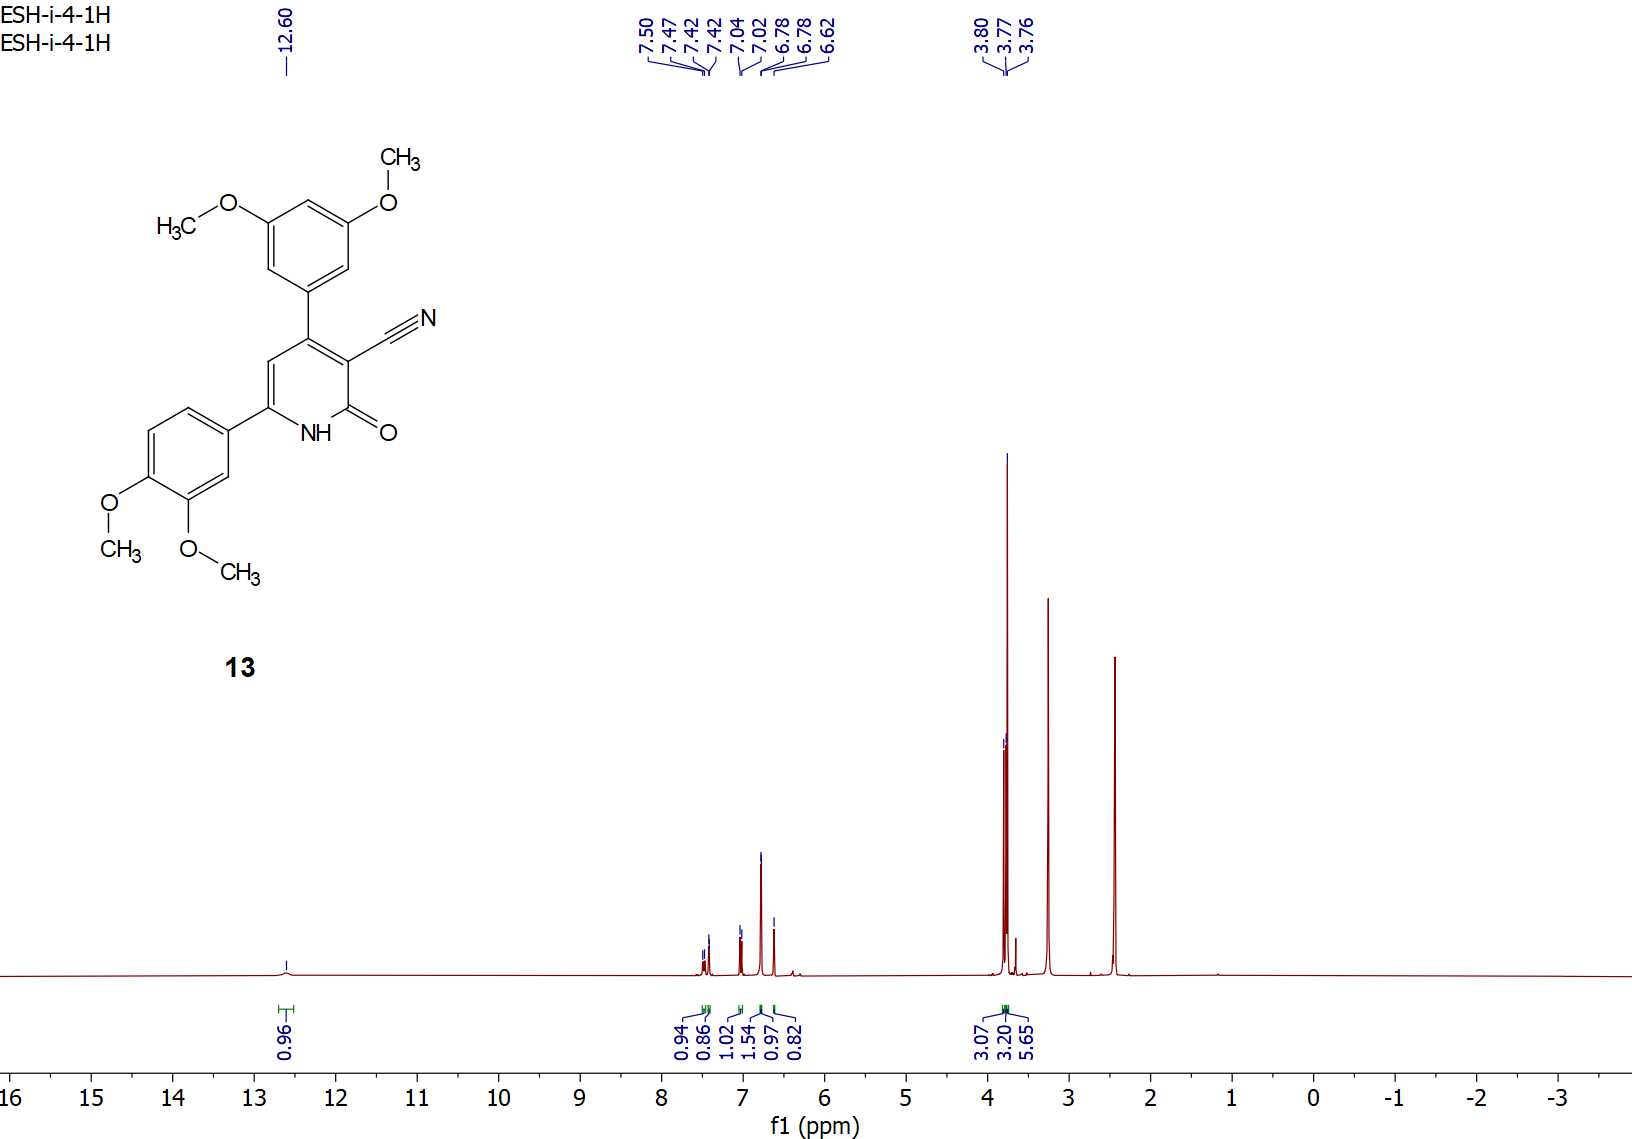


**Figure S7:** 1H-NMR spectrum of compound 13.


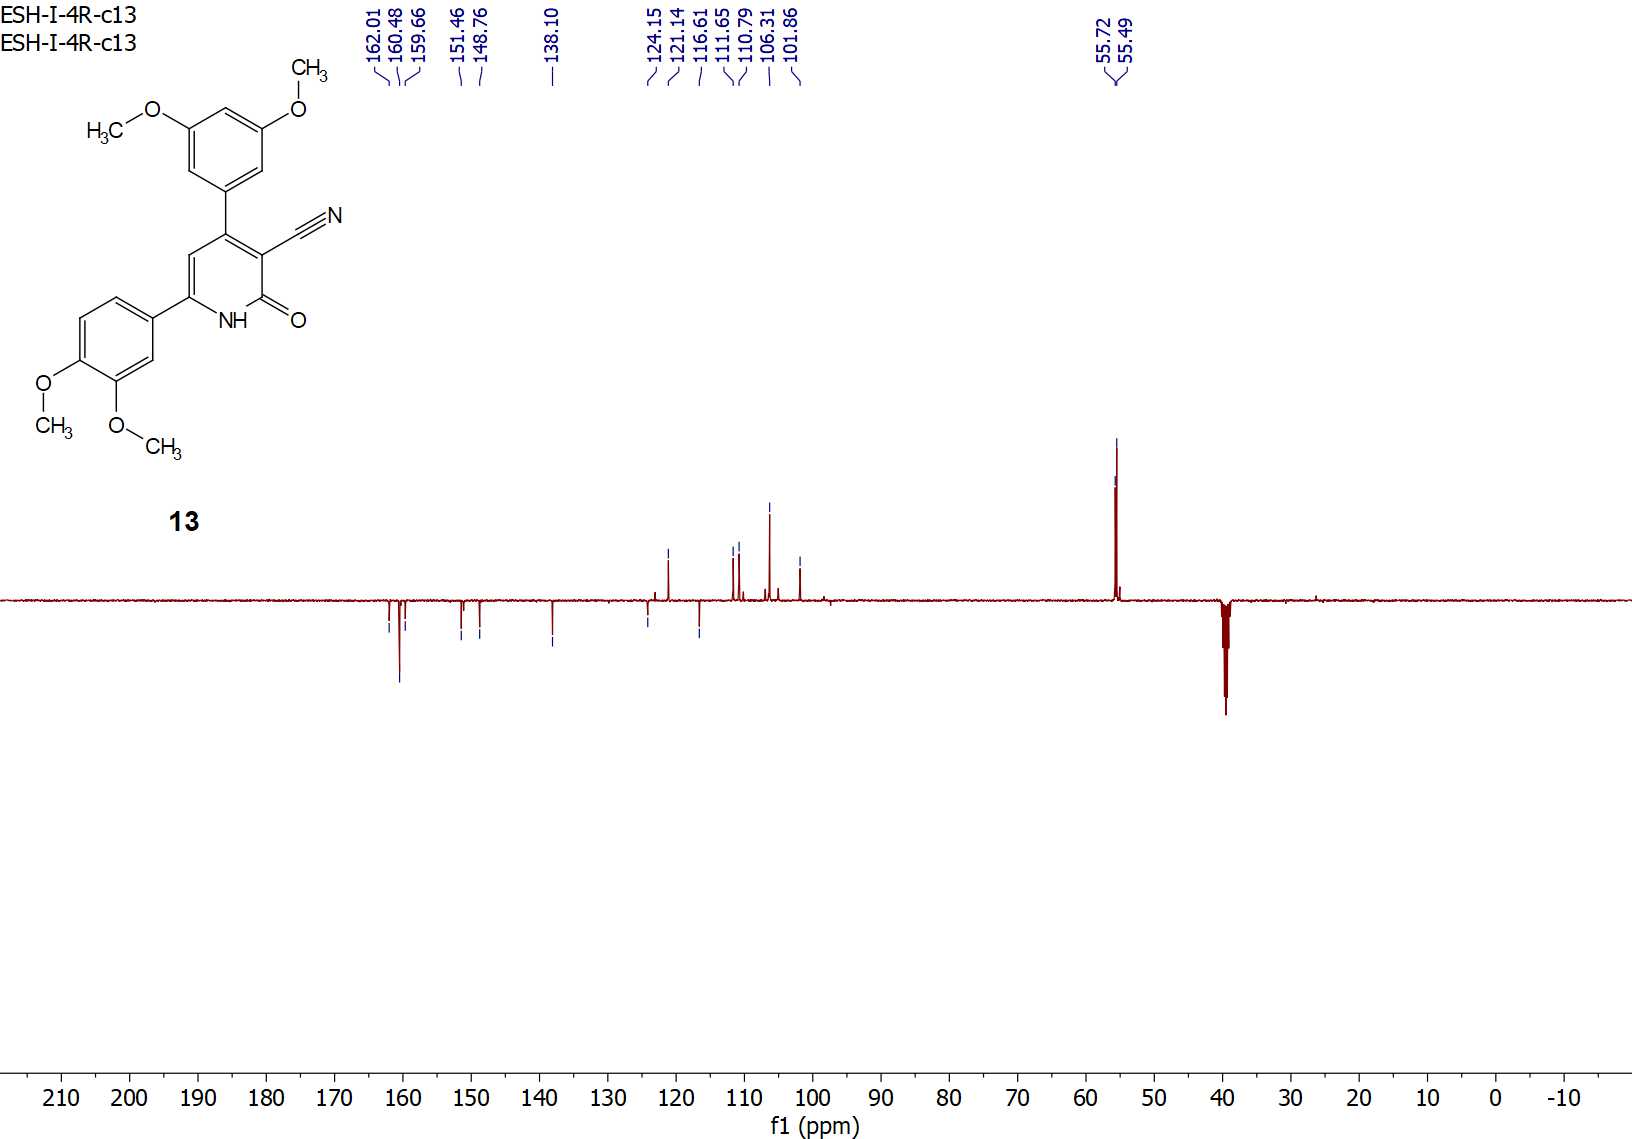


**Figure S8:** 13C-APT NMR spectrum of compound 13.


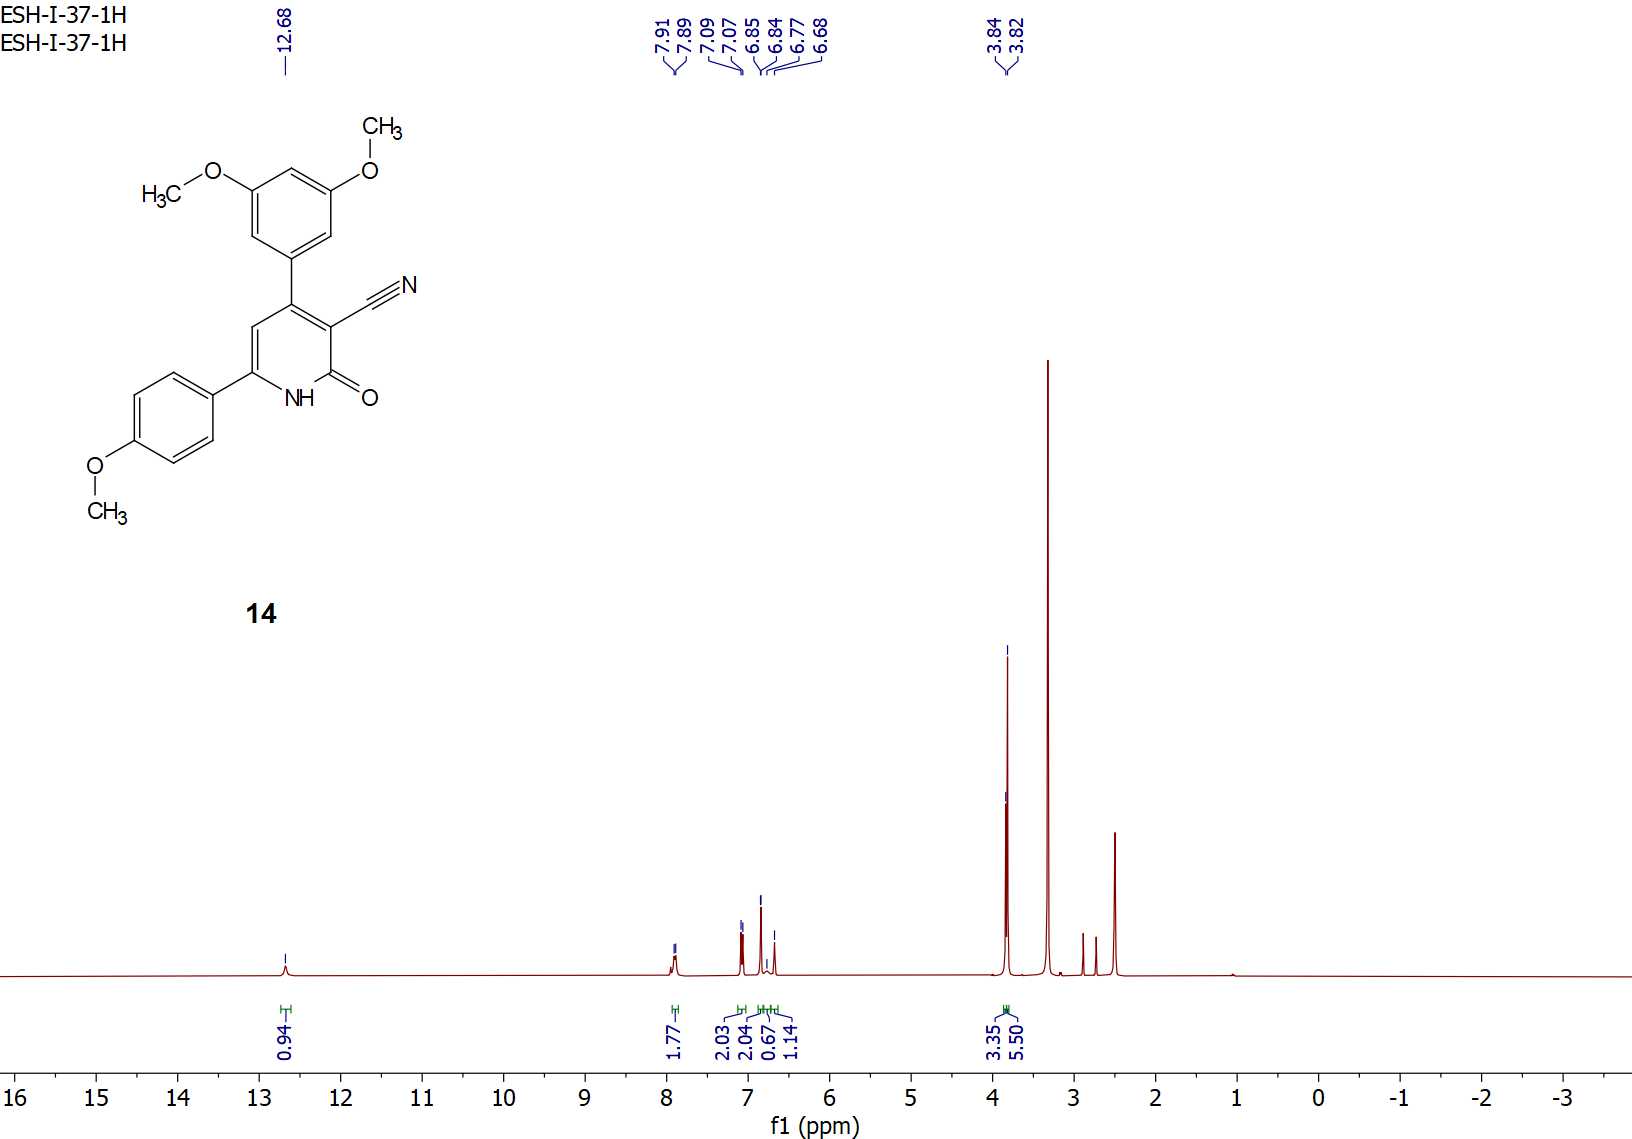


**Figure S9:** 1H-NMR spectrum of compound 14.


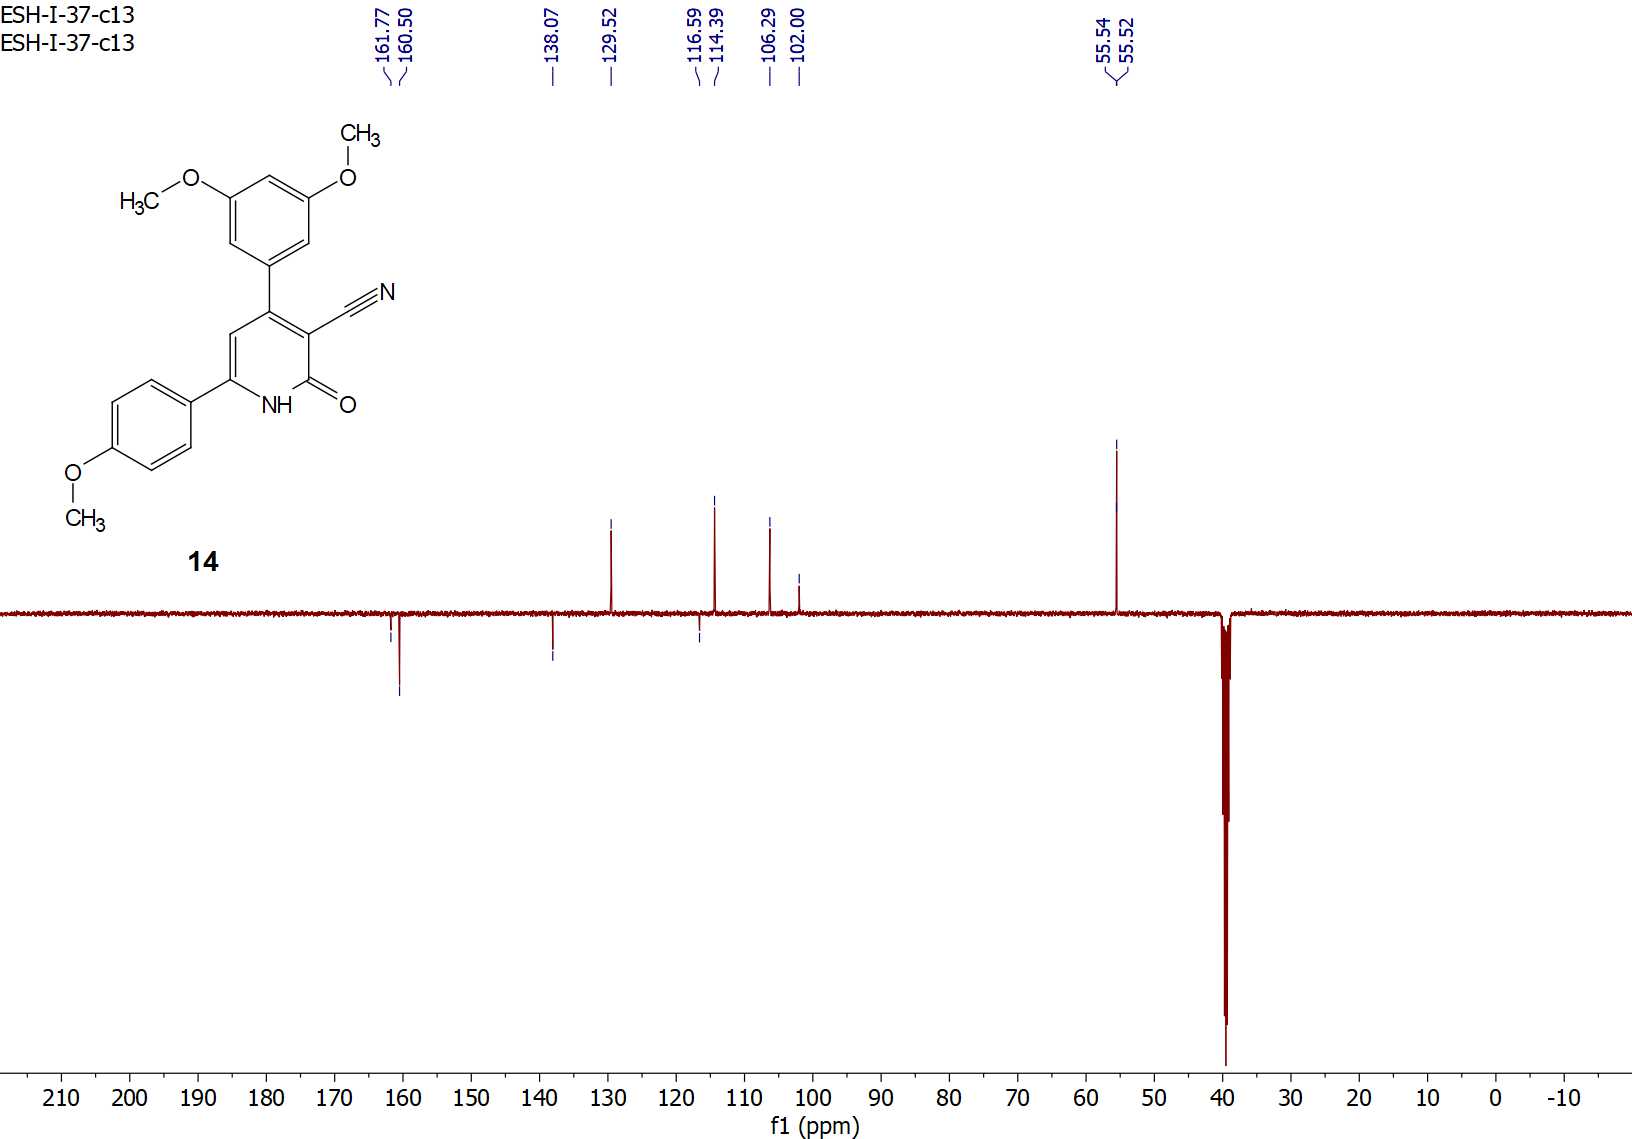


**Figure S10:** 13C-APT NMR spectrum of compound 14.


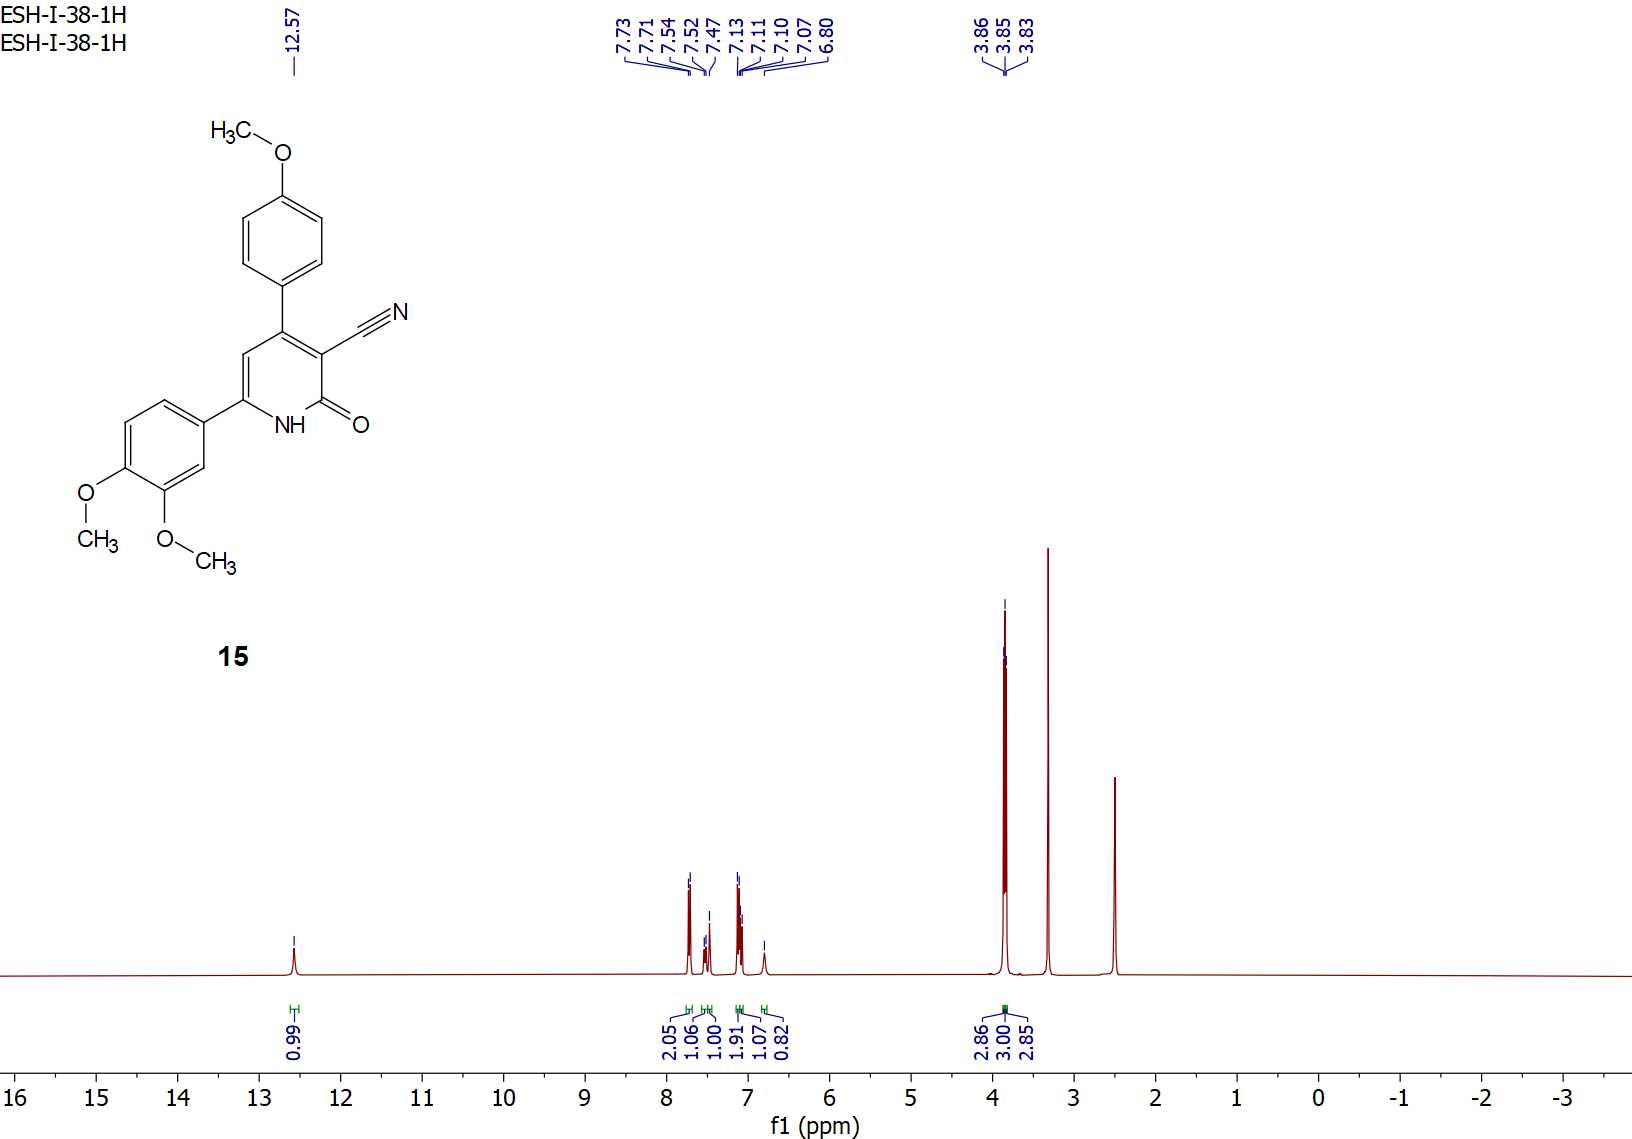


**Figure S11:** 1H-NMR spectrum of compound 15.


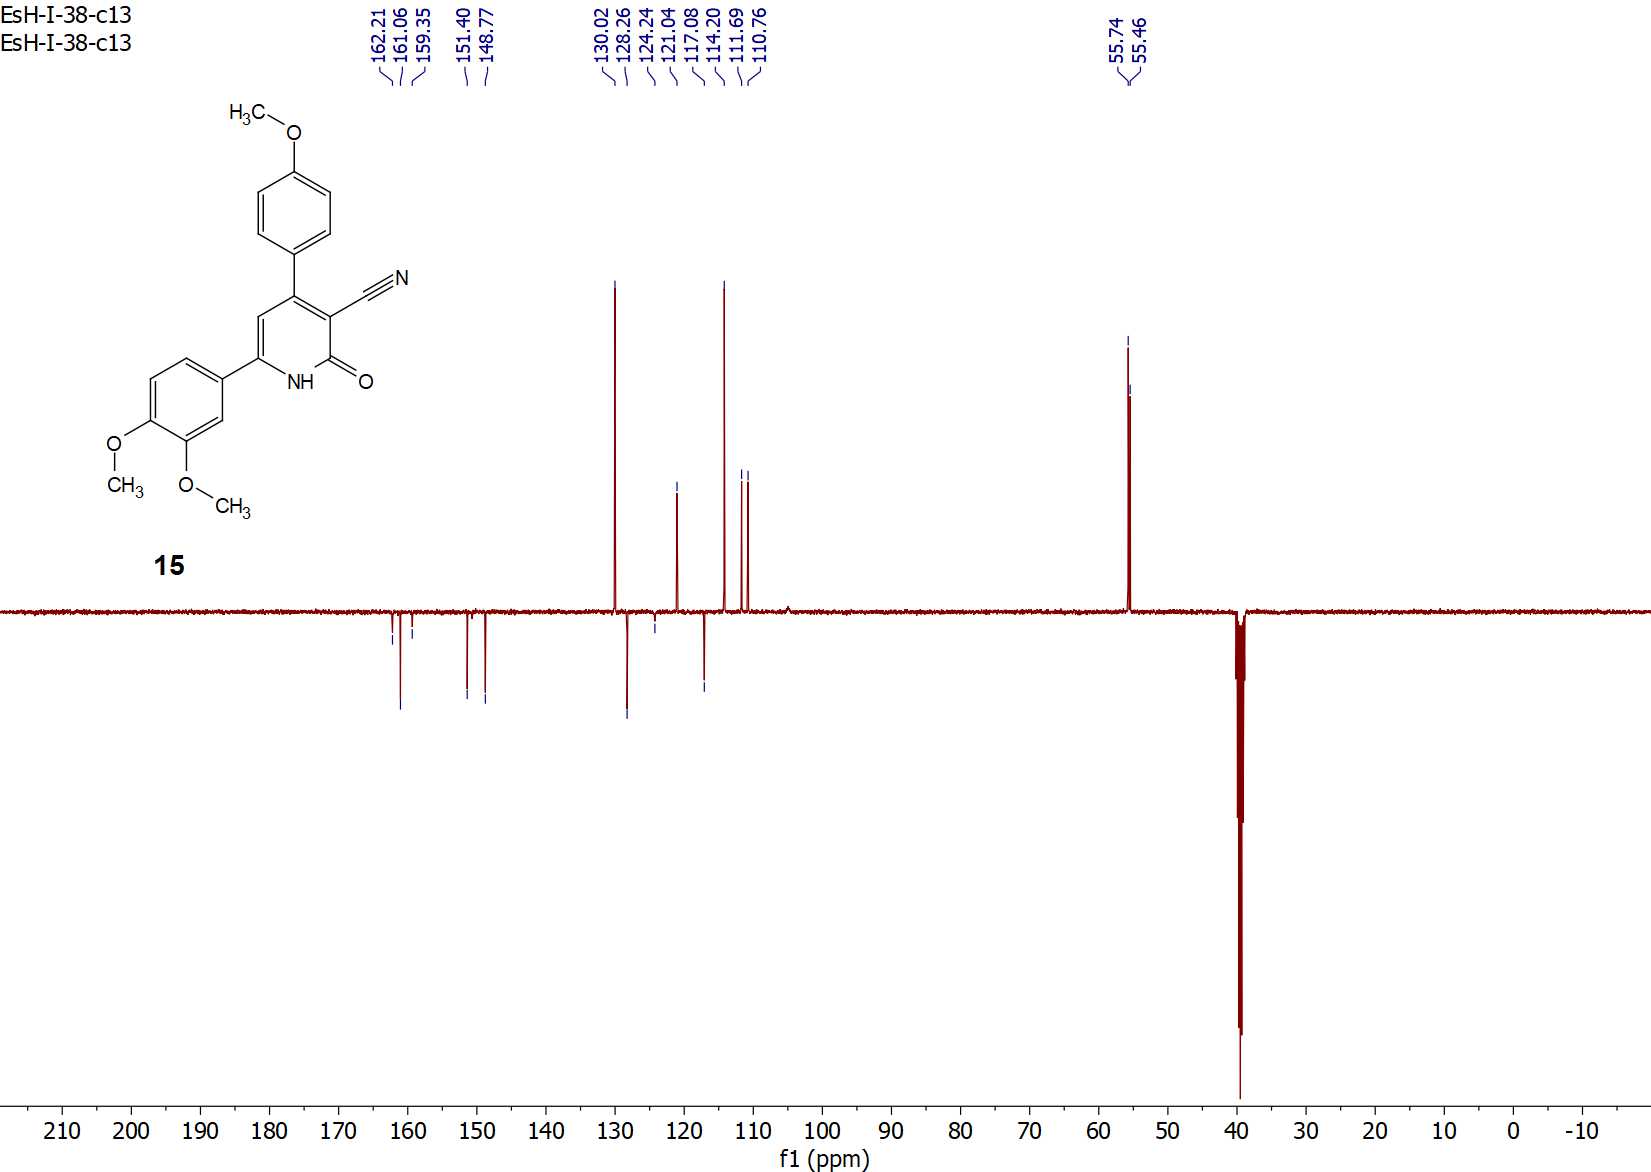


**Figure S12:** 13C-APT NMR spectrum of compound 15.


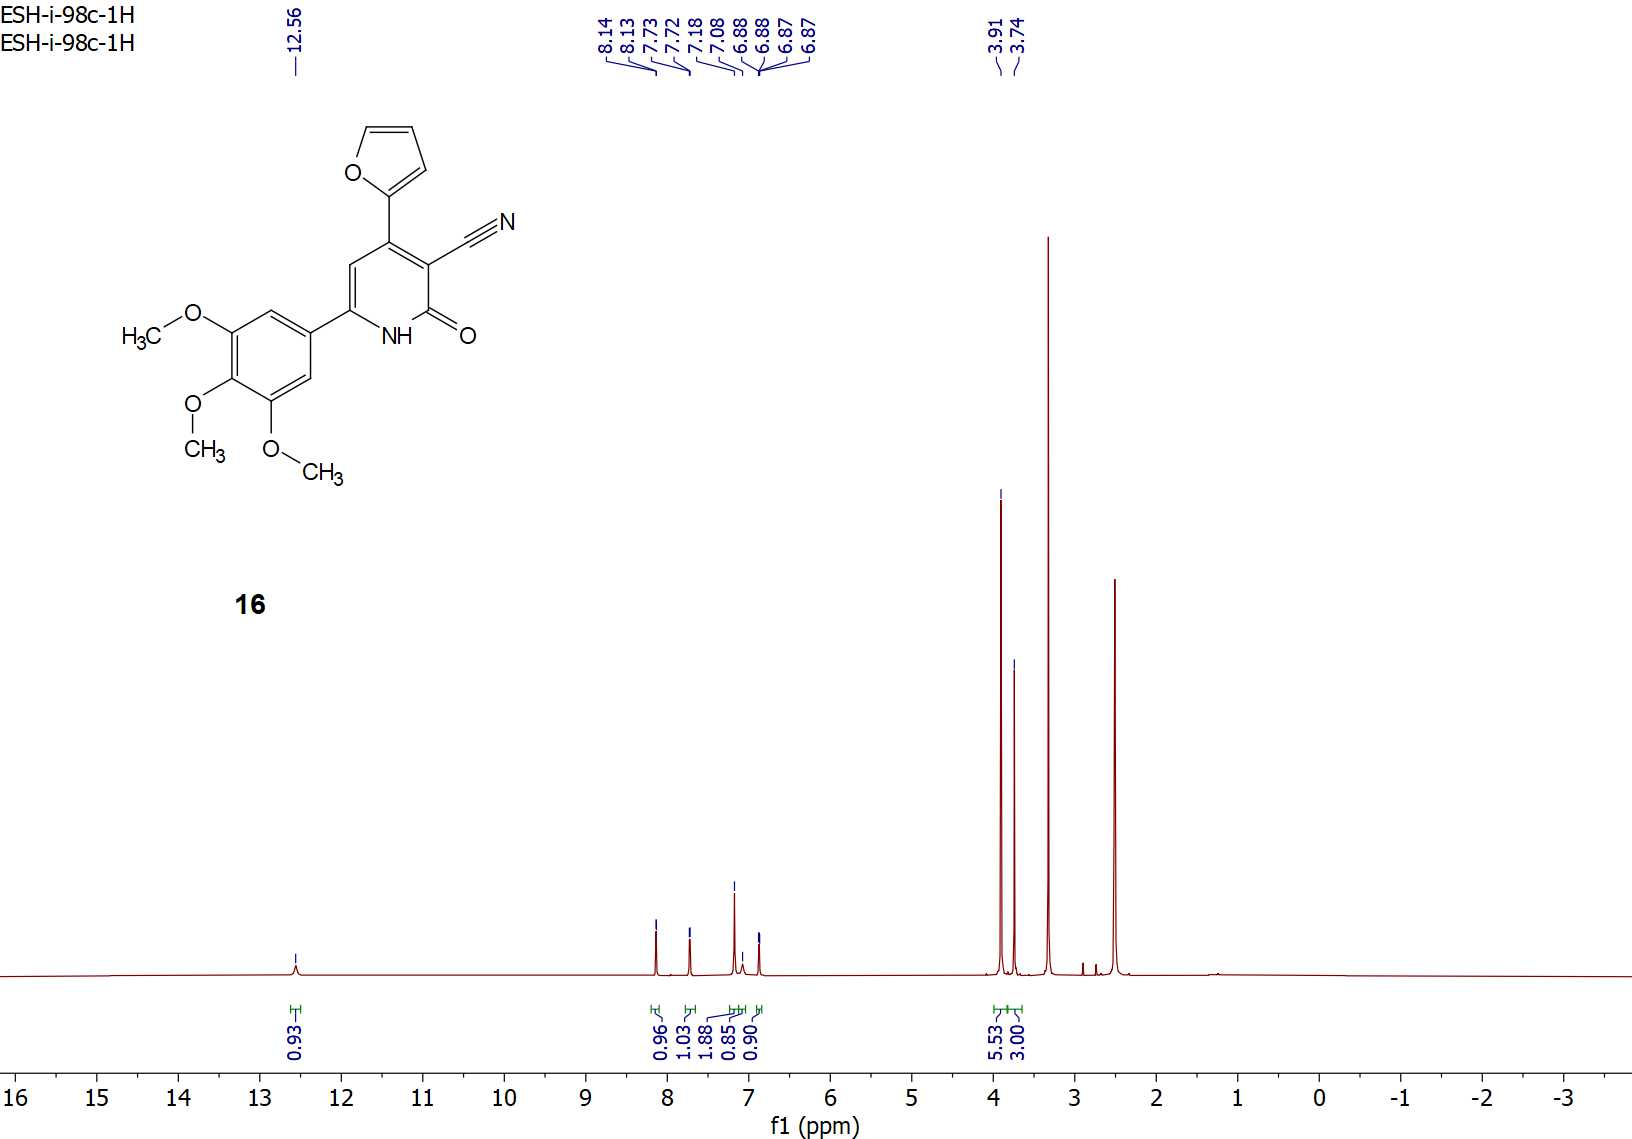


**Figure S13:** 1H-NMR spectrum of compound 16.


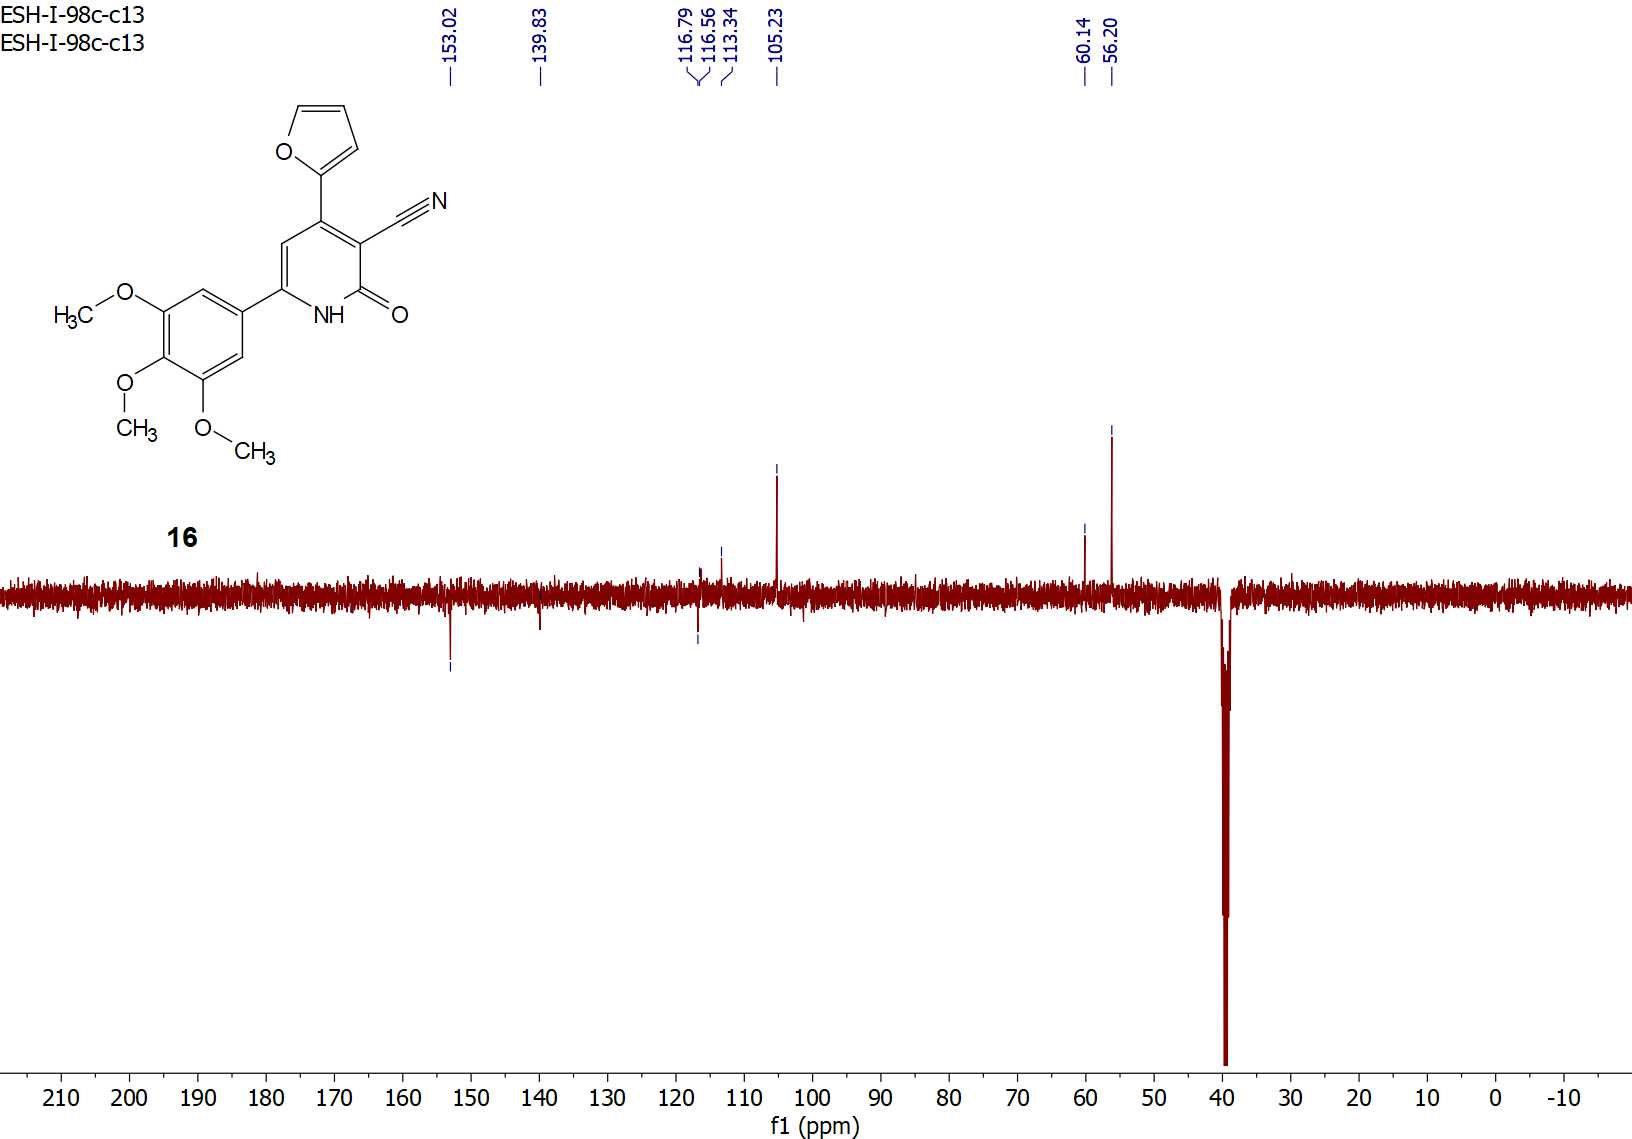


**Figure S14:** 13C-APT NMR spectrum of compound 16.


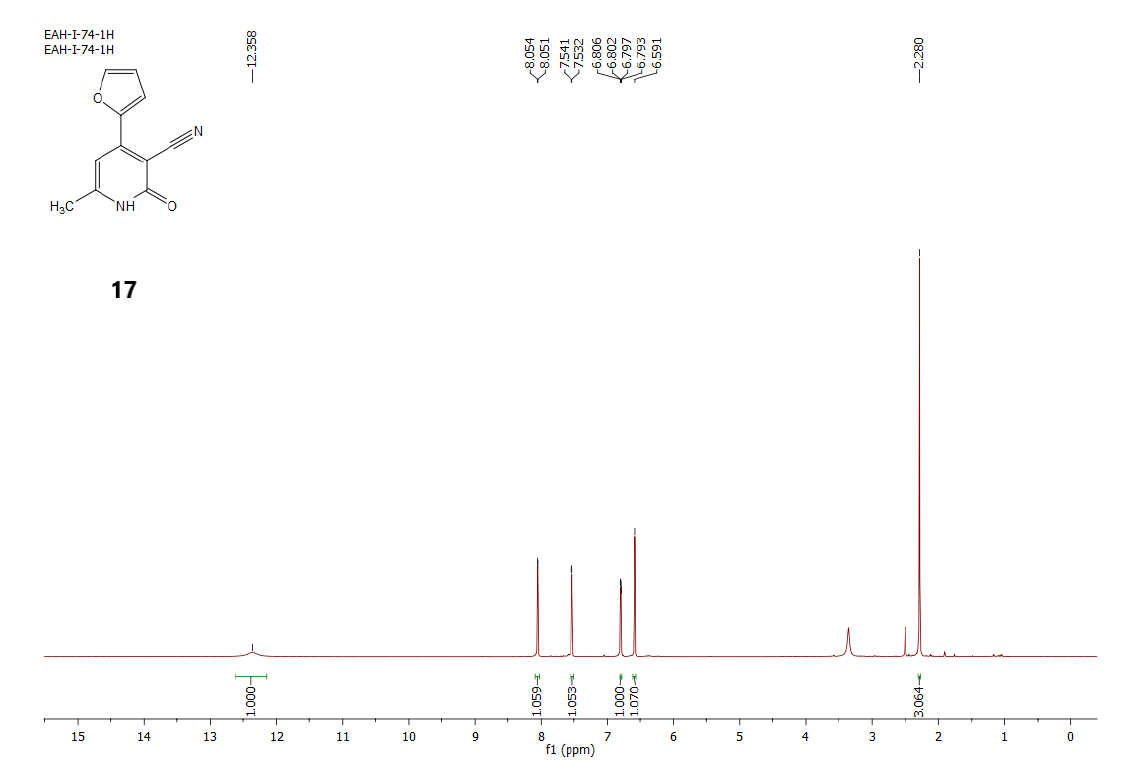


**Figure S15:** 1H-NMR spectrum of compound 17.


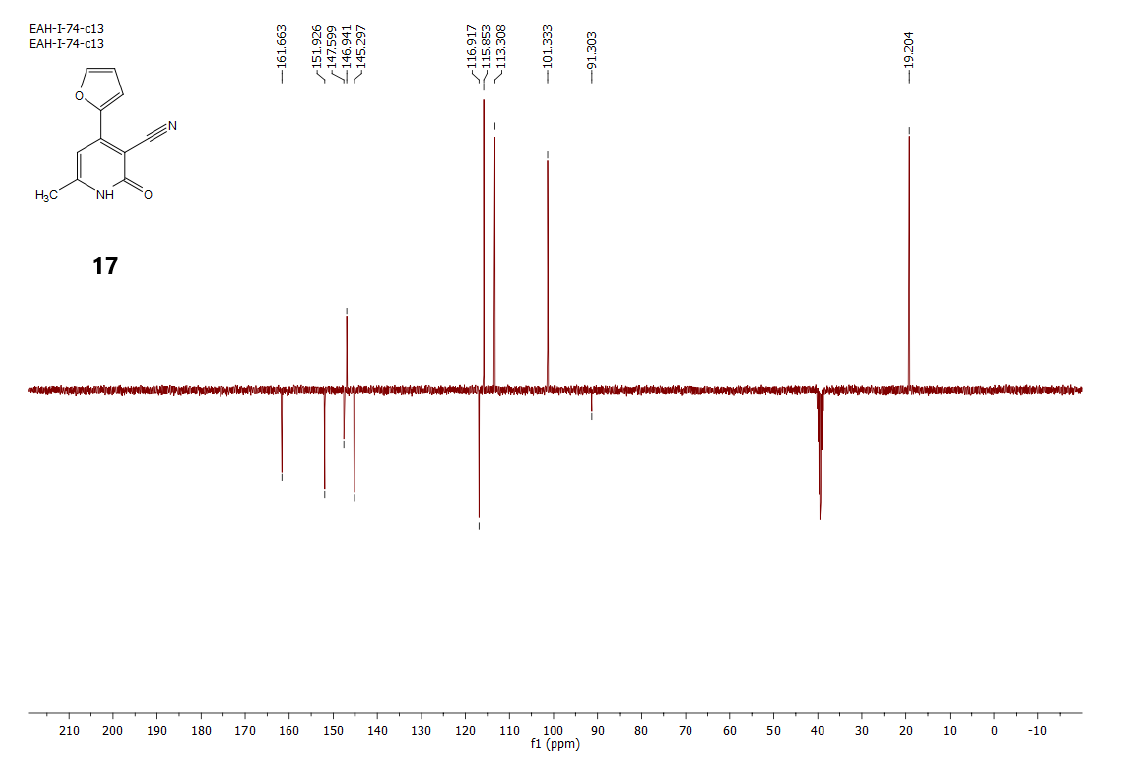


**Figure S16:** 13C-APT NMR spectrum of compound 17.


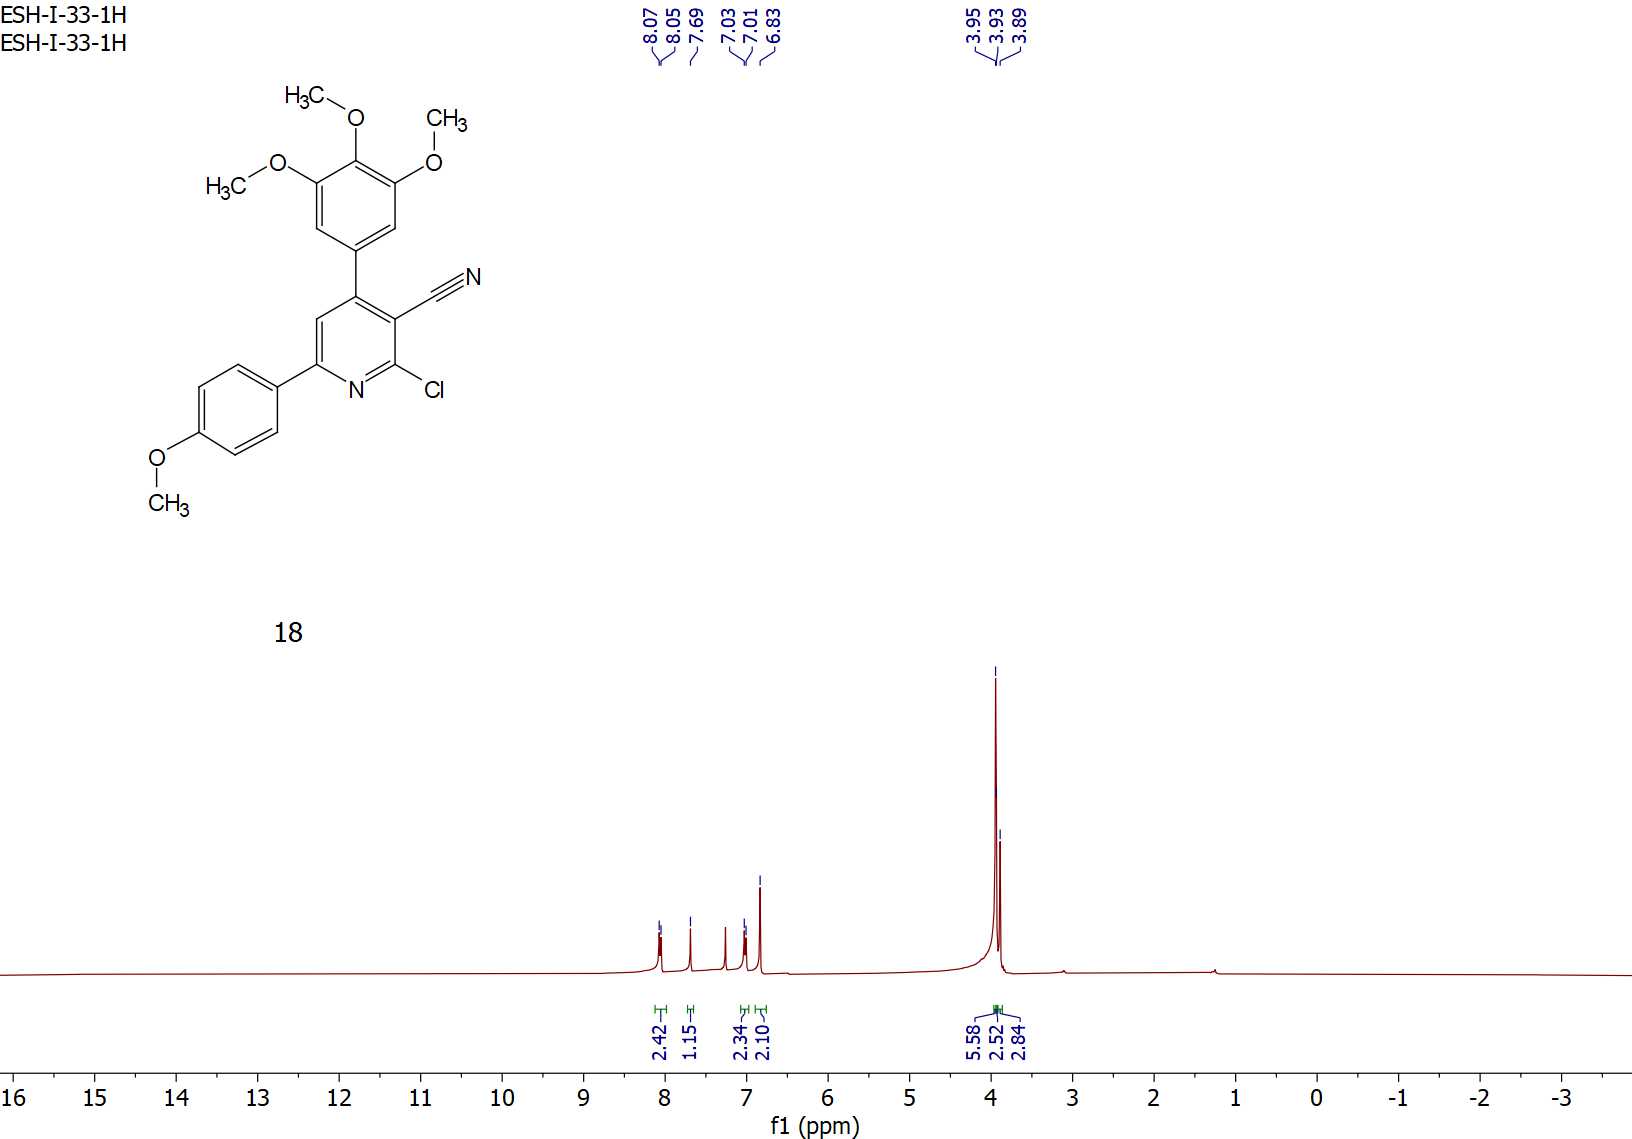


**Figure S17:** 1H-NMR spectrum of compound 18.


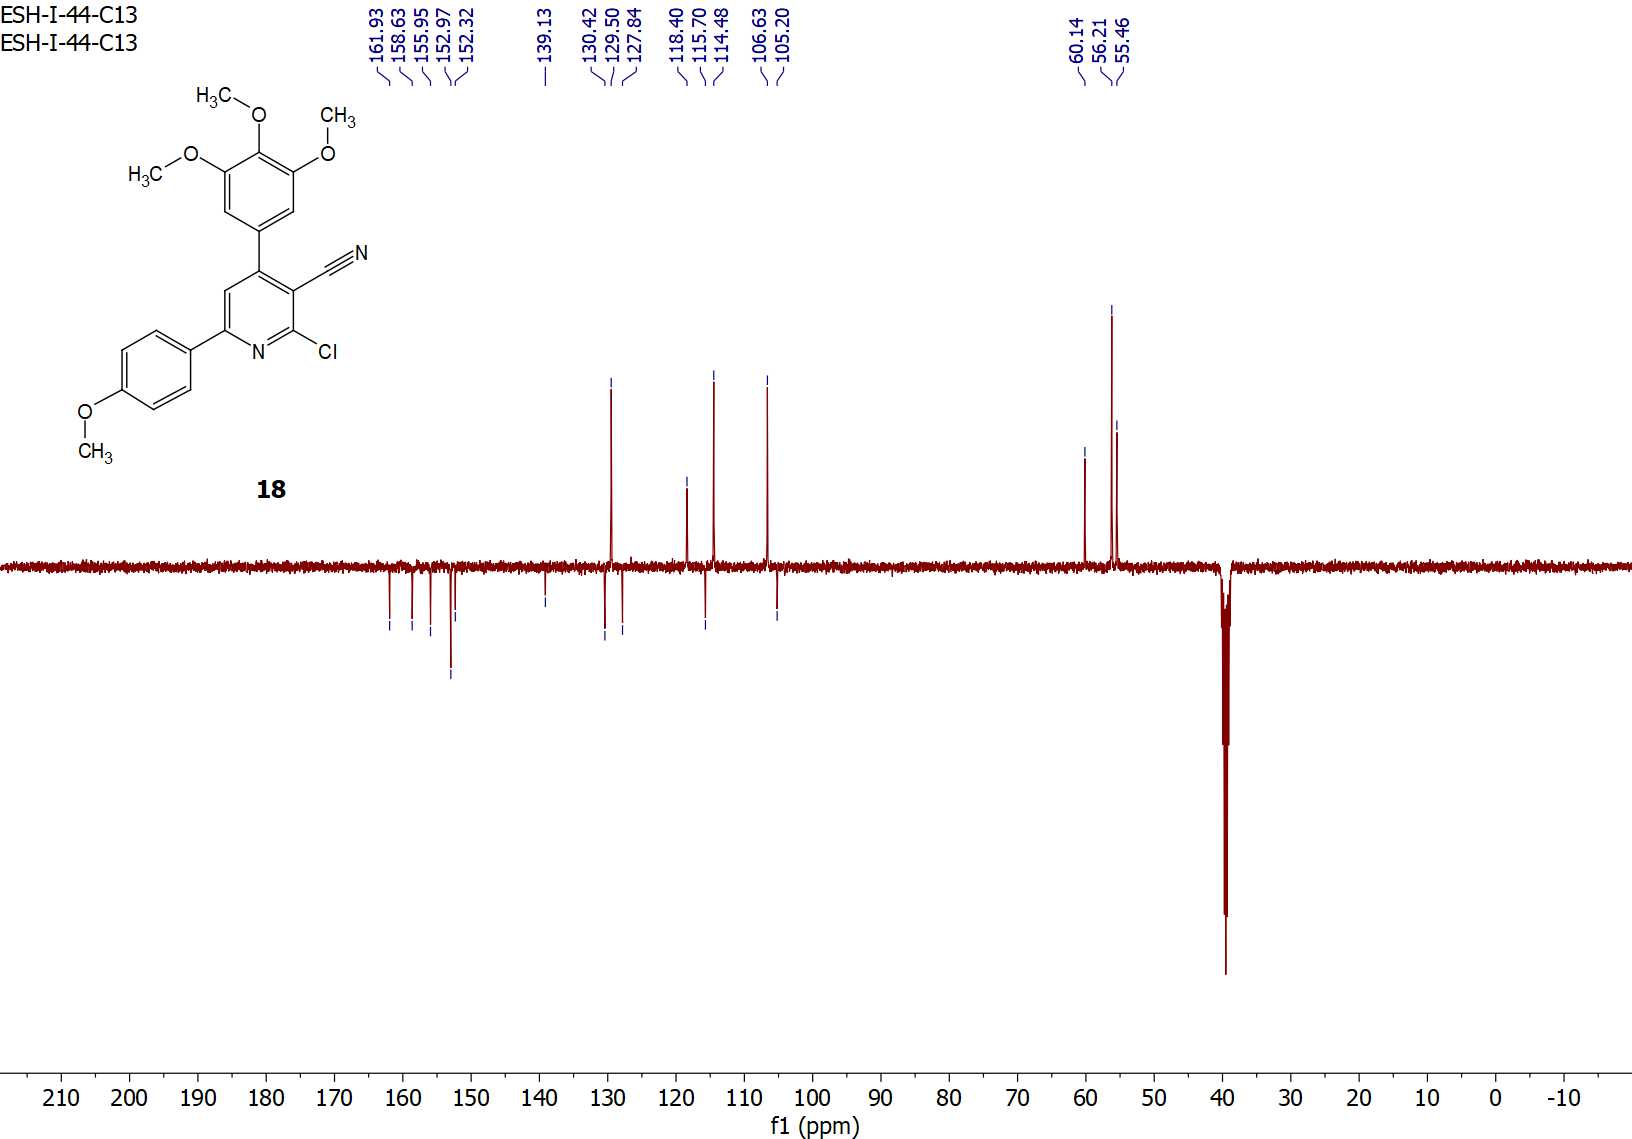


**Figure S18:** 13C-APT NMR spectrum of compound 18.


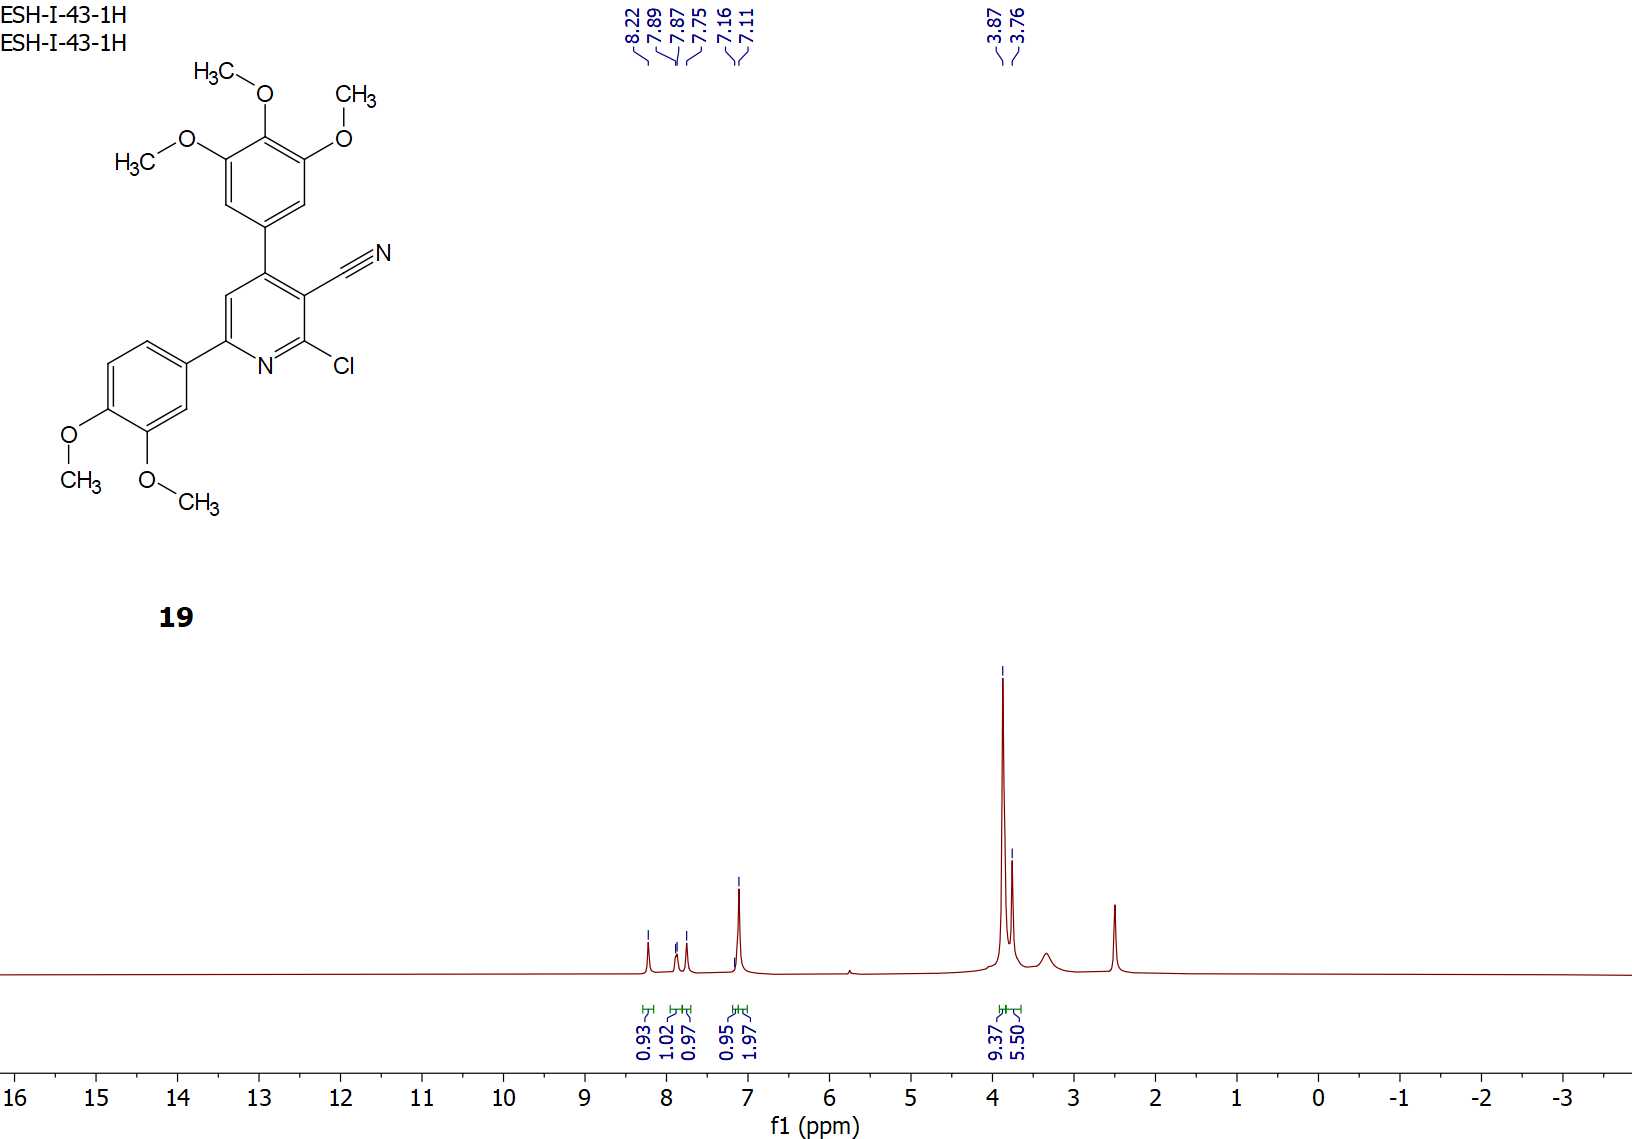


**Figure S19:** 1H-NMR spectrum of compound 19.


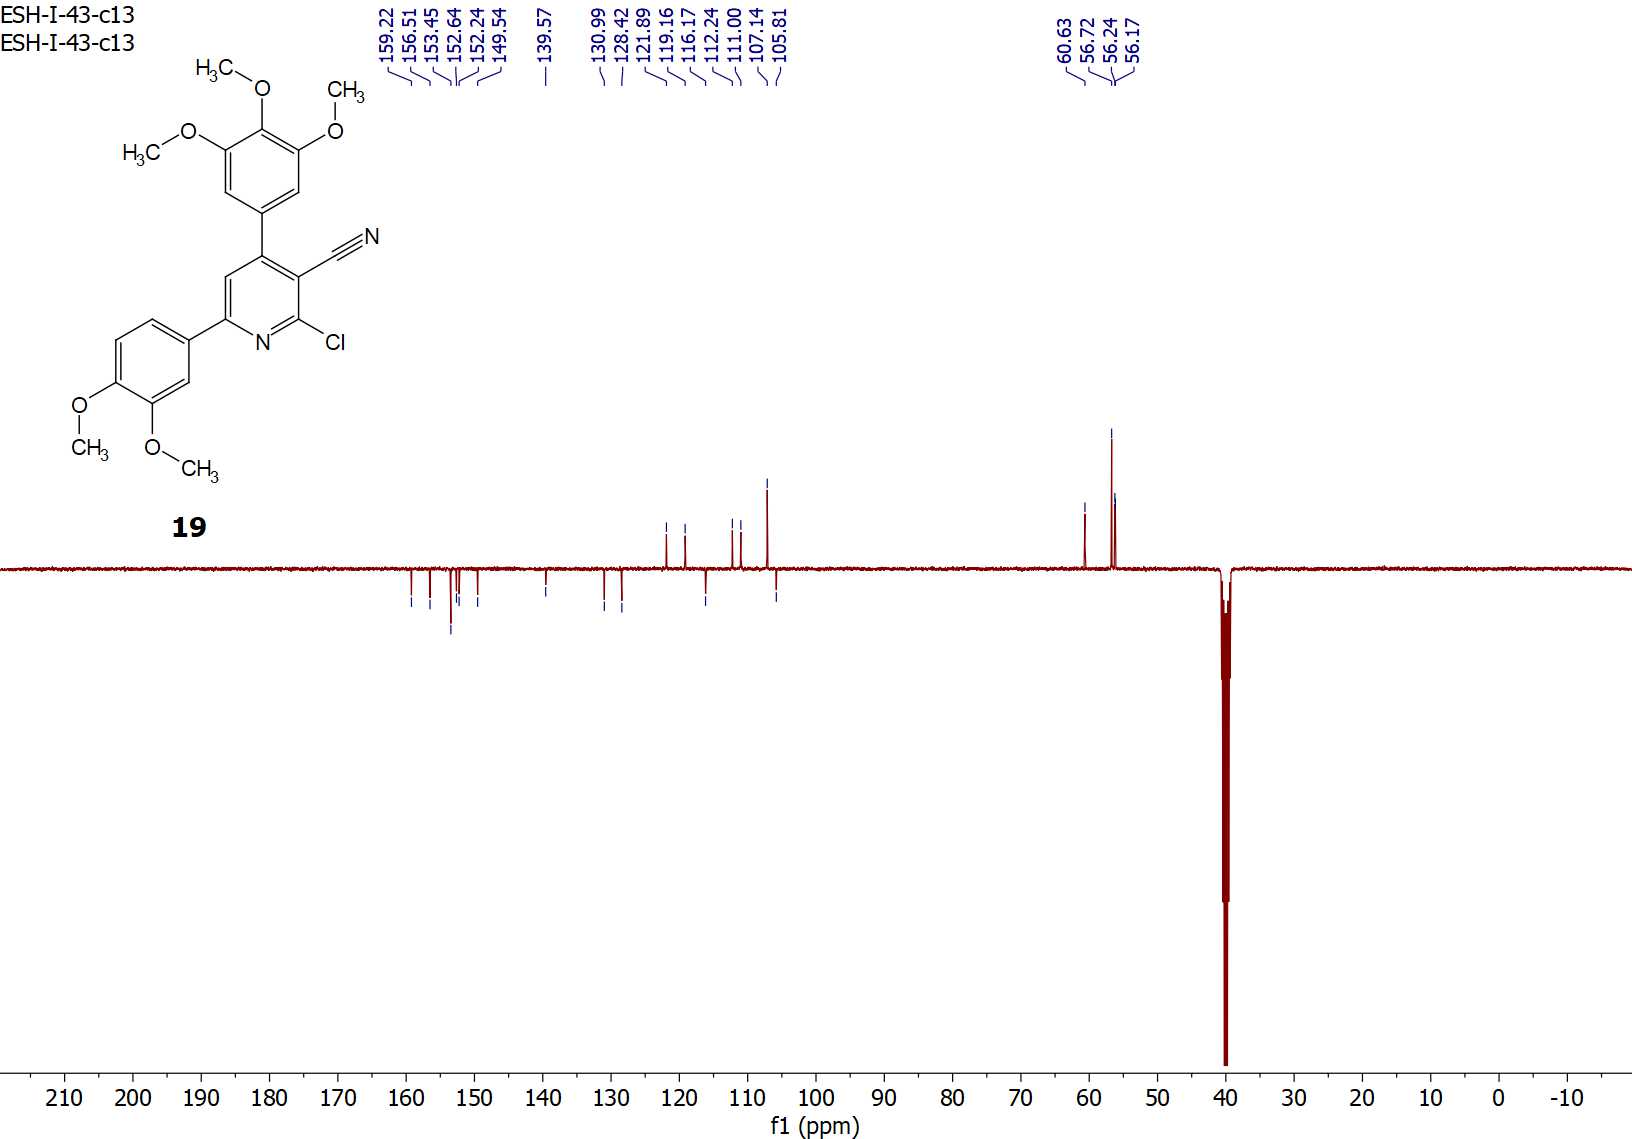


**Figure S20:** 13C-APT NMR spectrum of compound 19.


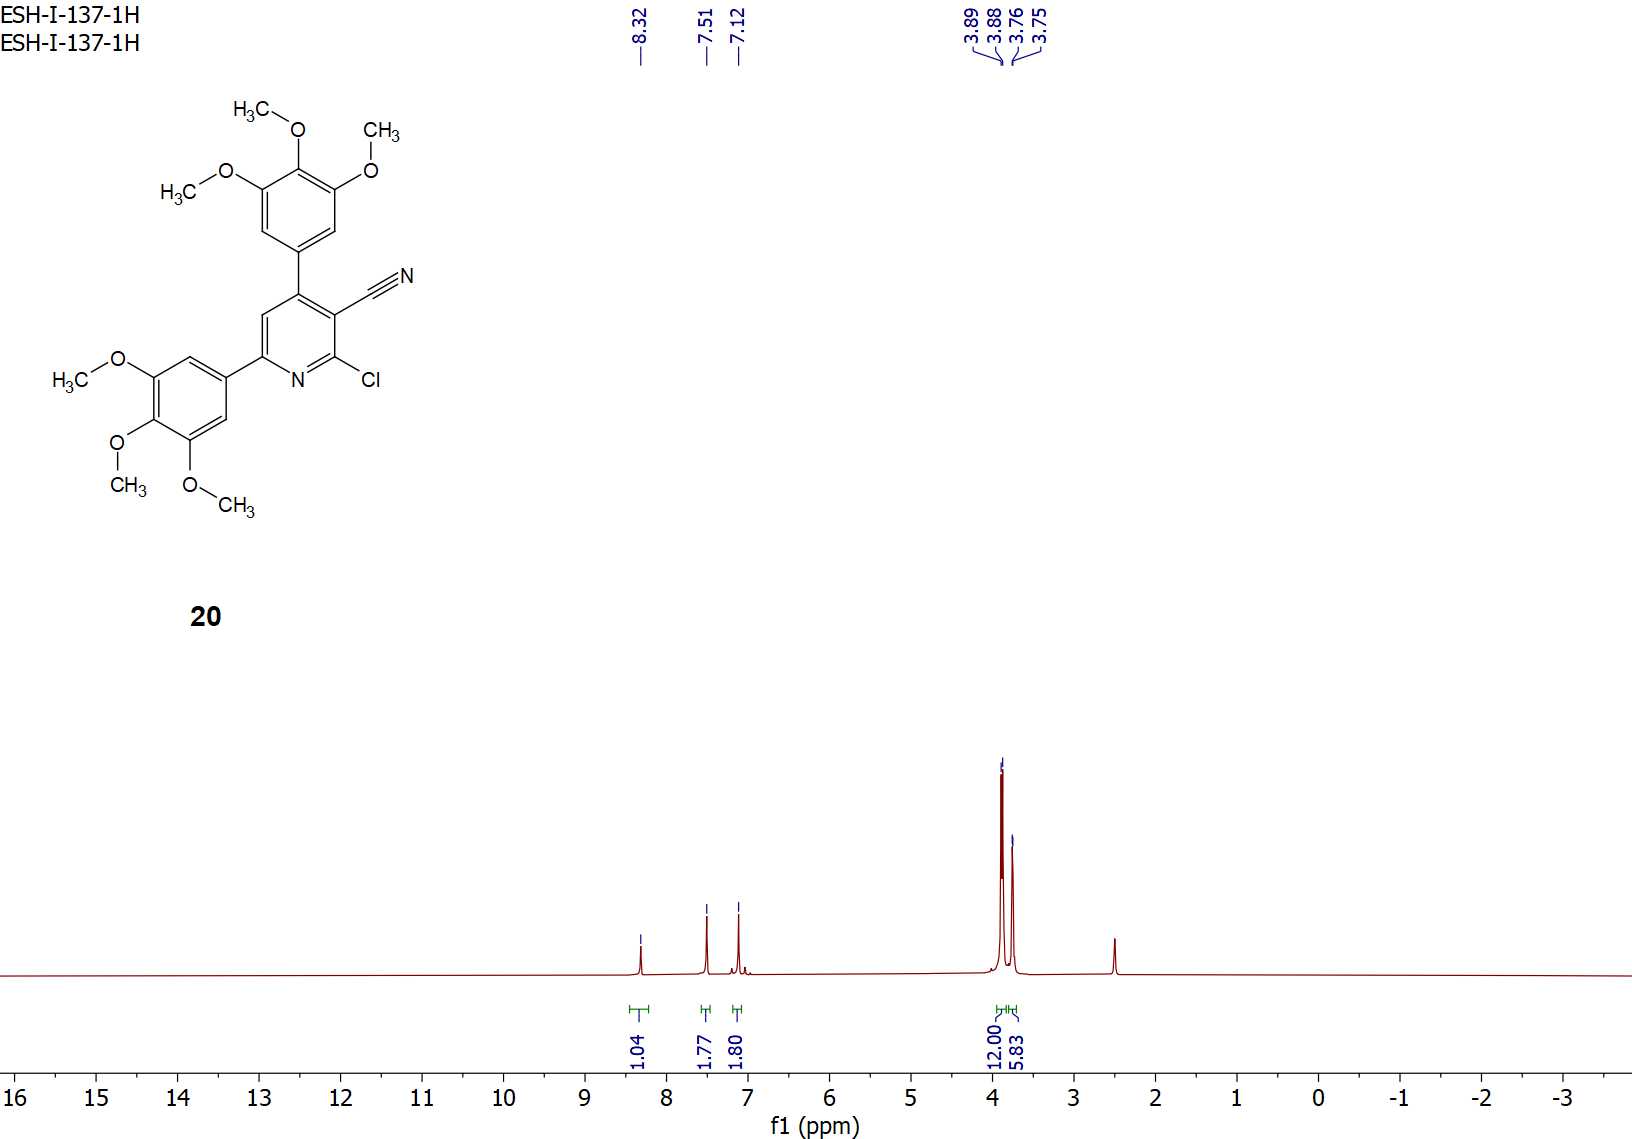


**Figure S21:** 1H-NMR spectrum of compound 20.


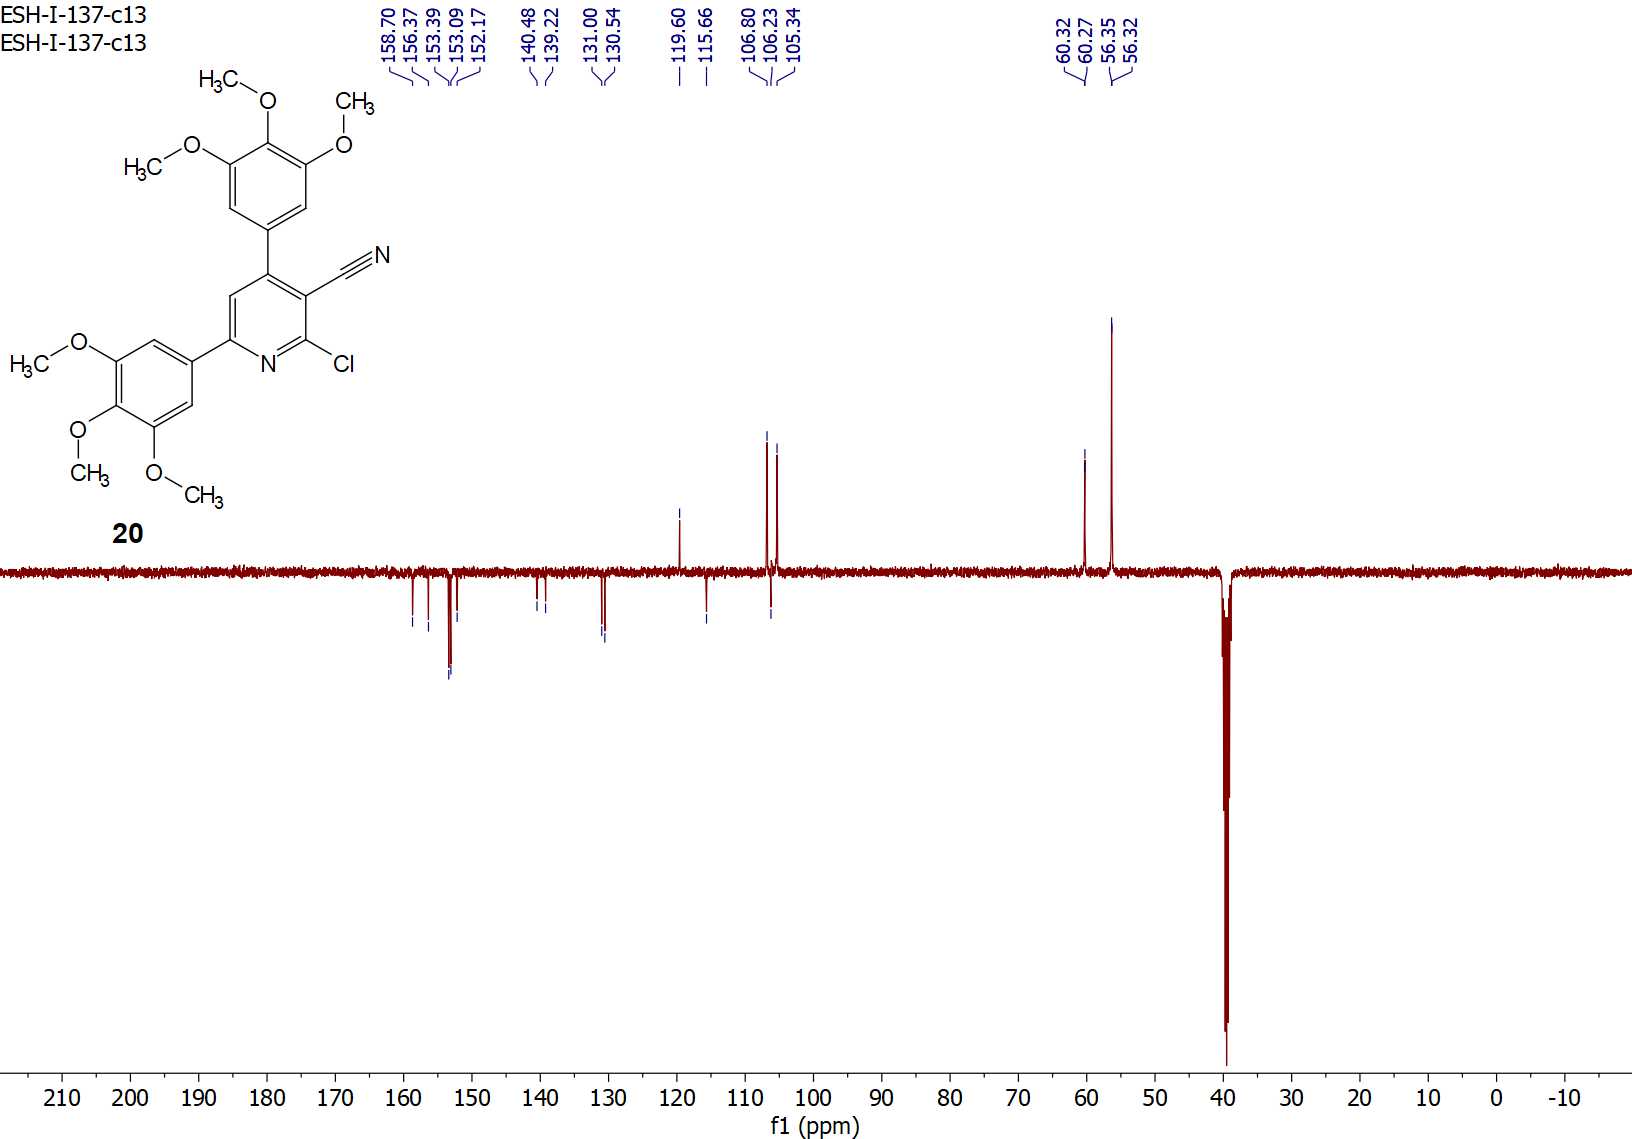


**Figure S22:** 13C-APT NMR spectrum of compound 20.


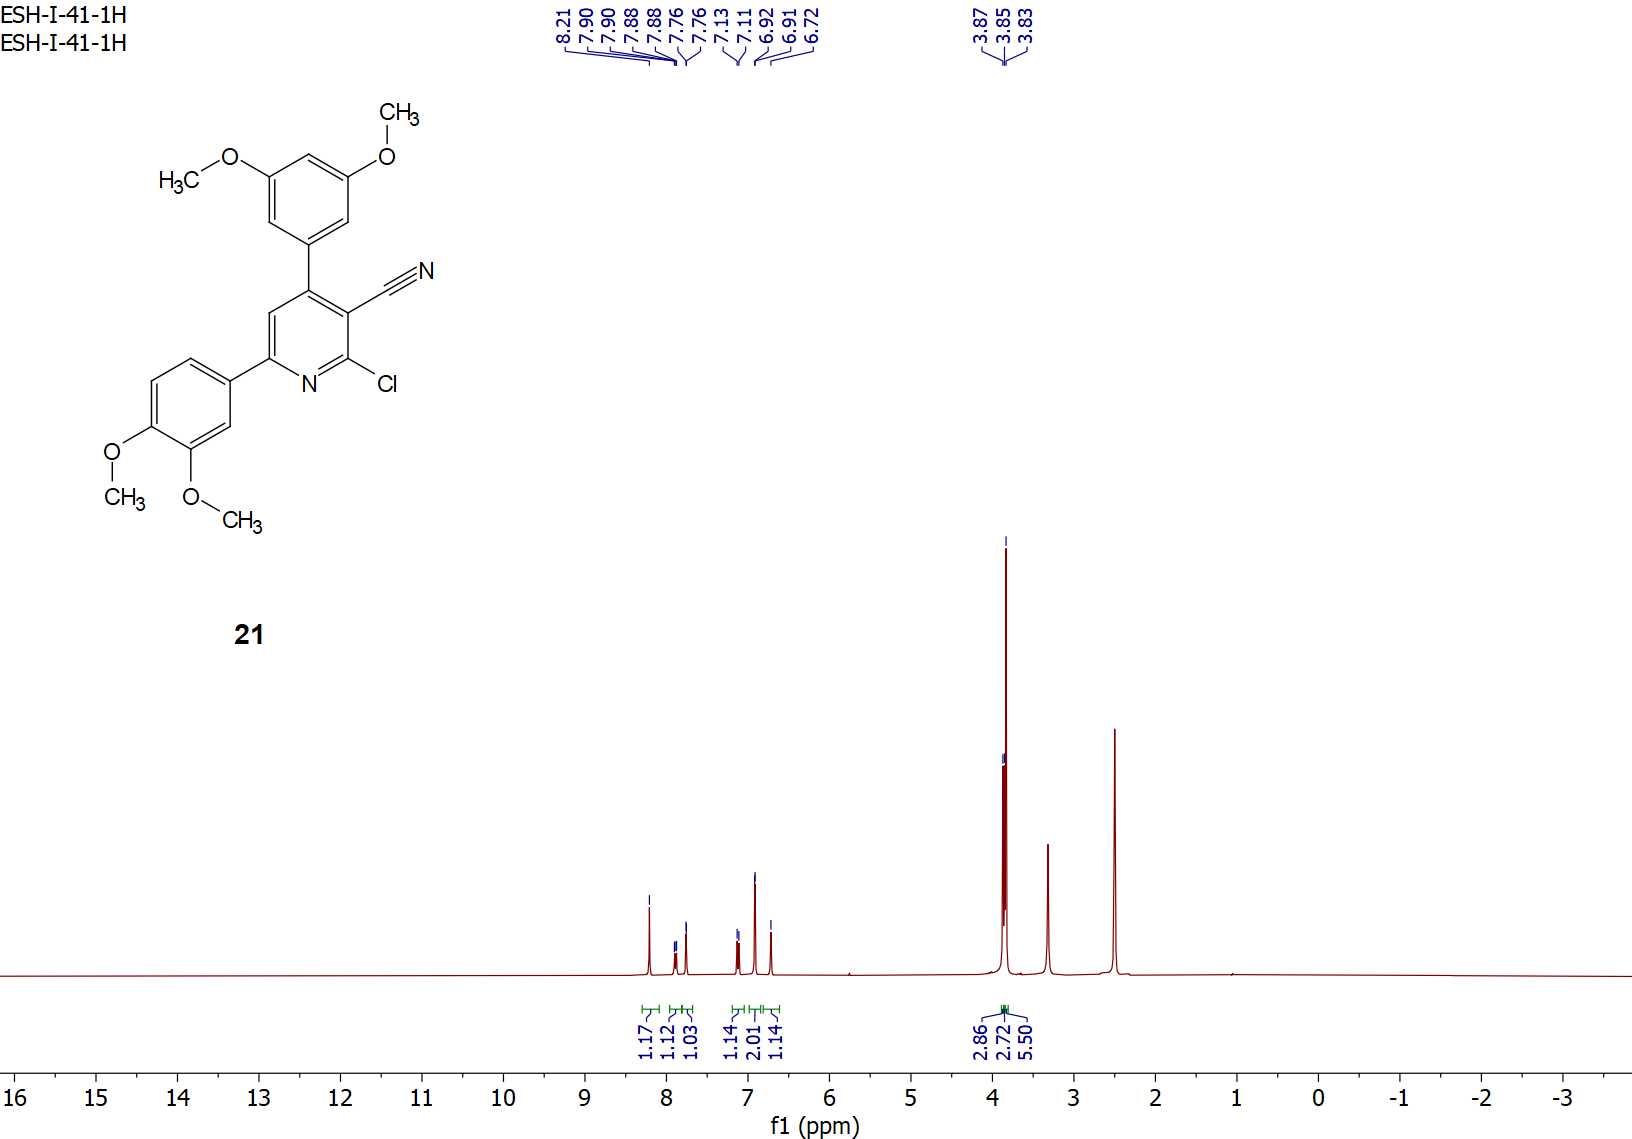


**Figure S23:** 1H-NMR spectrum of compound 21.


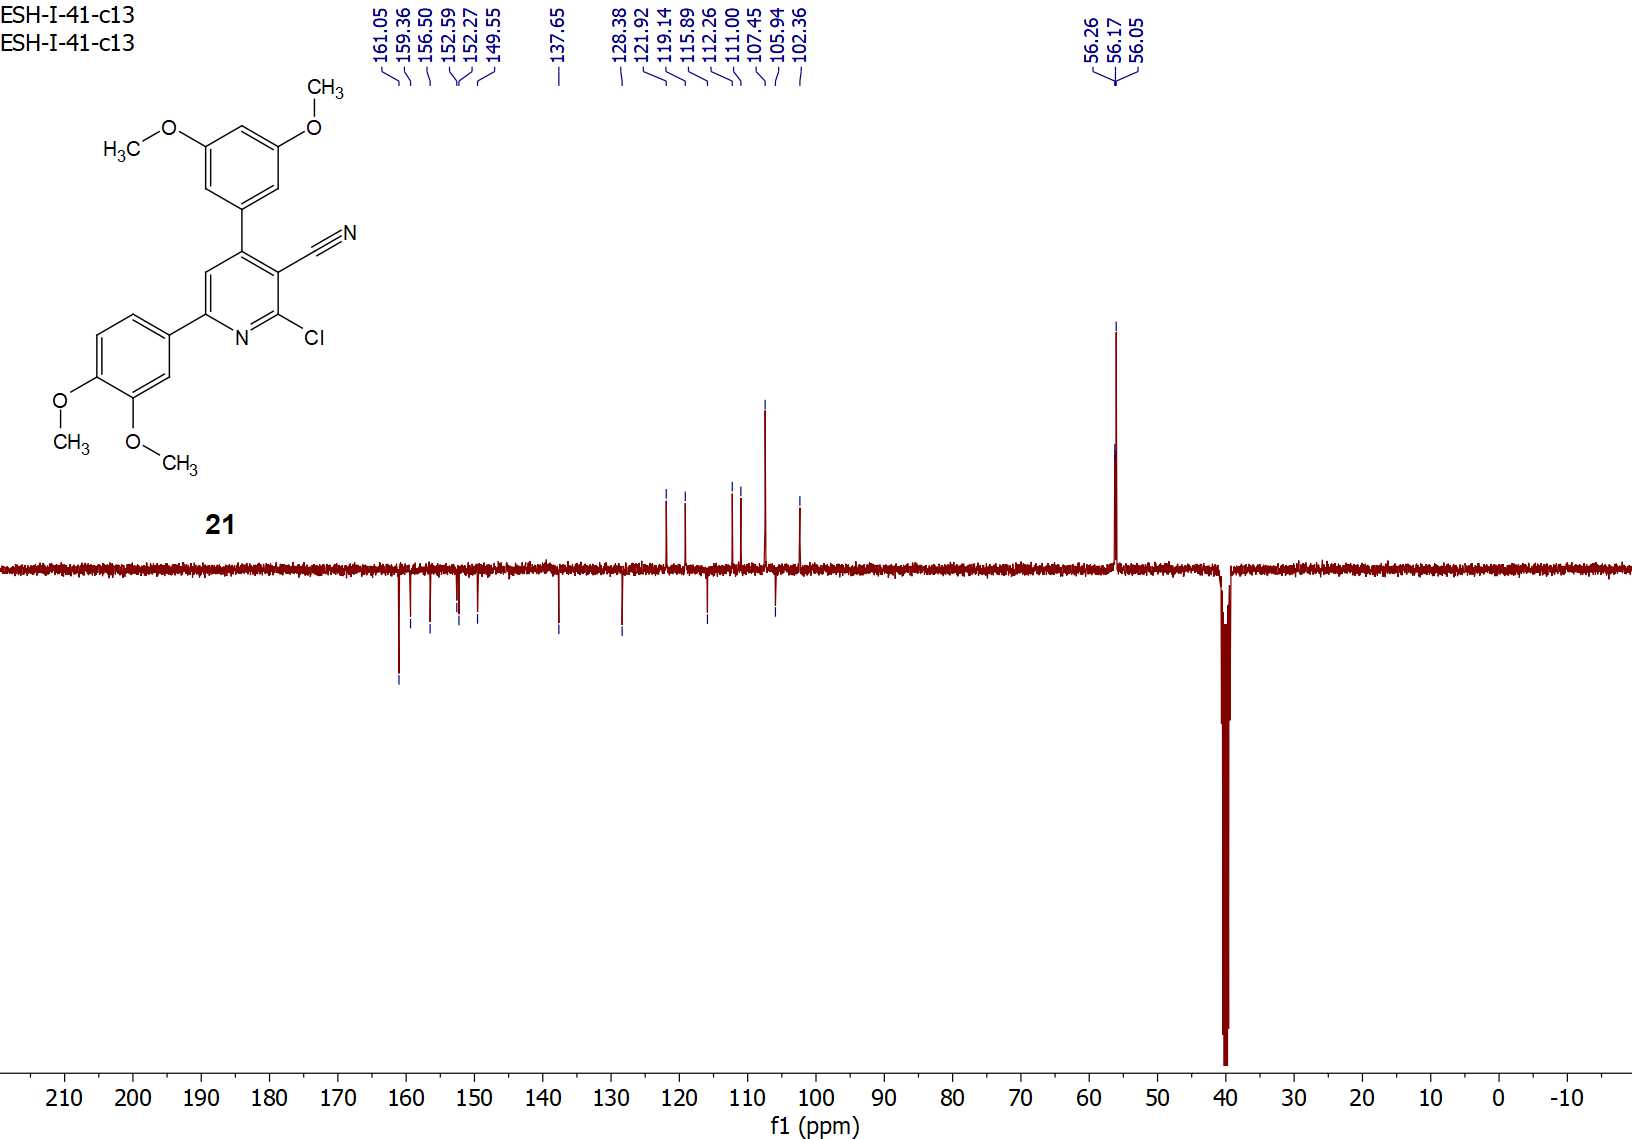


**Figure S24:** 13C-APT NMR spectrum of compound 21.


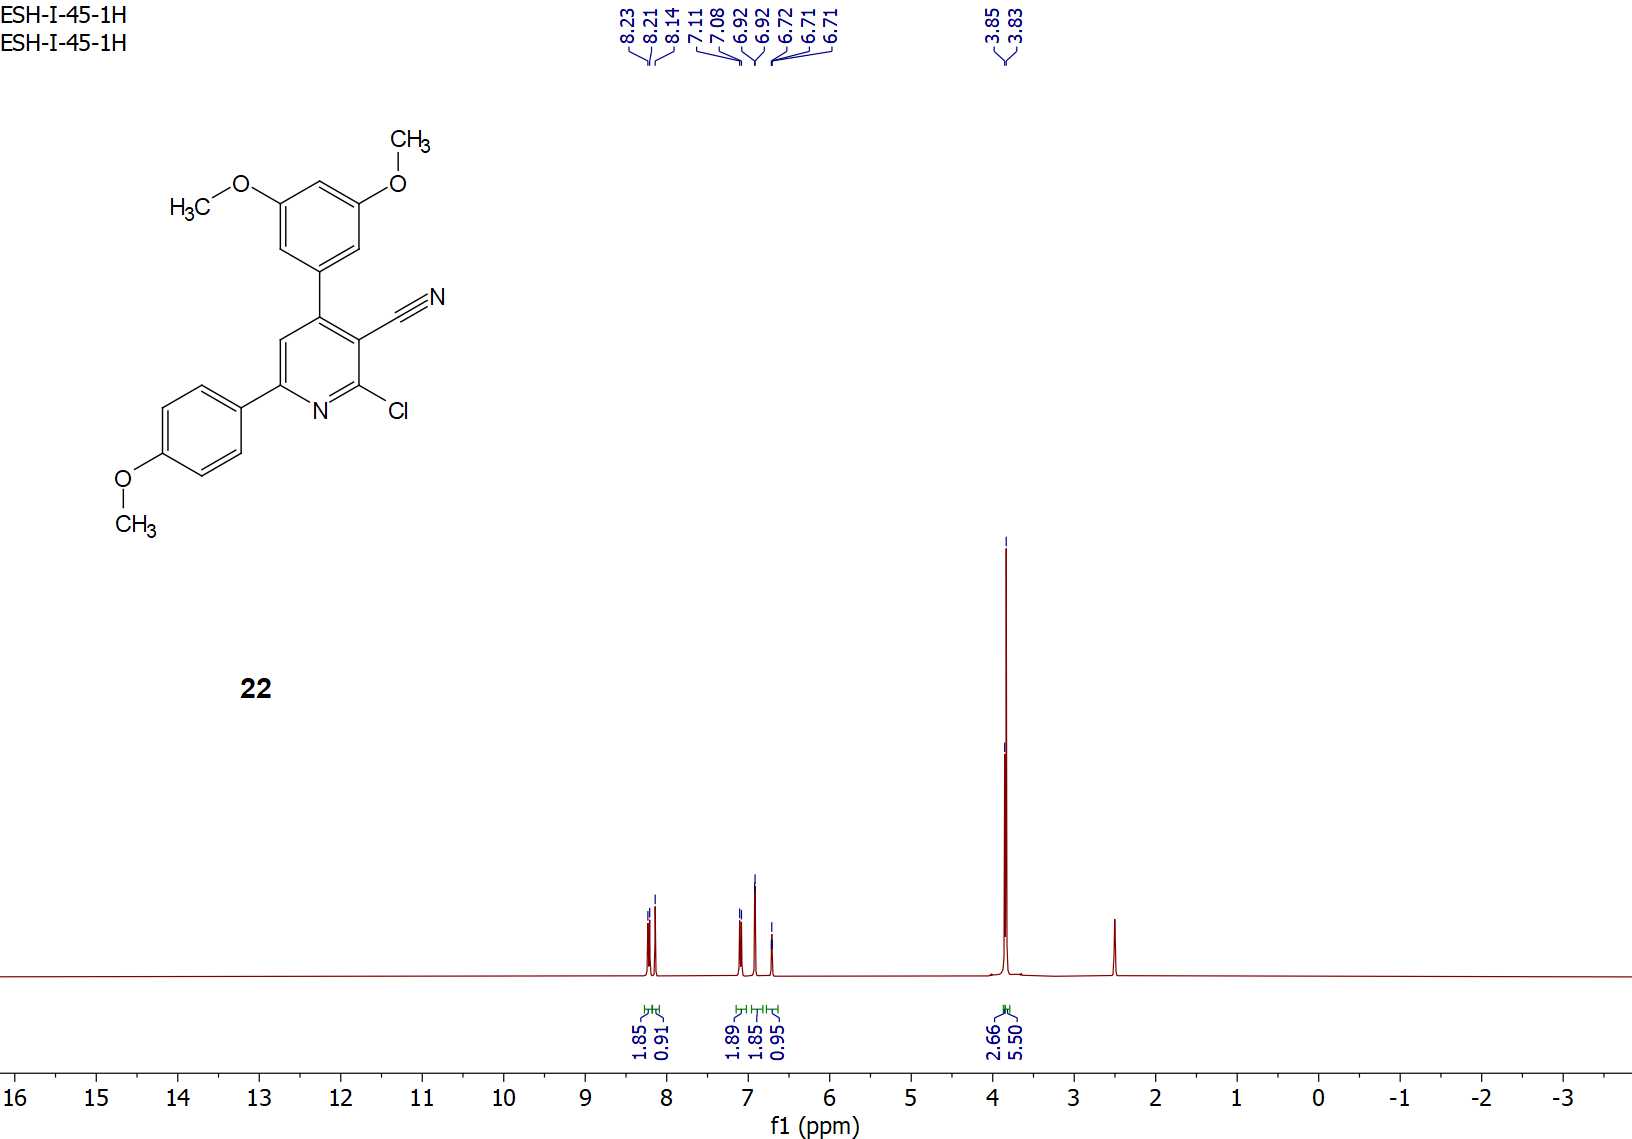


**Figure S25:** 1H-NMR spectrum of compound 22.


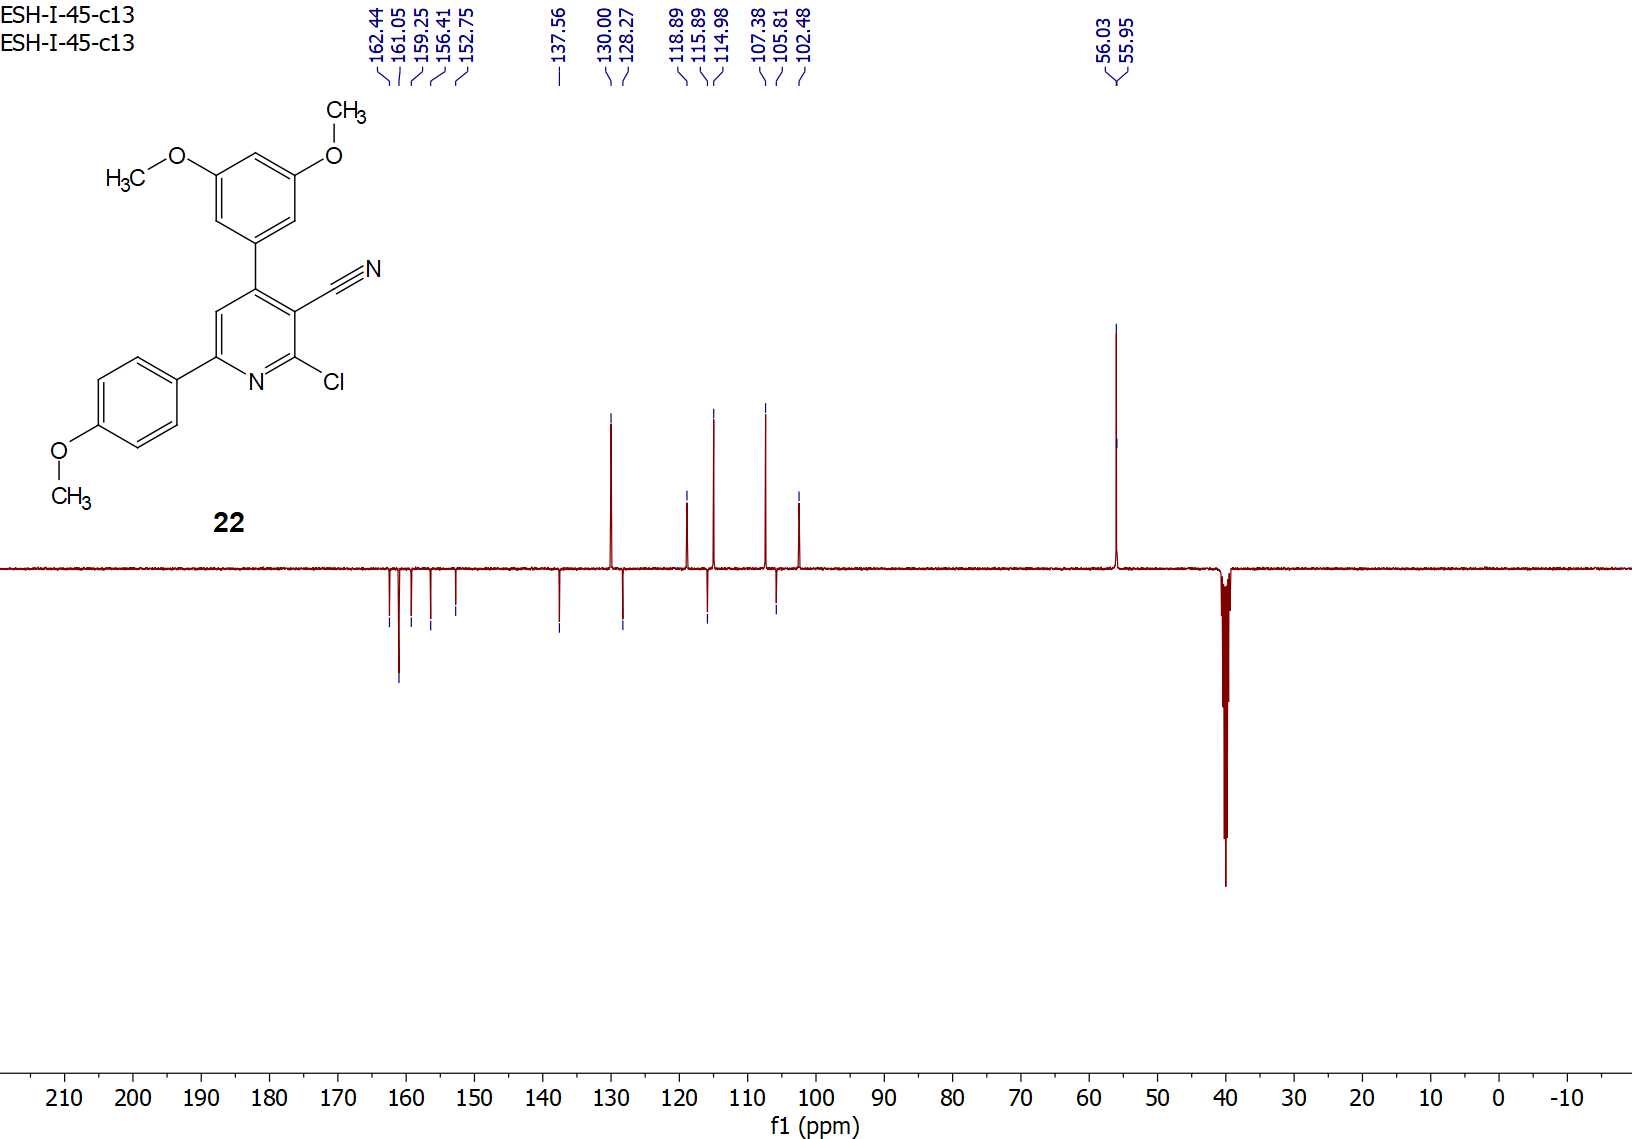


**Figure S26:** 13C-APT NMR spectrum of compound 22.


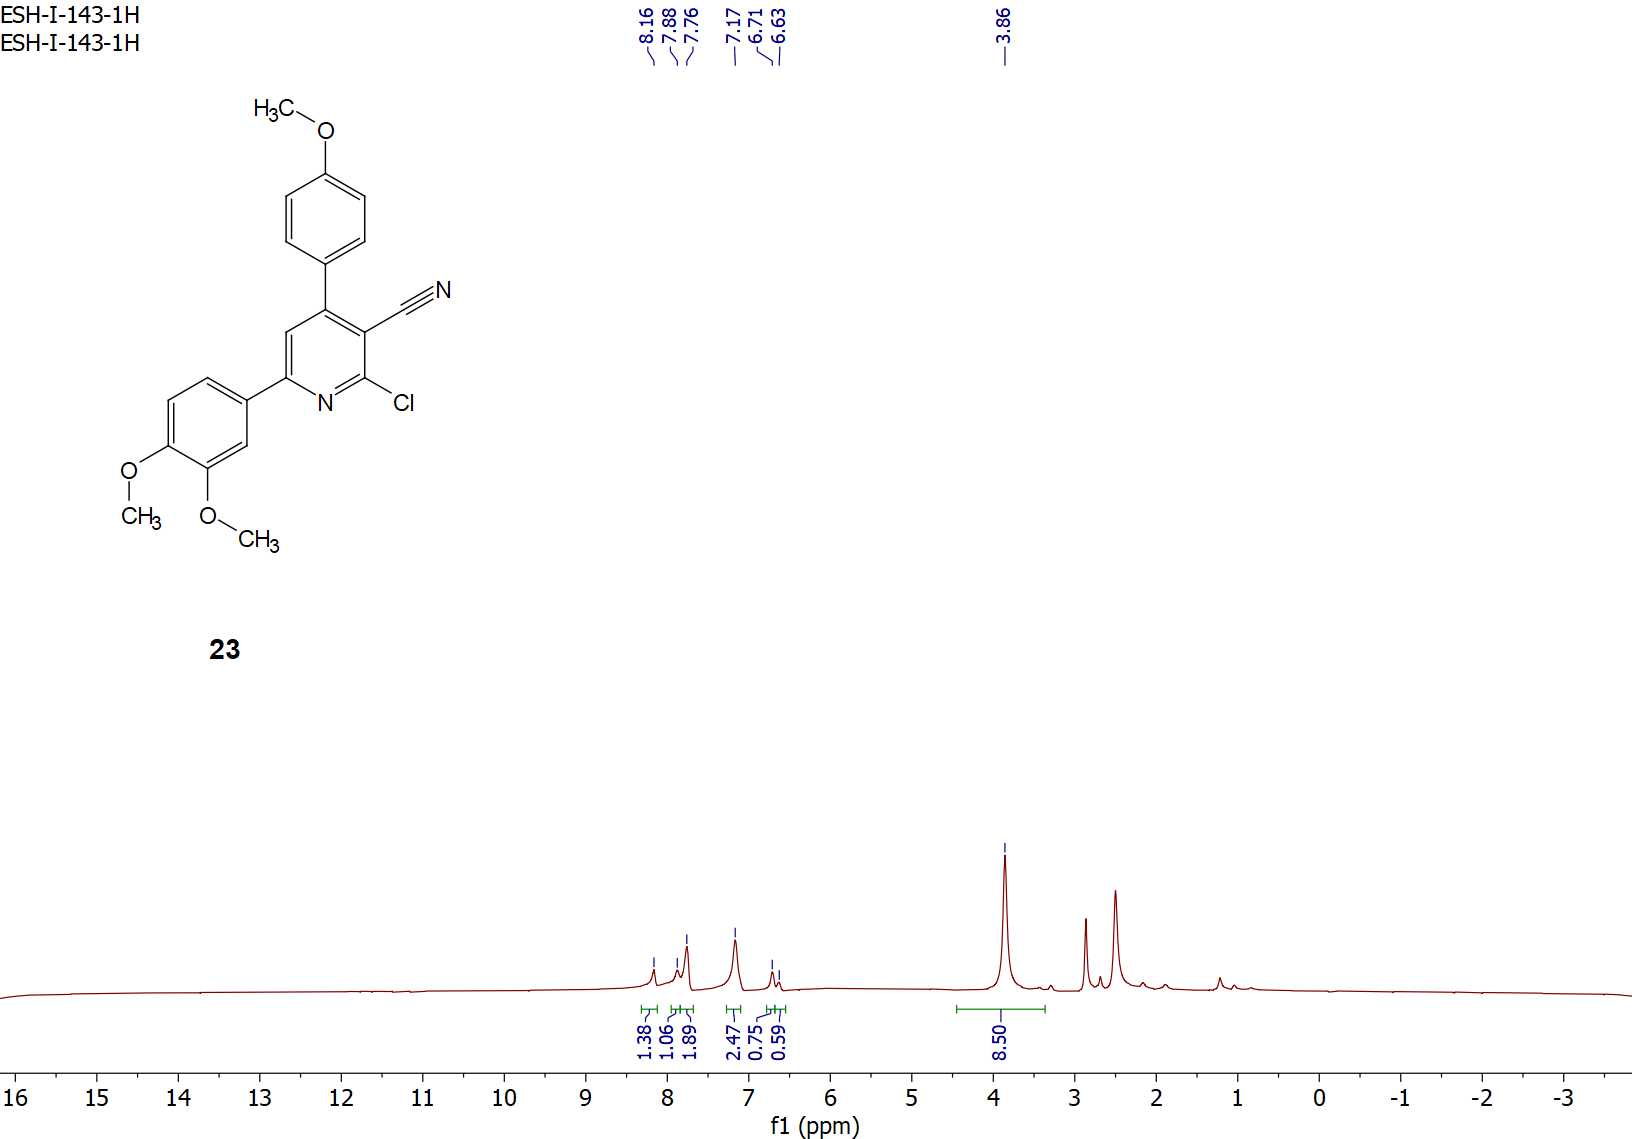


**Figure S27:** 1H-NMR spectrum of compound 23.


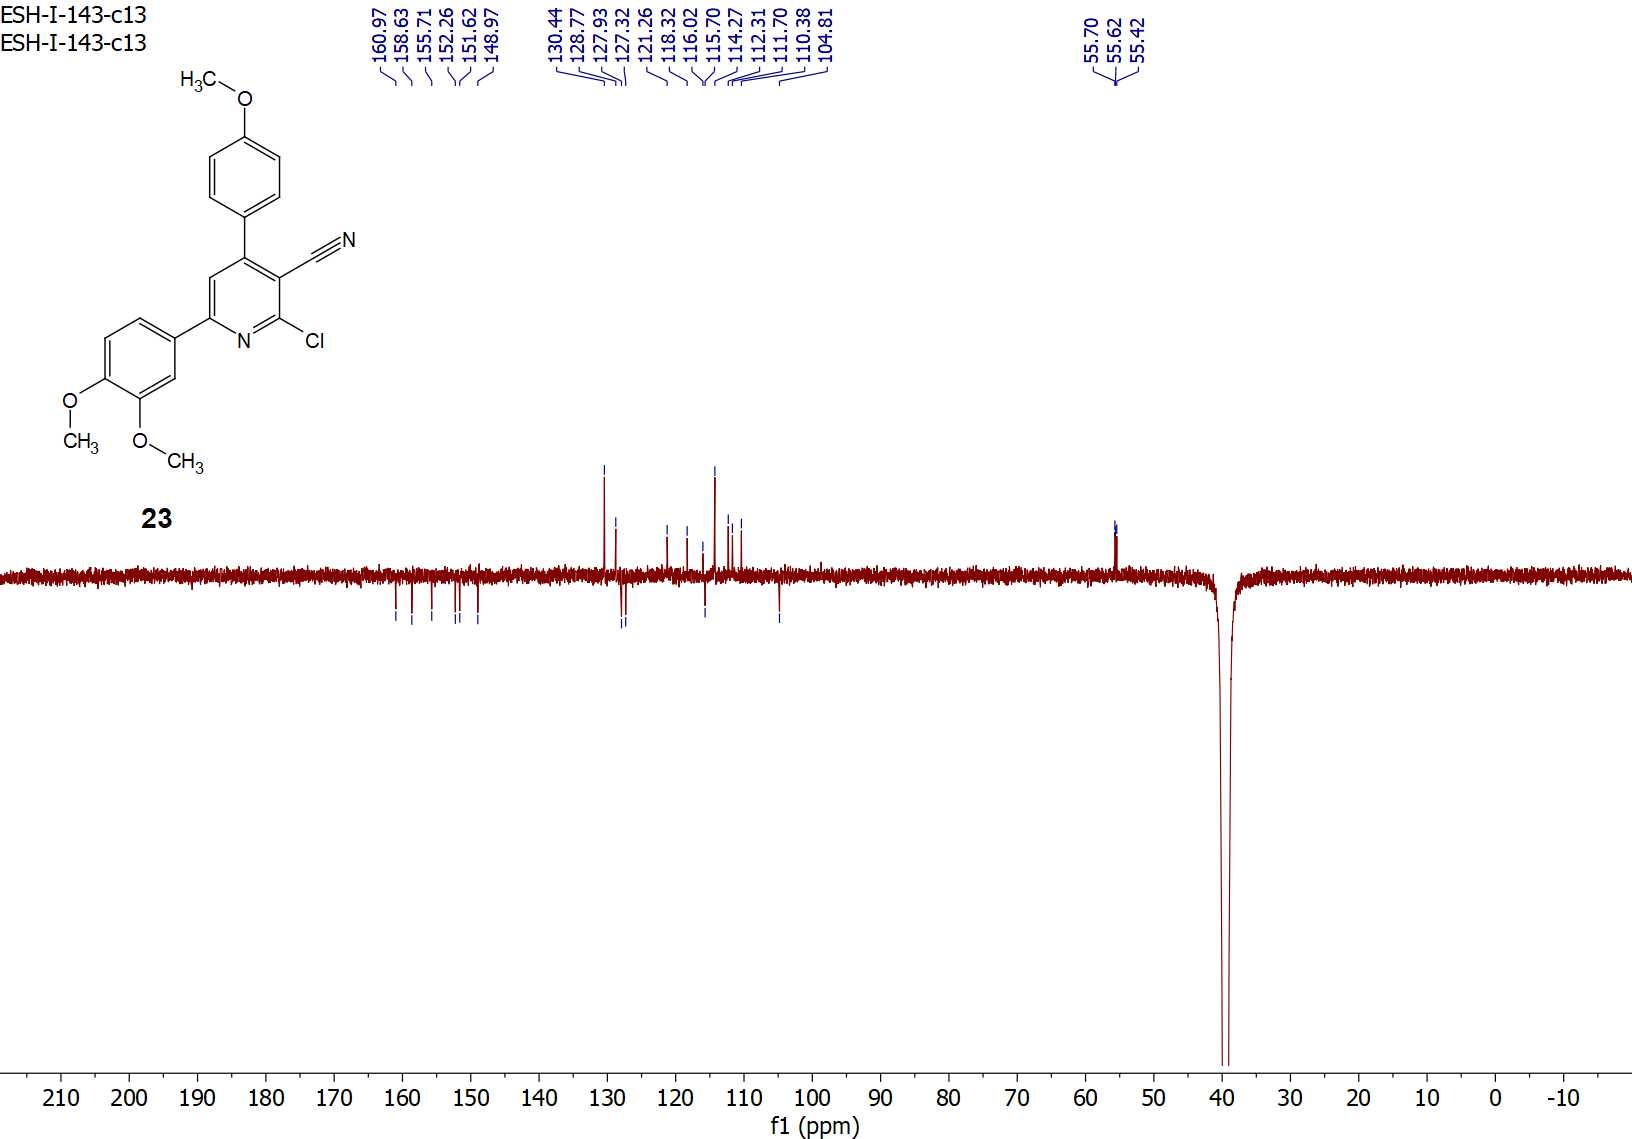


**Figure S28:** 13C-APT NMR spectrum of compound 23.


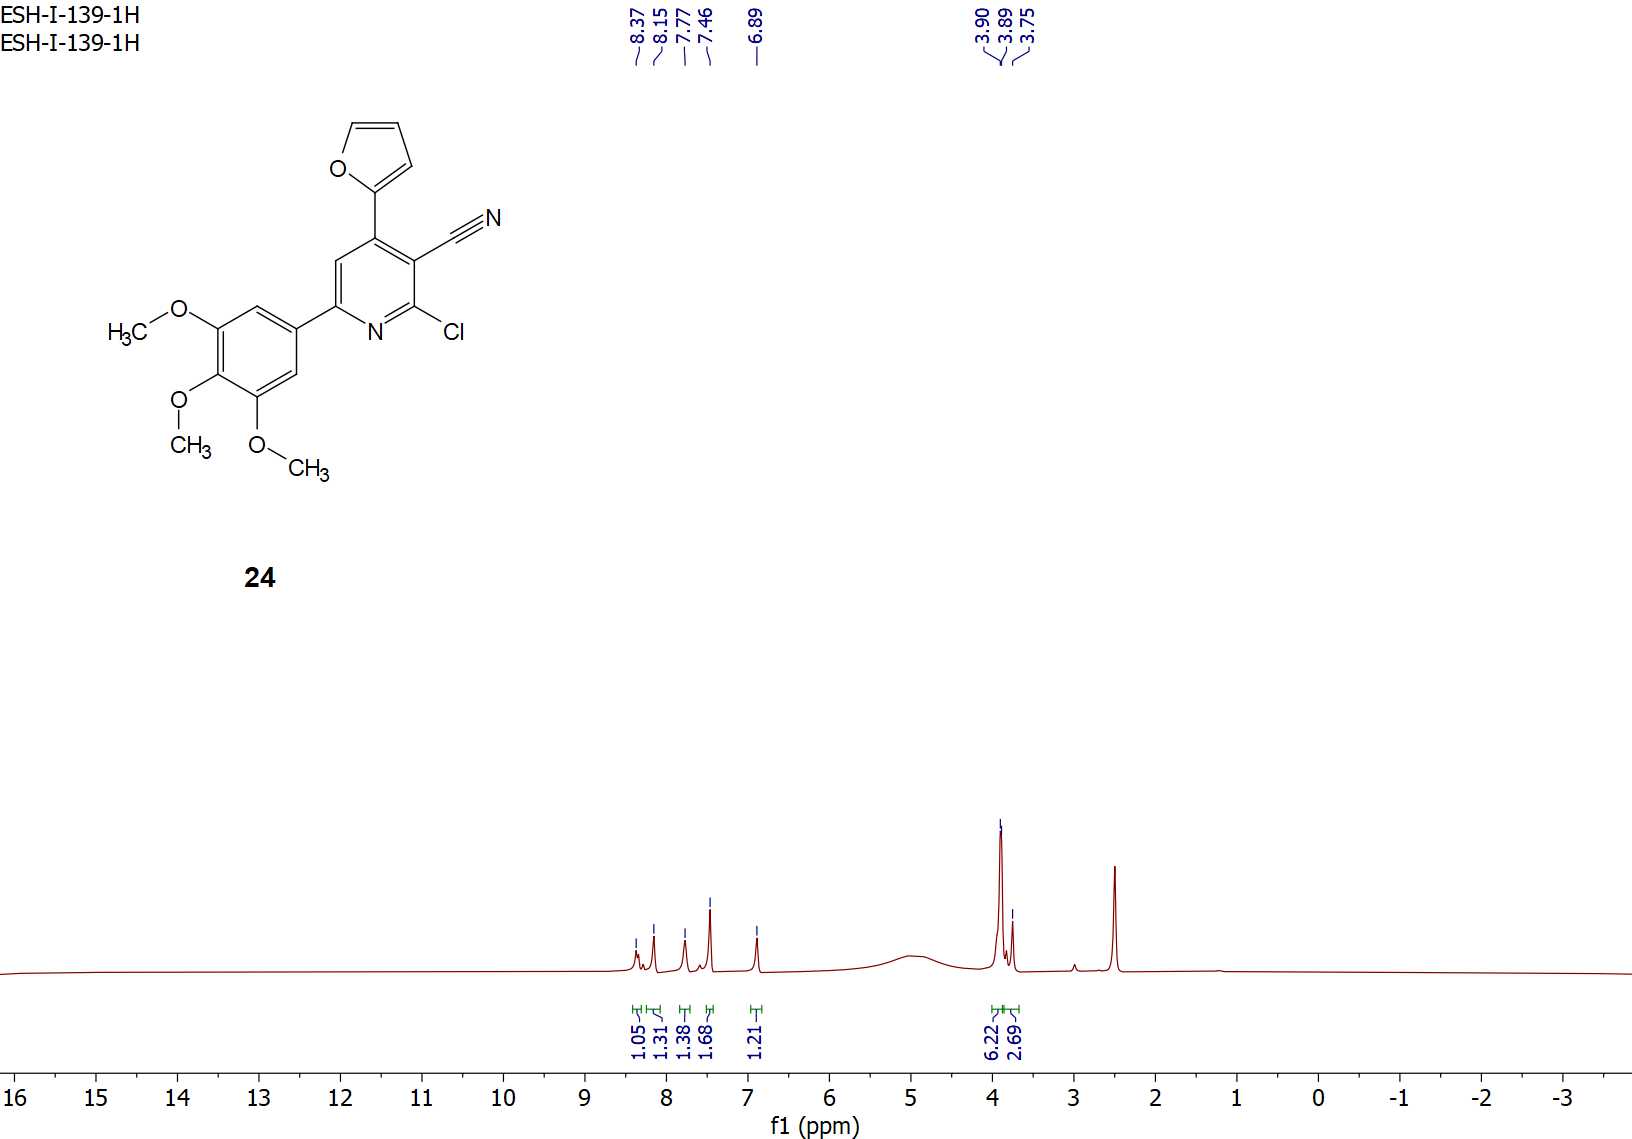


**Figure S29:** 1H-NMR spectrum of compound 24.


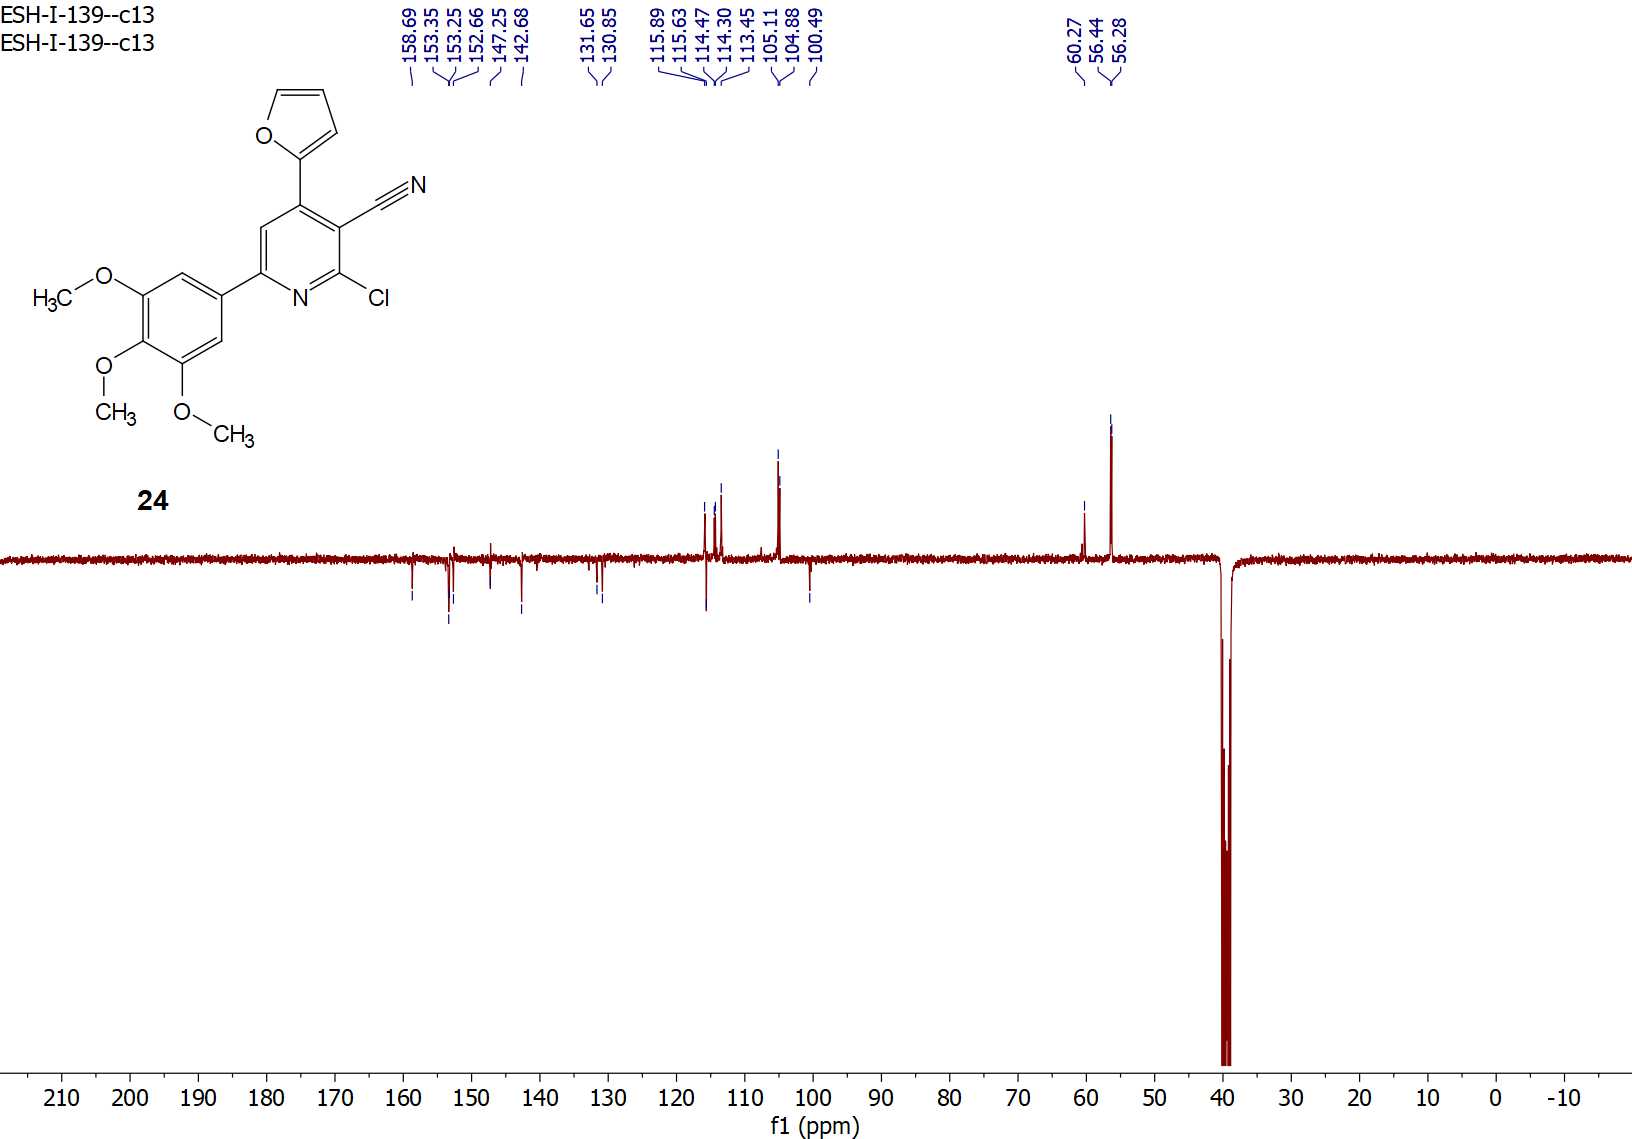


**Figure S30:** 13C-APT NMR spectrum of compound 24.


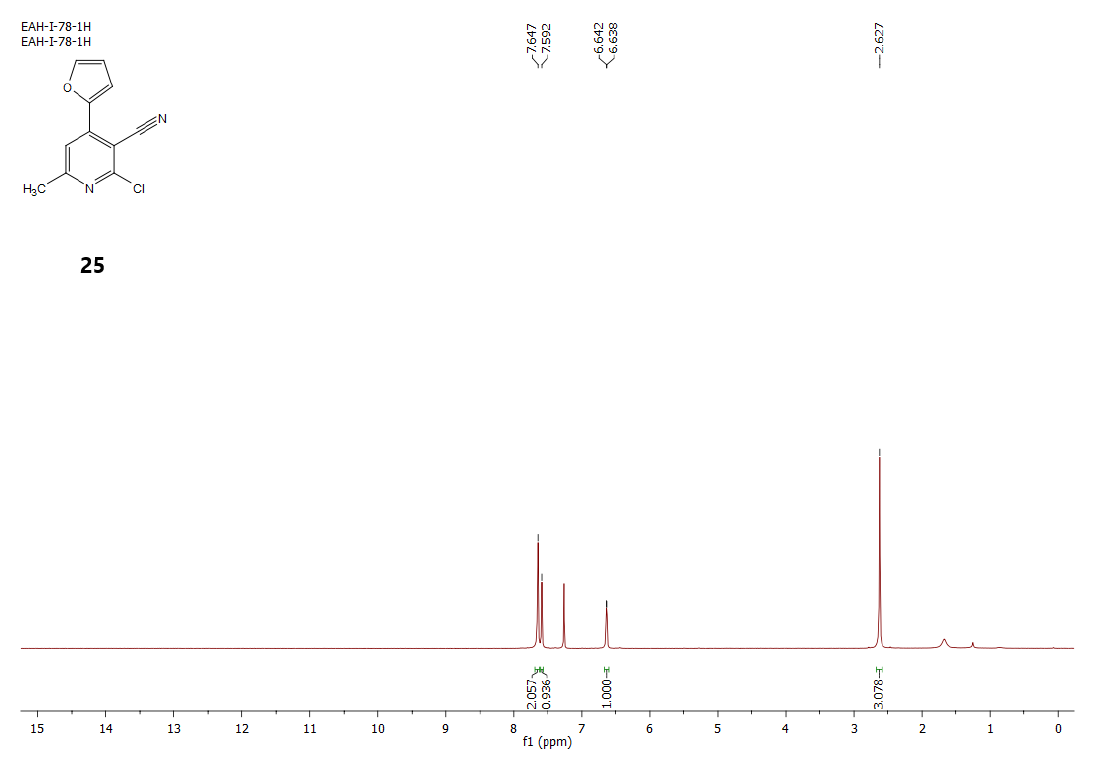


**Figure S31:** 1H-NMR spectrum of compound 25.


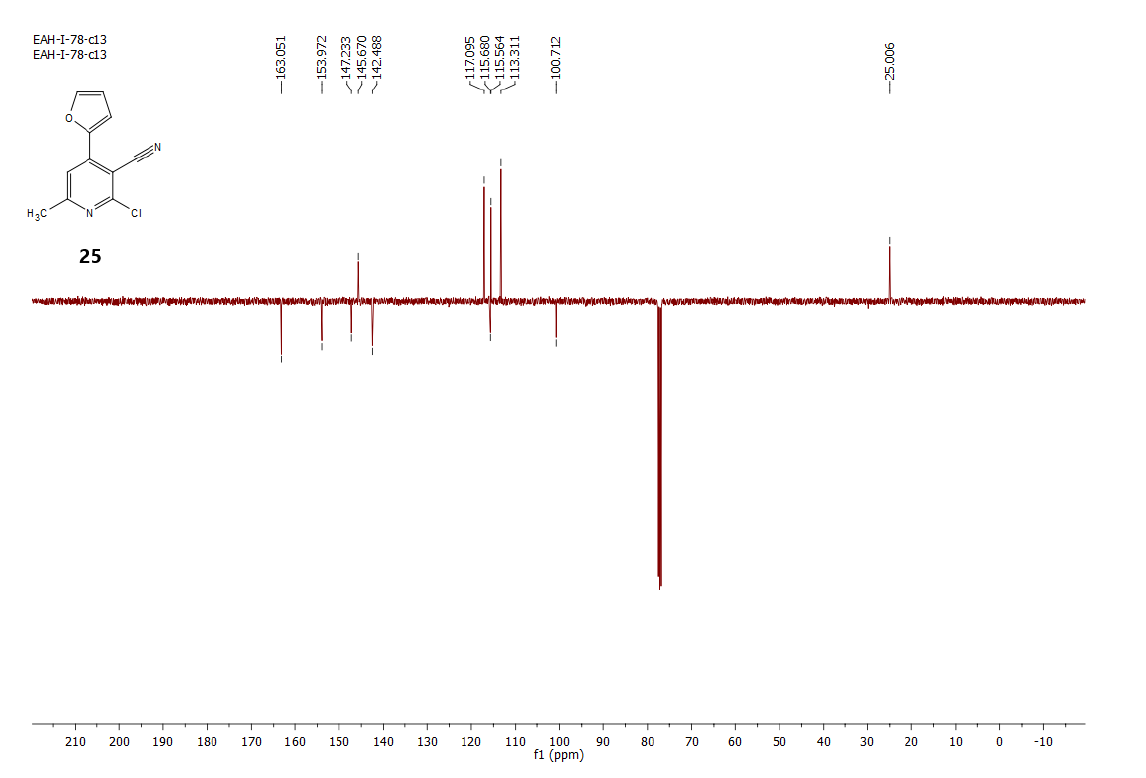


**Figure S32:** 13C-APT NMR spectrum of compound 25.


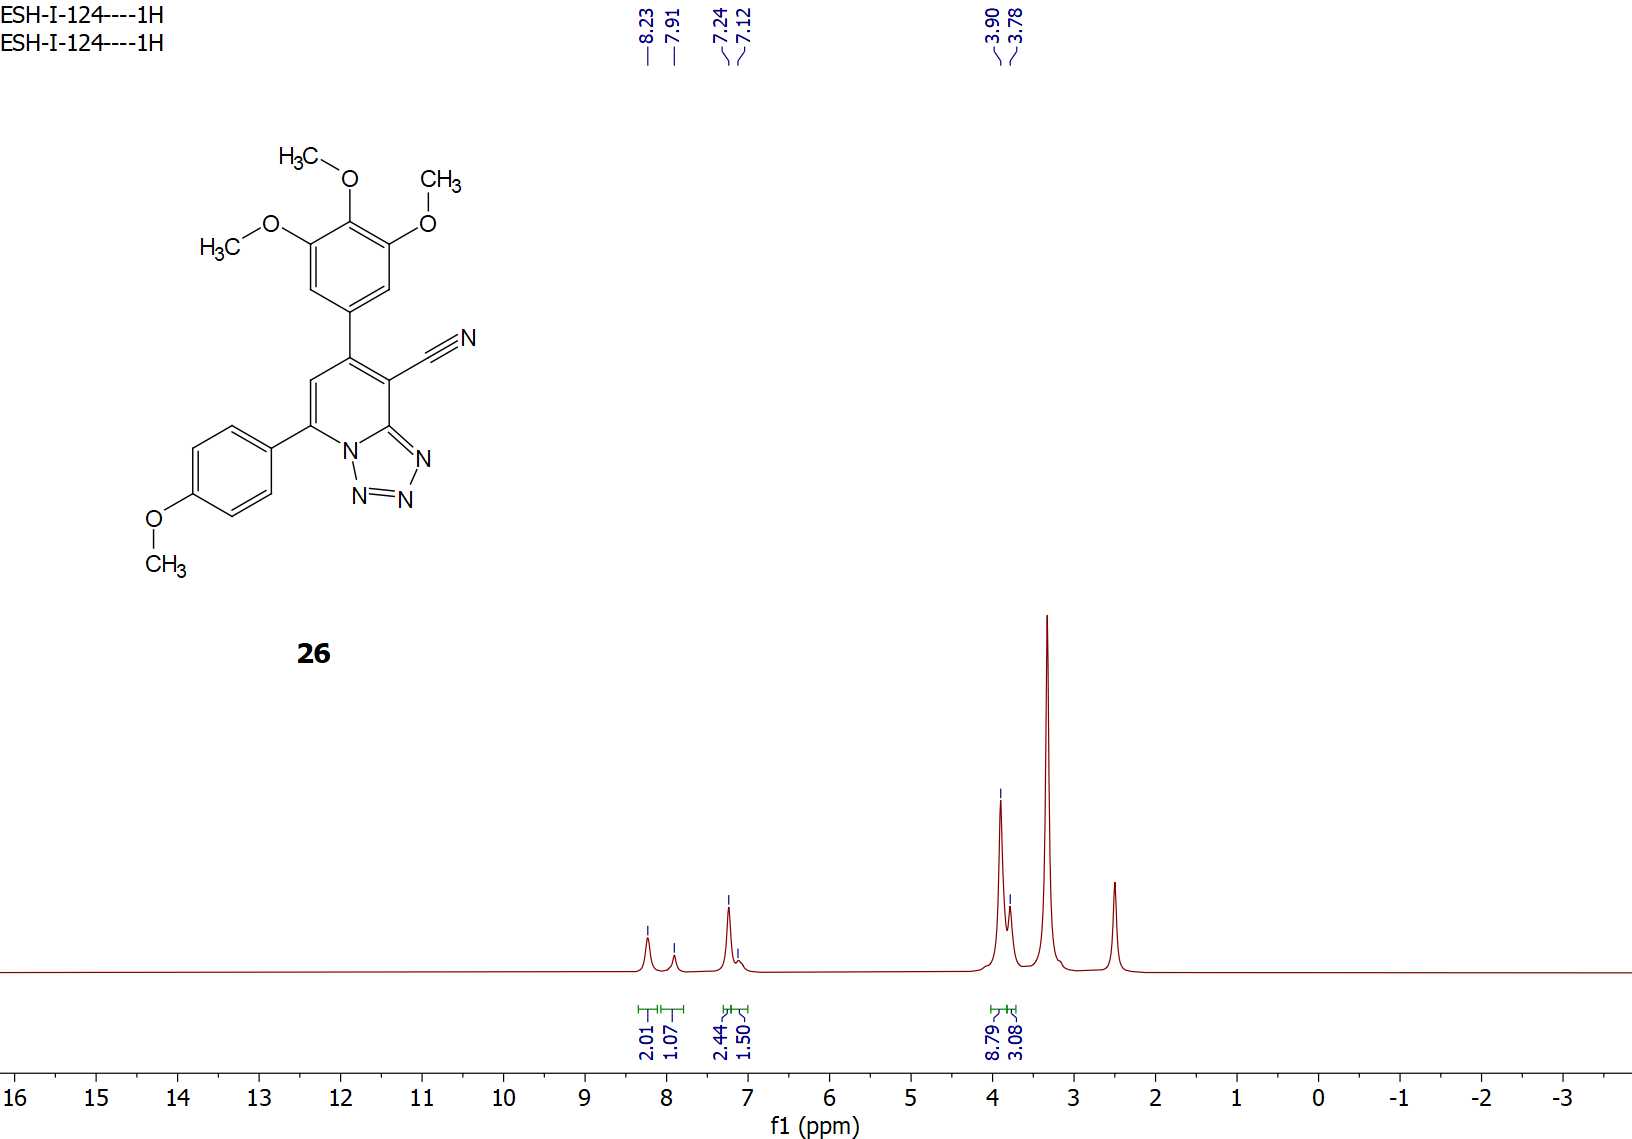


**Figure S33:** 1H-NMR spectrum of compound 26.


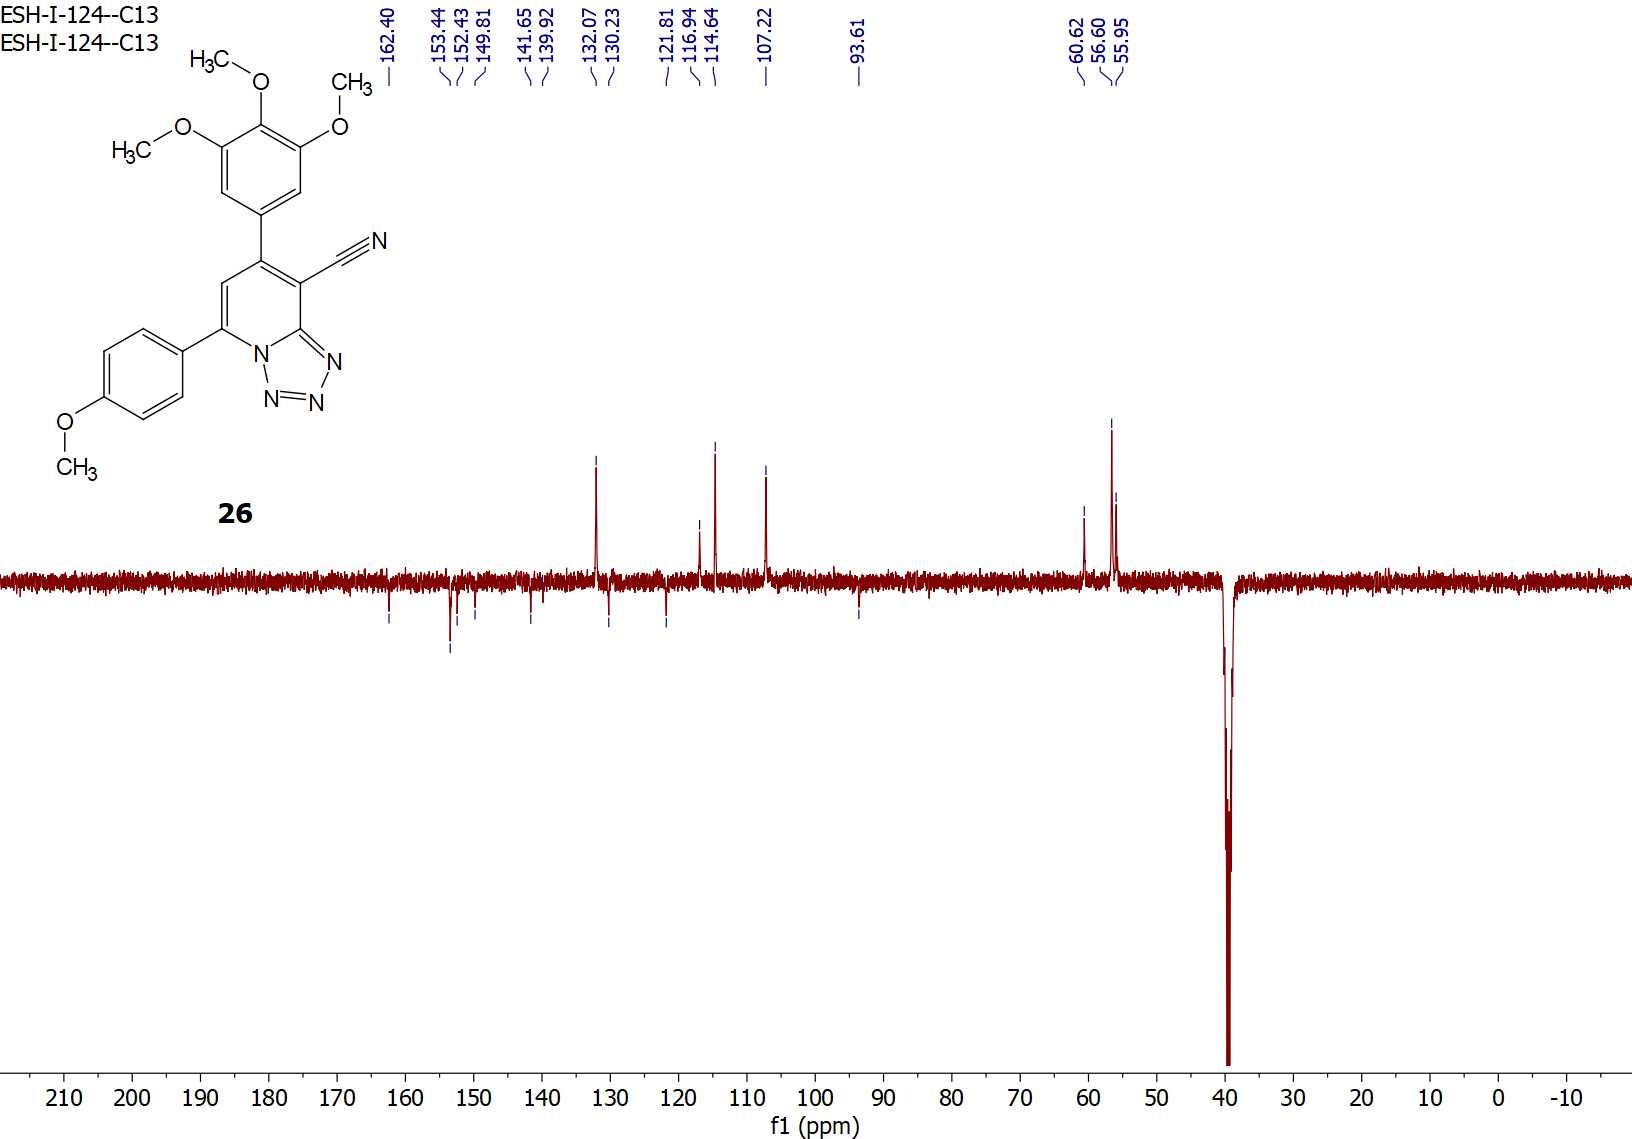


**Figure S34:** 13C-APT NMR spectrum of compound 26.


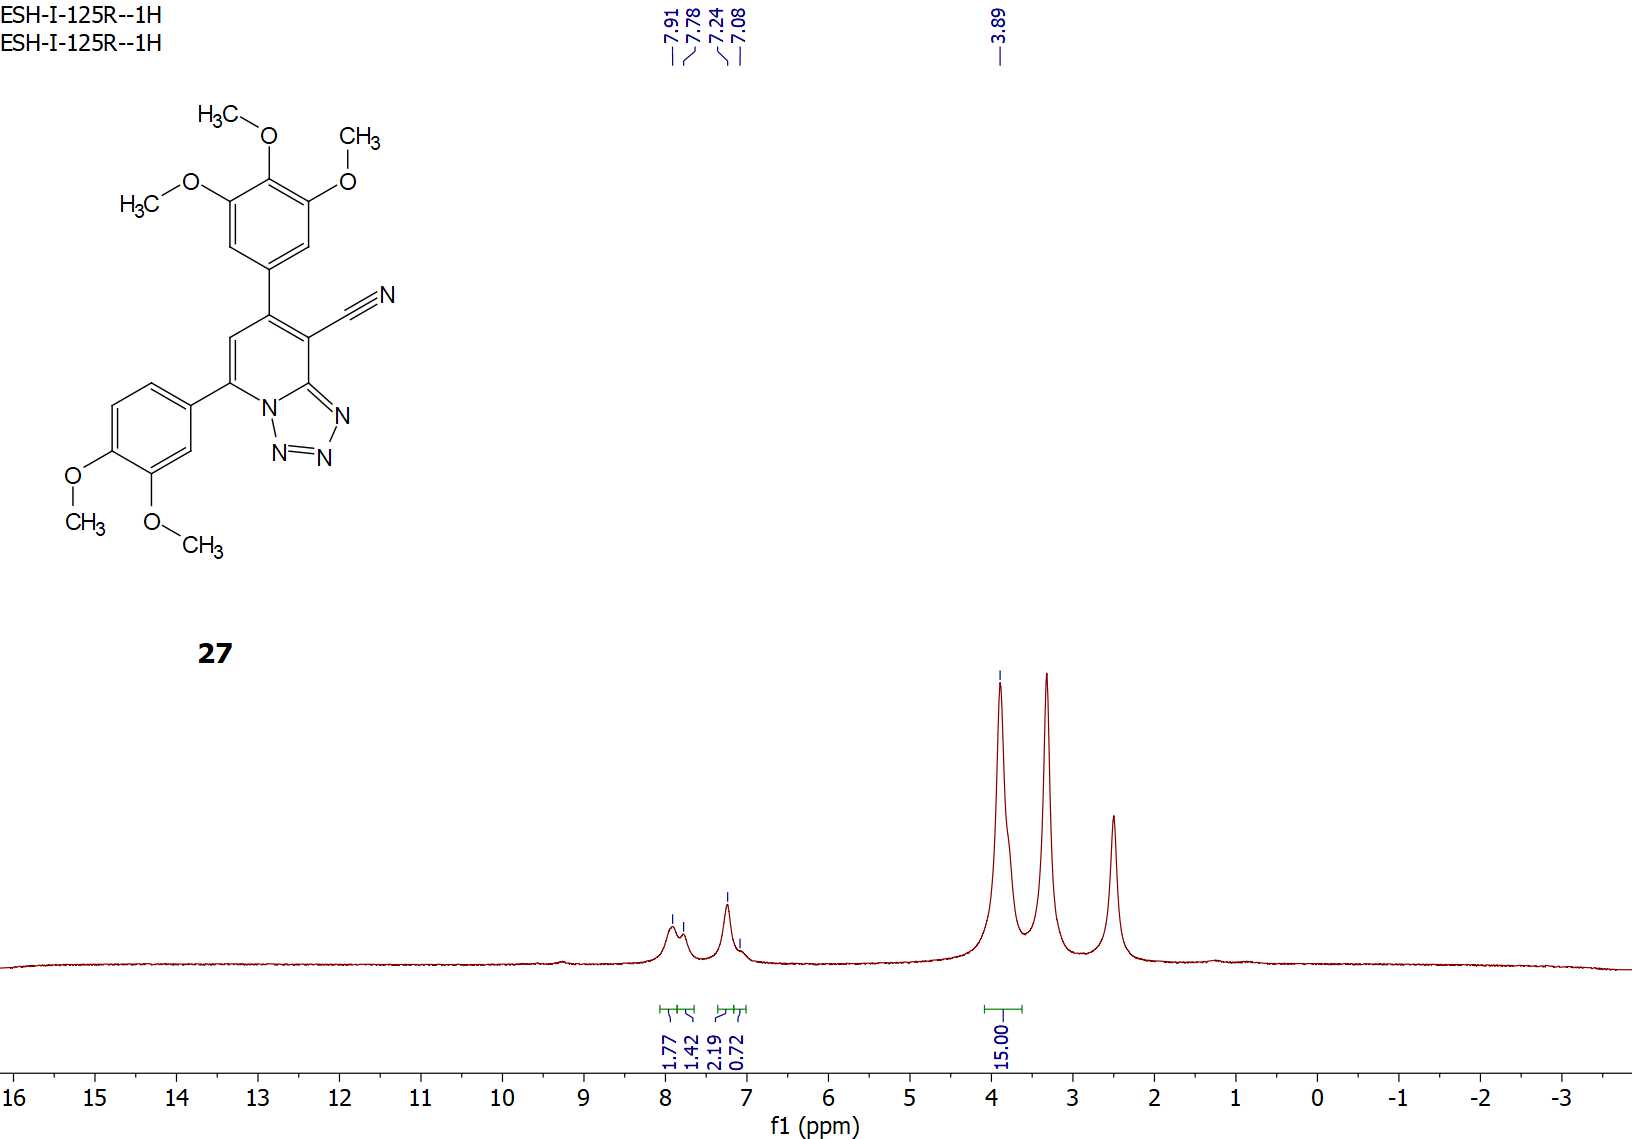


**Figure S35:** 1H-NMR spectrum of compound 27.


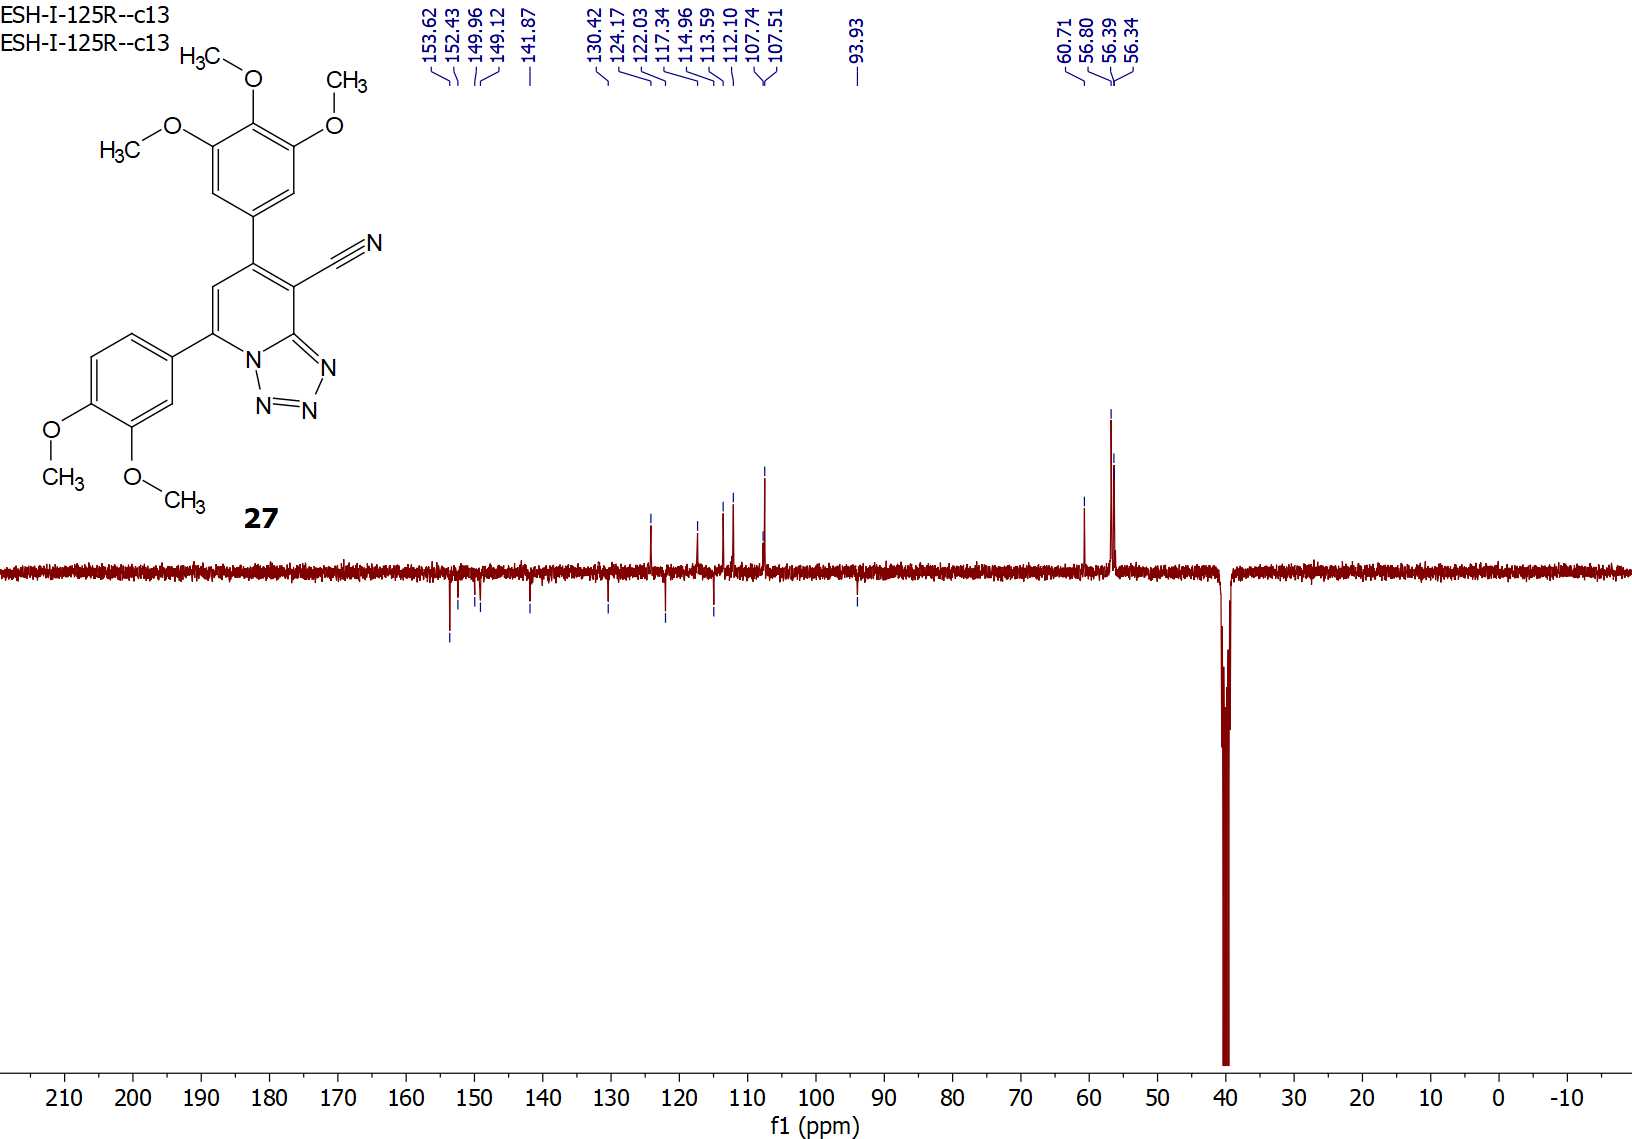


**Figure S36:** 13C-APT NMR spectrum of compound 27.


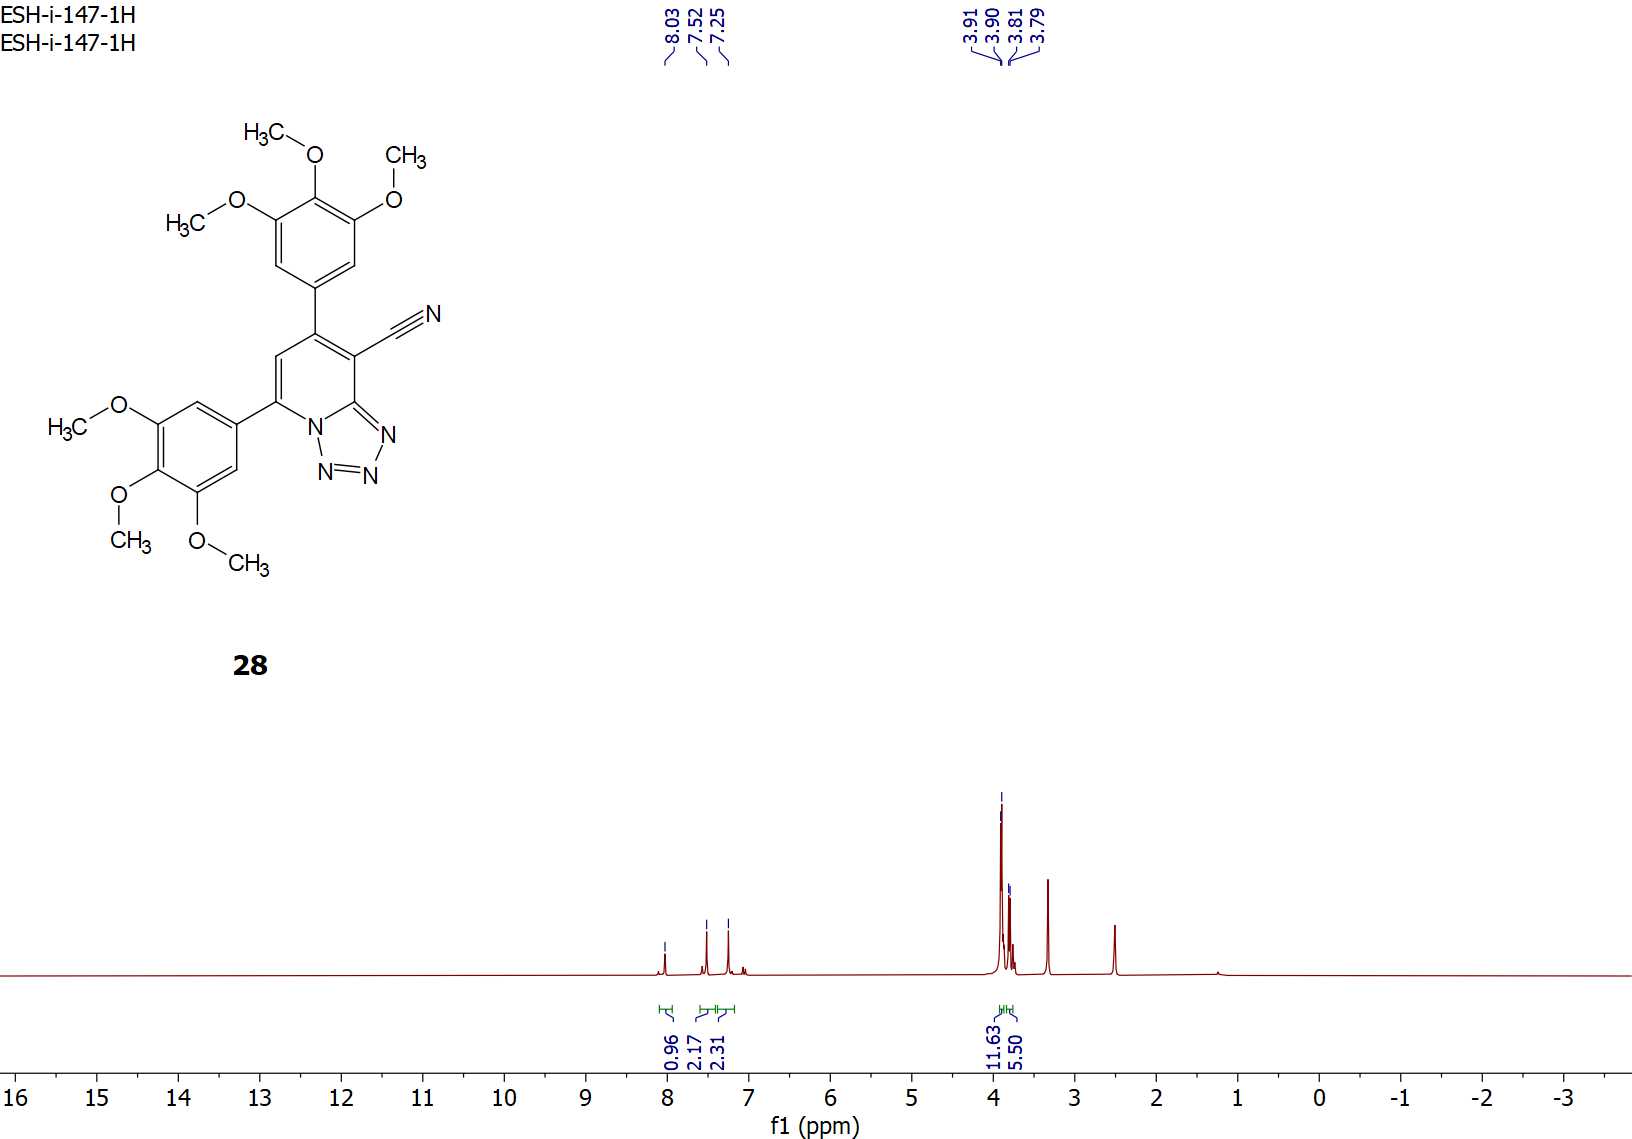


**Figure S37:** 1H-NMR spectrum of compound 28.


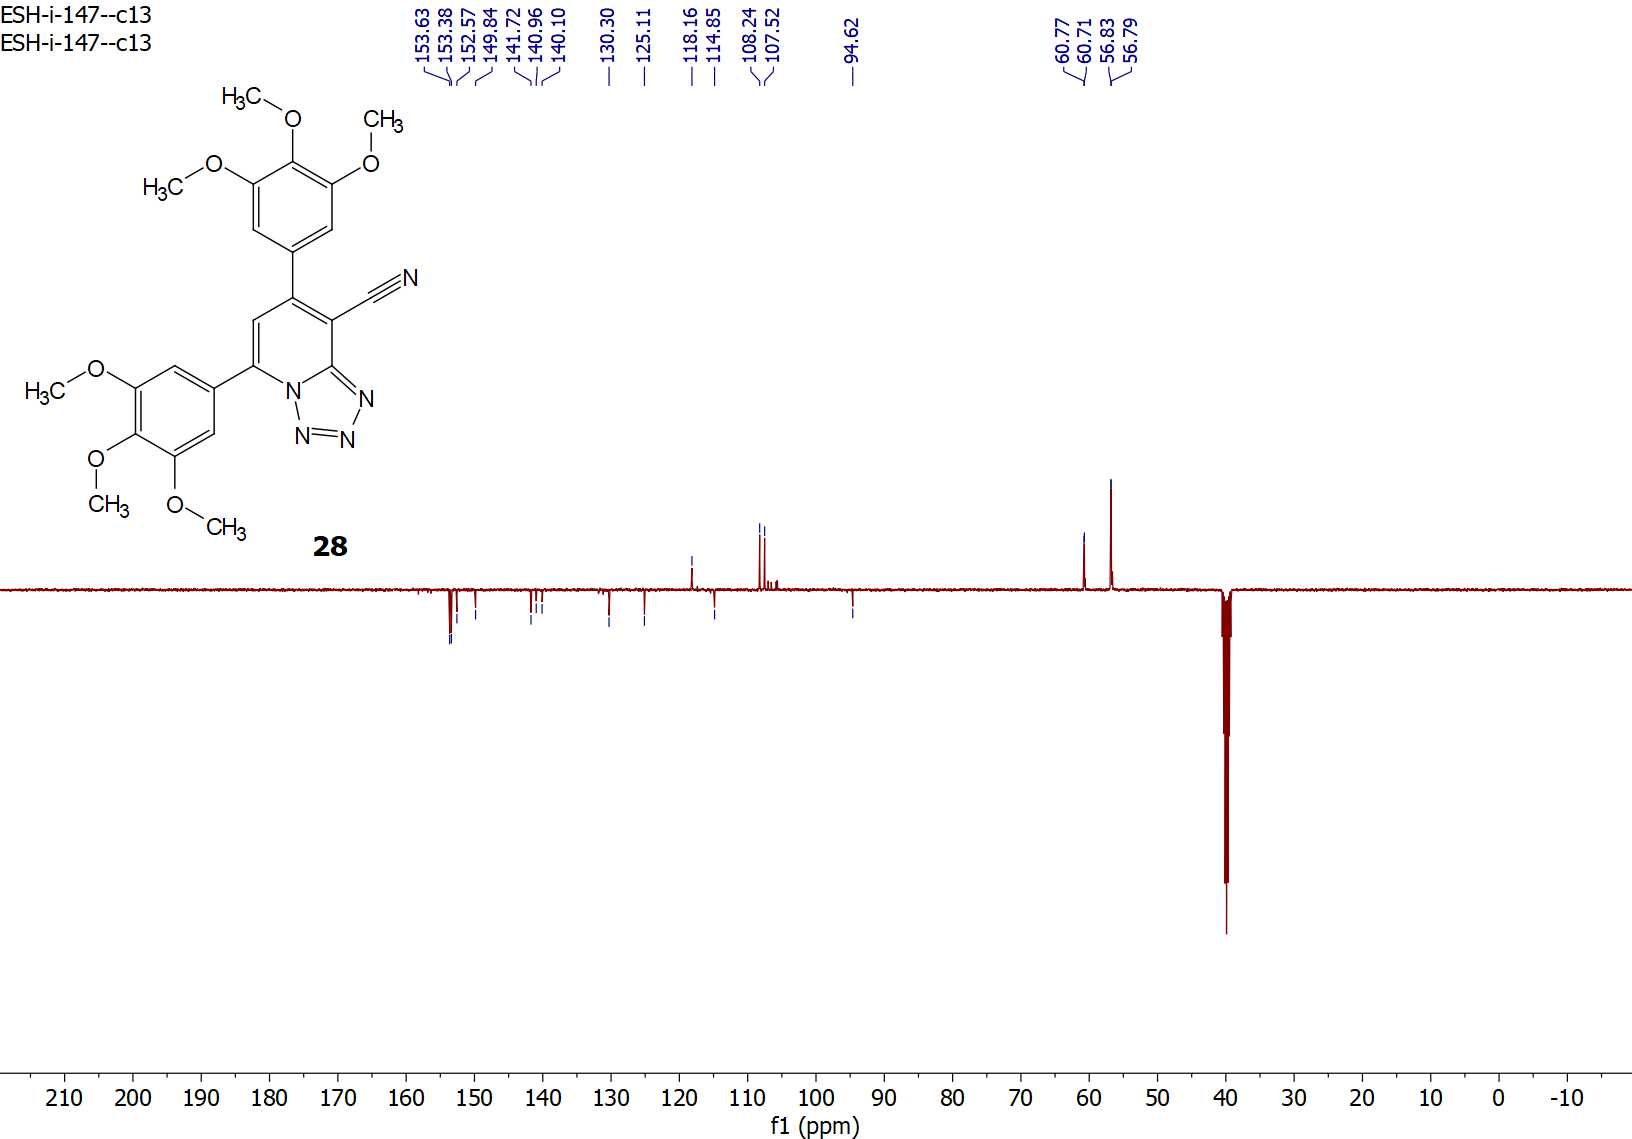


**Figure S38:** 13C-APT NMR spectrum of compound 28.


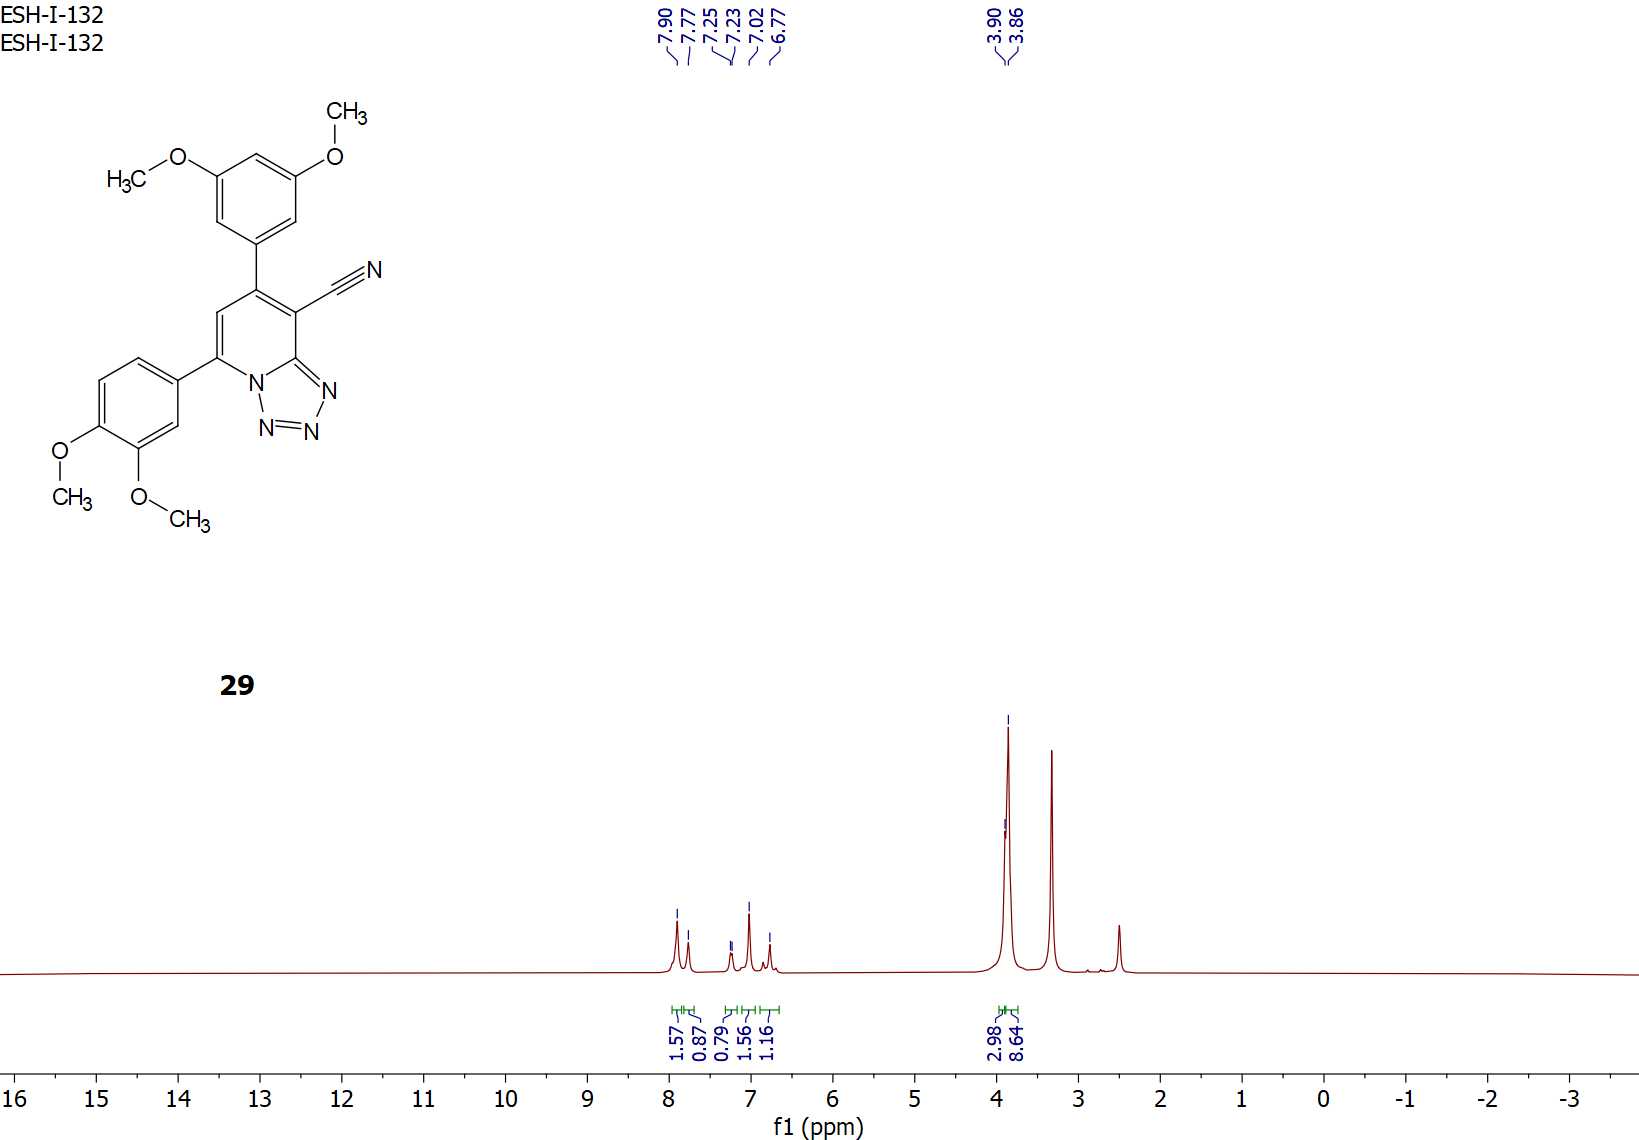


**Figure S39:** 1H-NMR spectrum of compound 29.


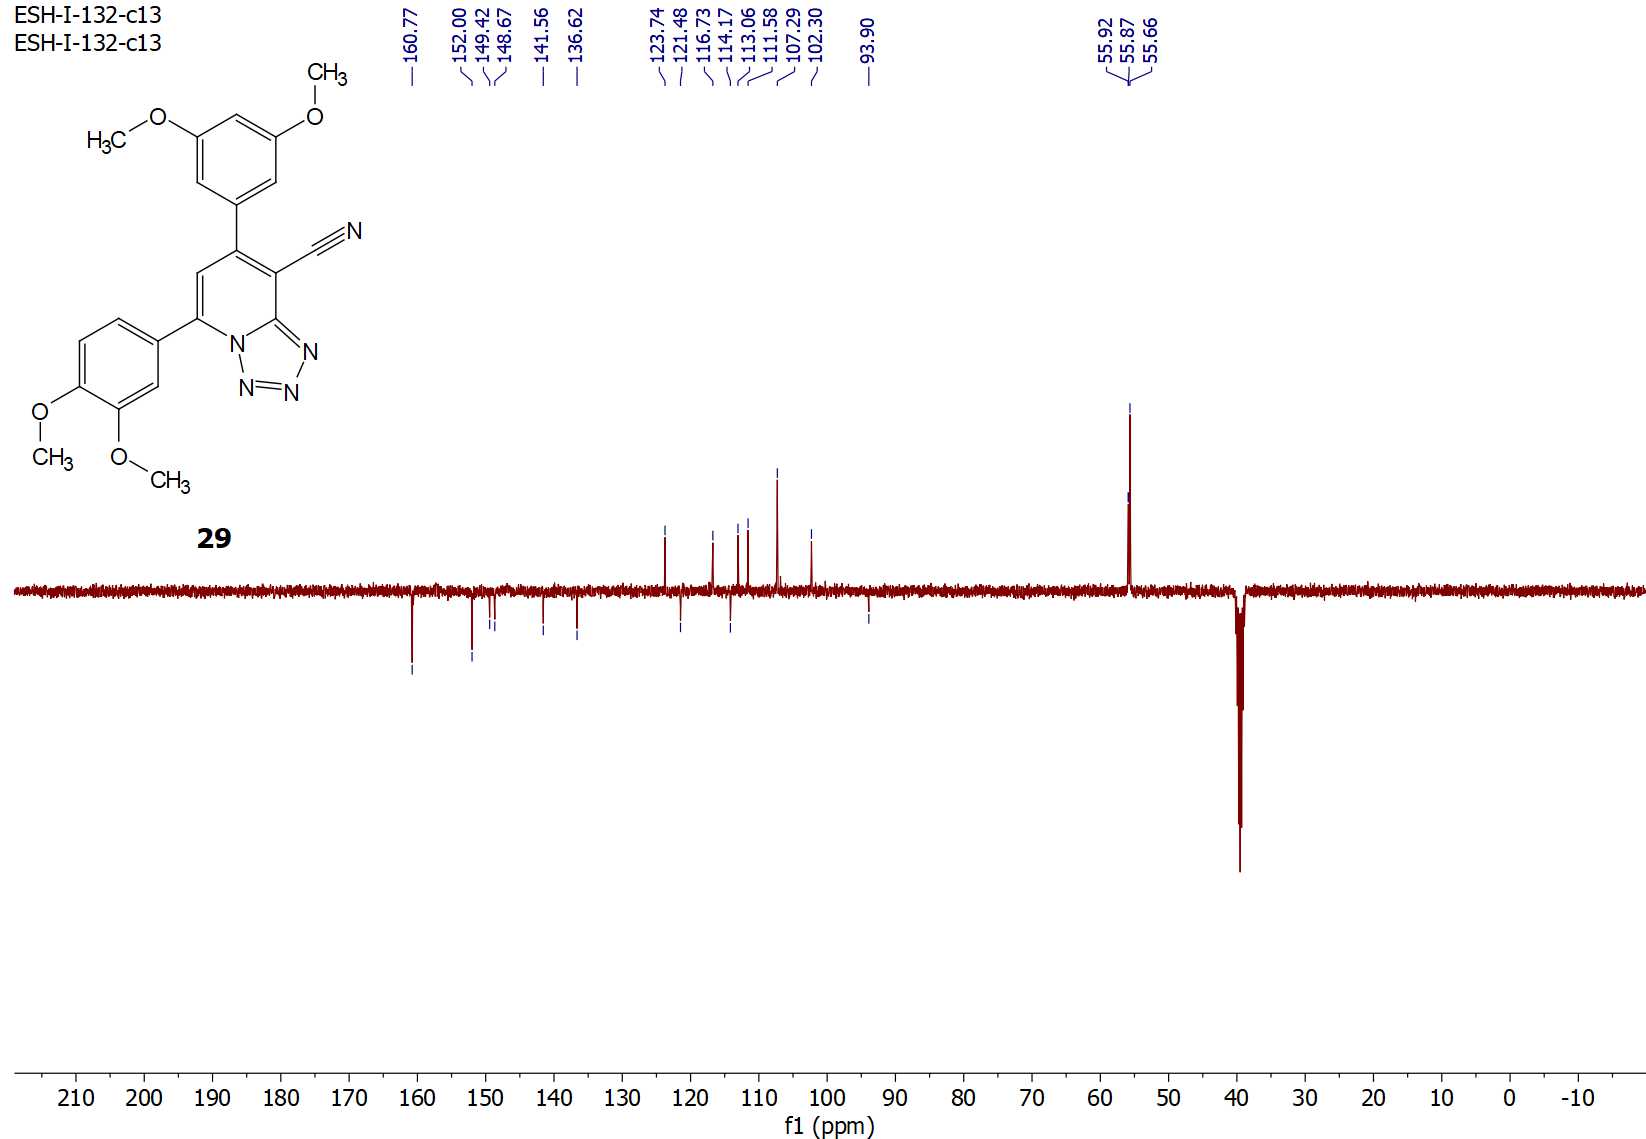


**Figure S40:** 13C-APT NMR spectrum of compound 29.


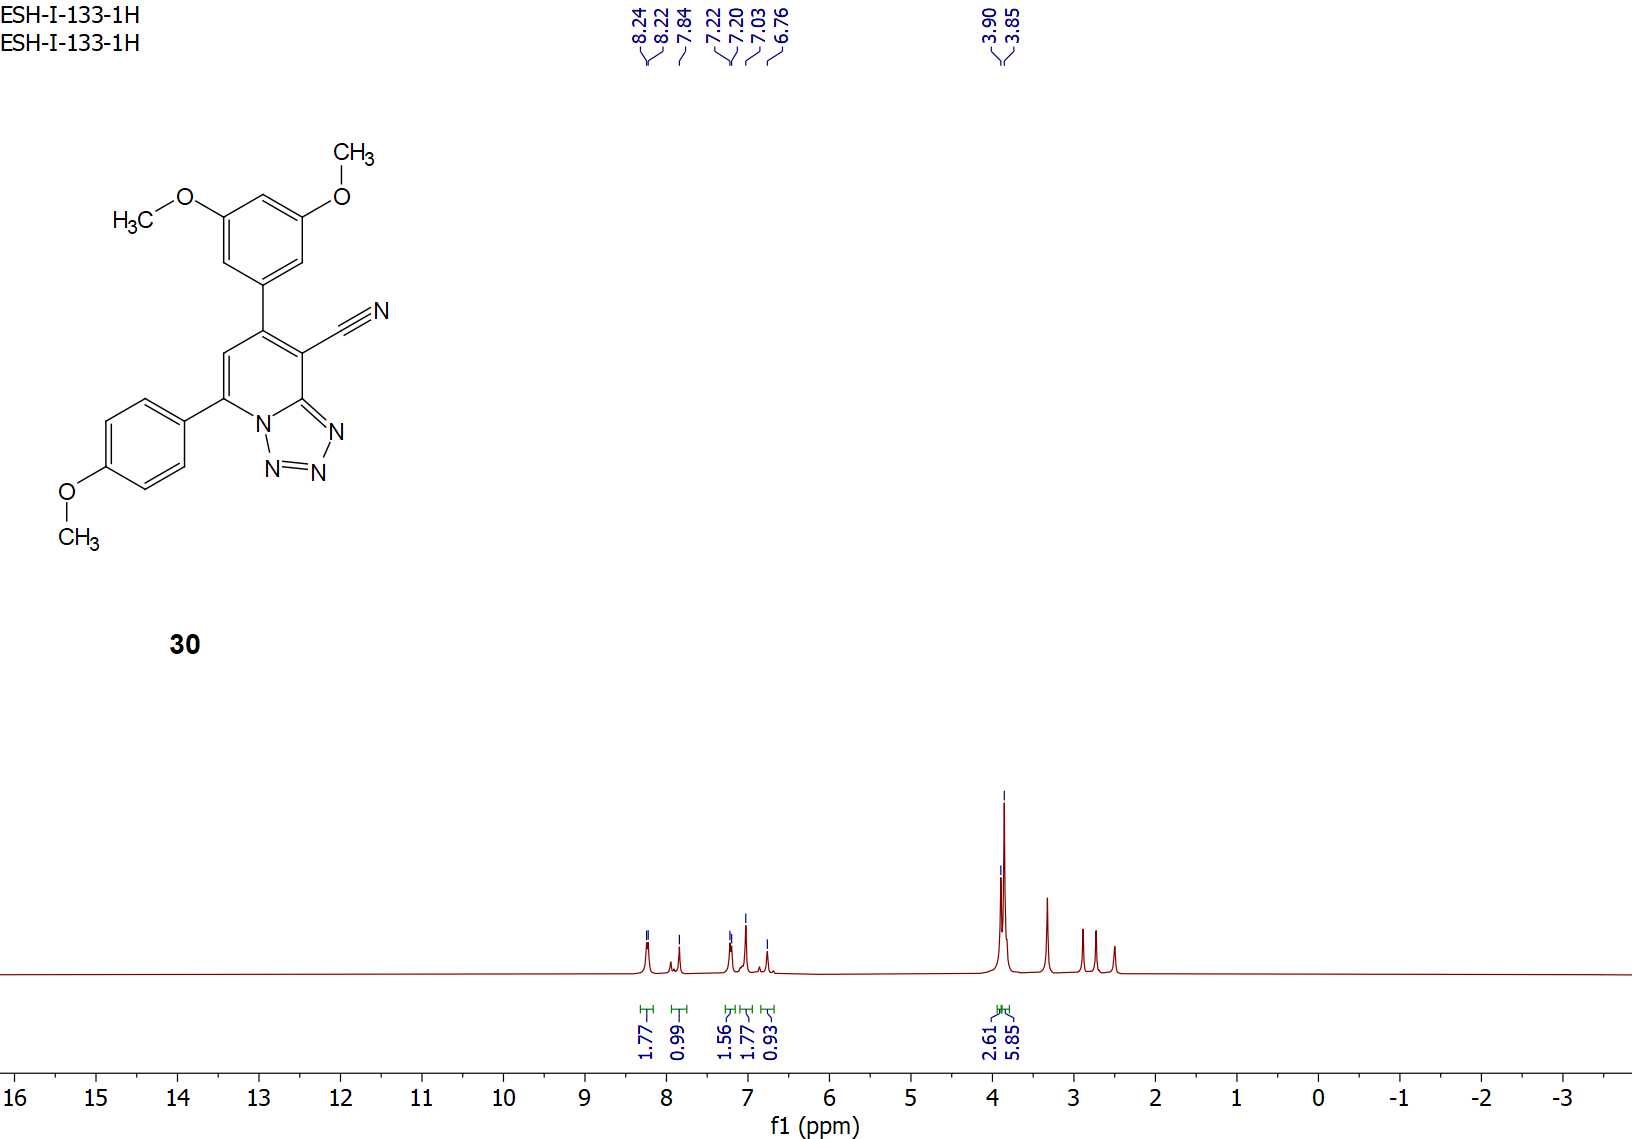


**Figure S41:** 1H-NMR spectrum of compound 30.


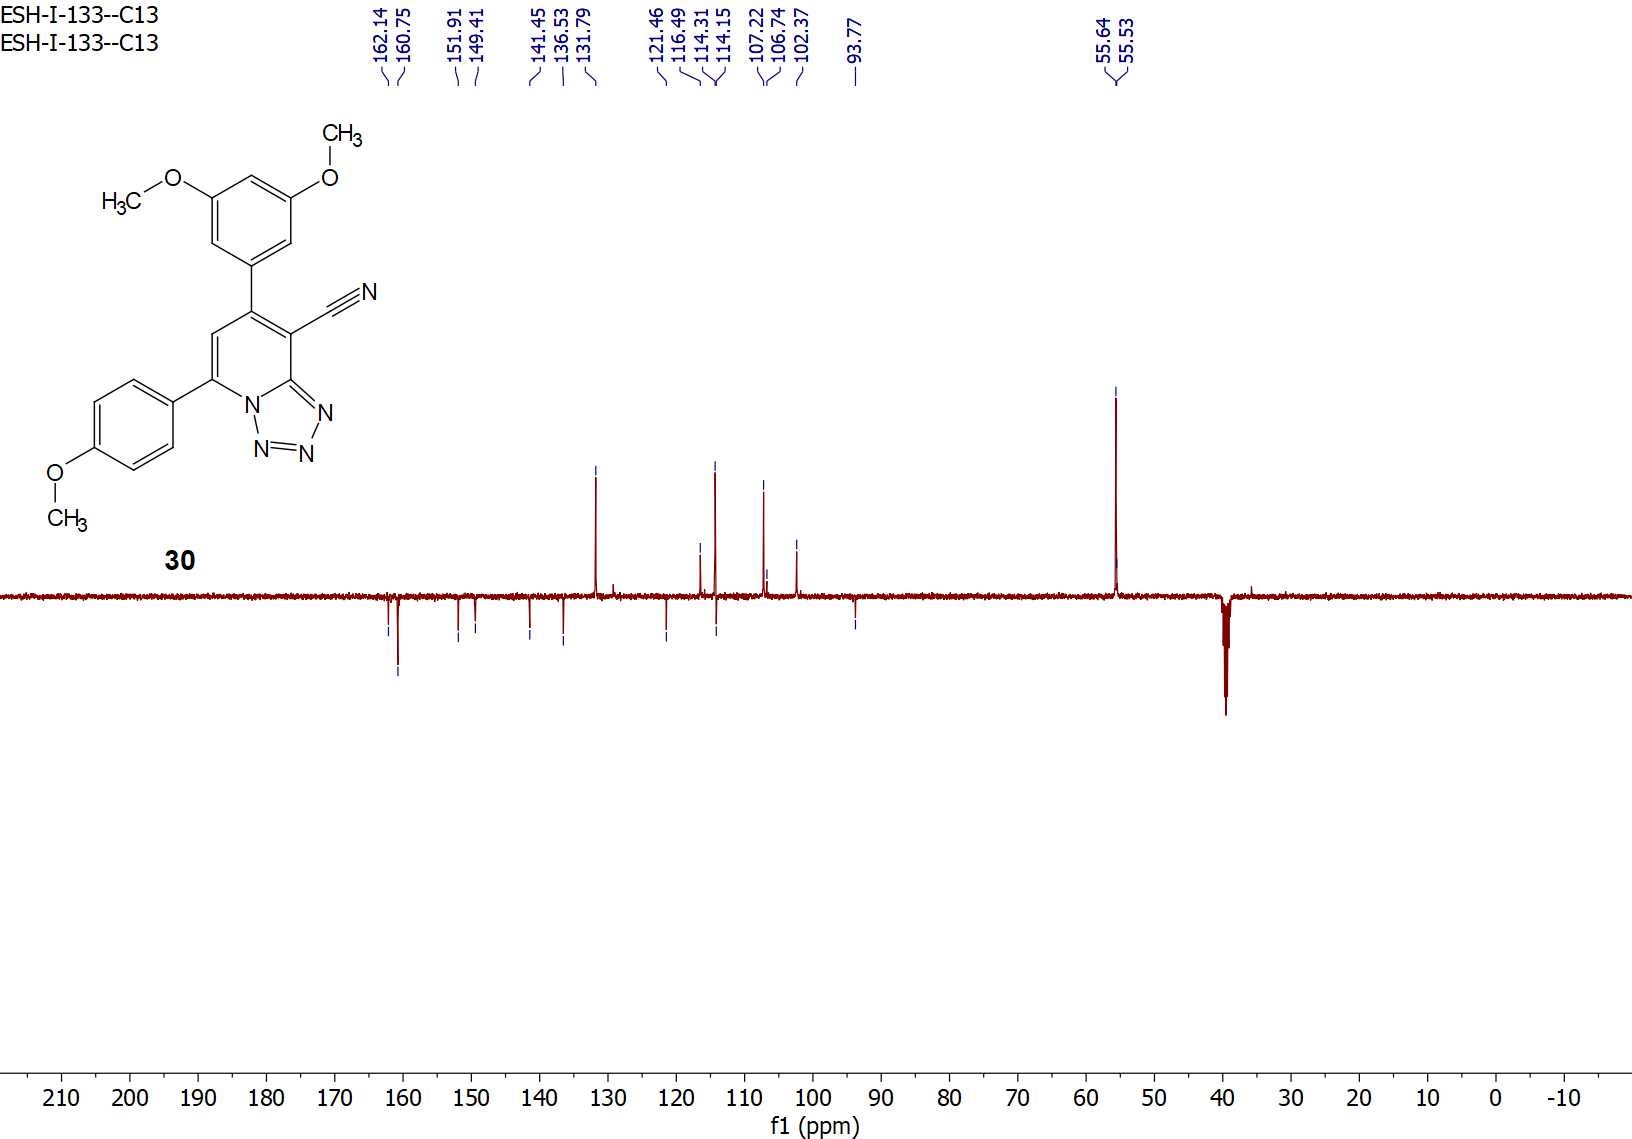


**Figure S42:** 13C-APT NMR spectrum of compound 30.


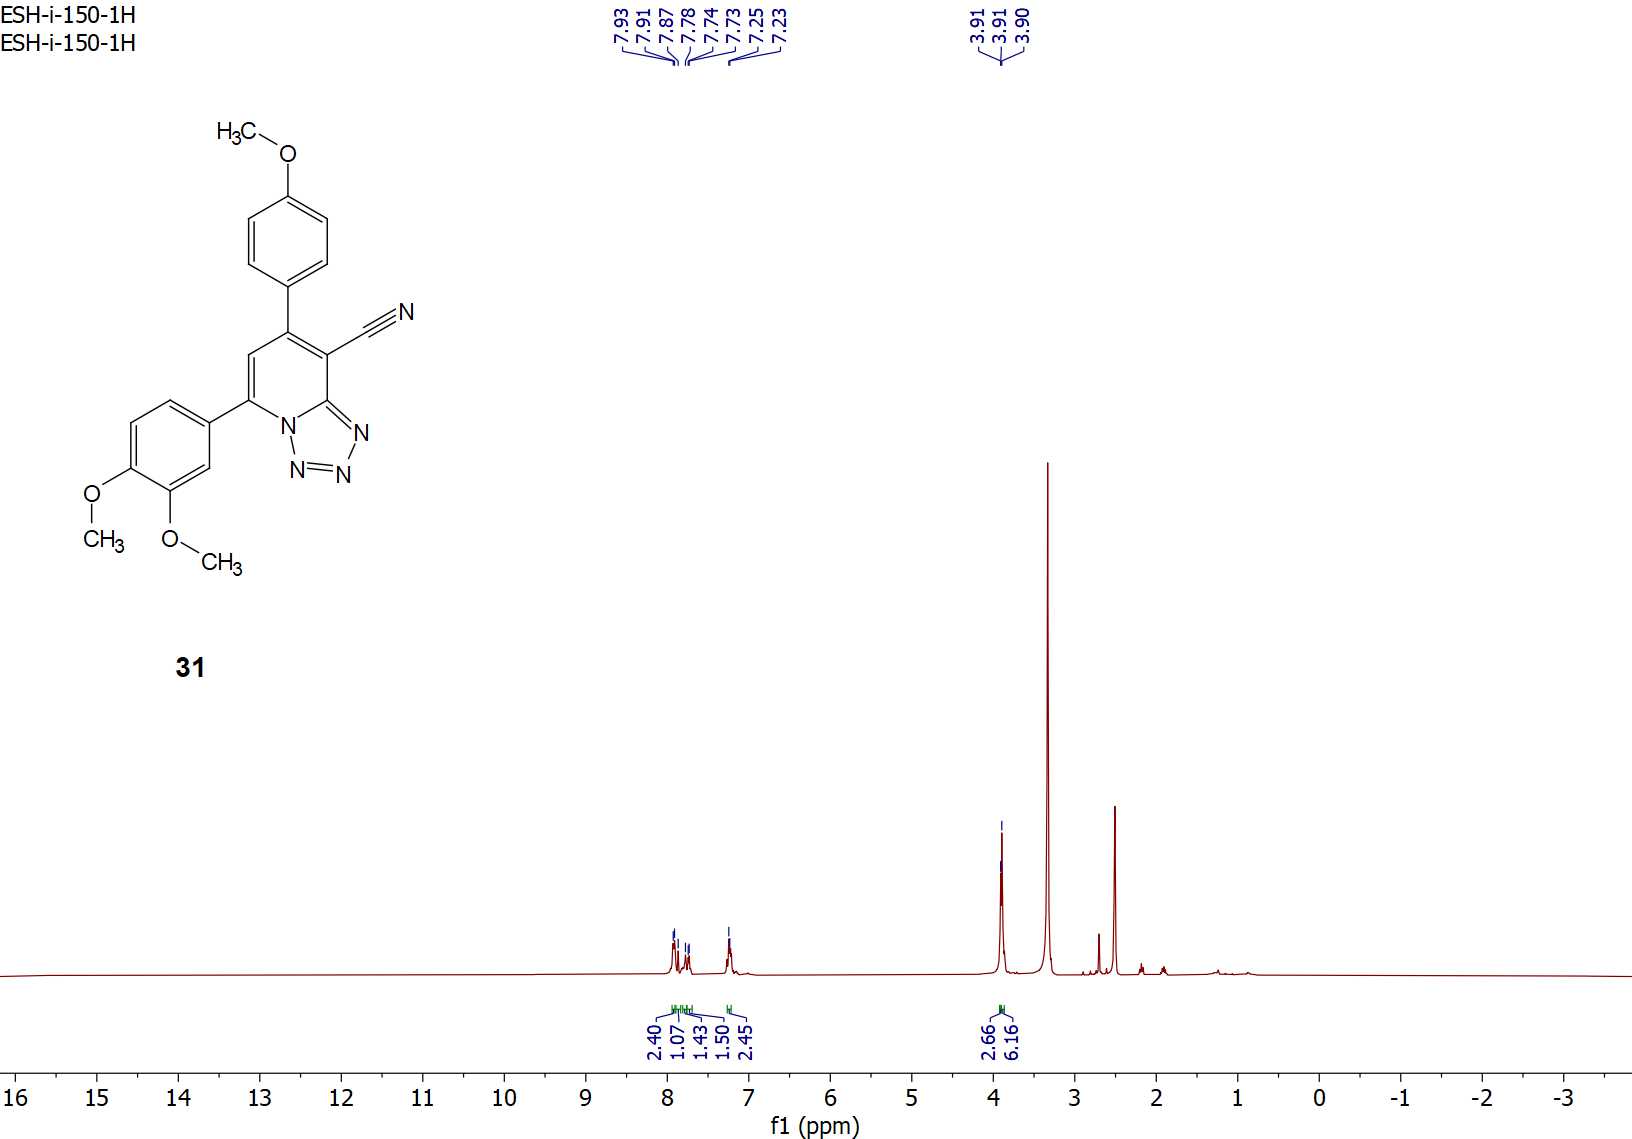


**Figure S43:** 1H-NMR spectrum of compound 31.


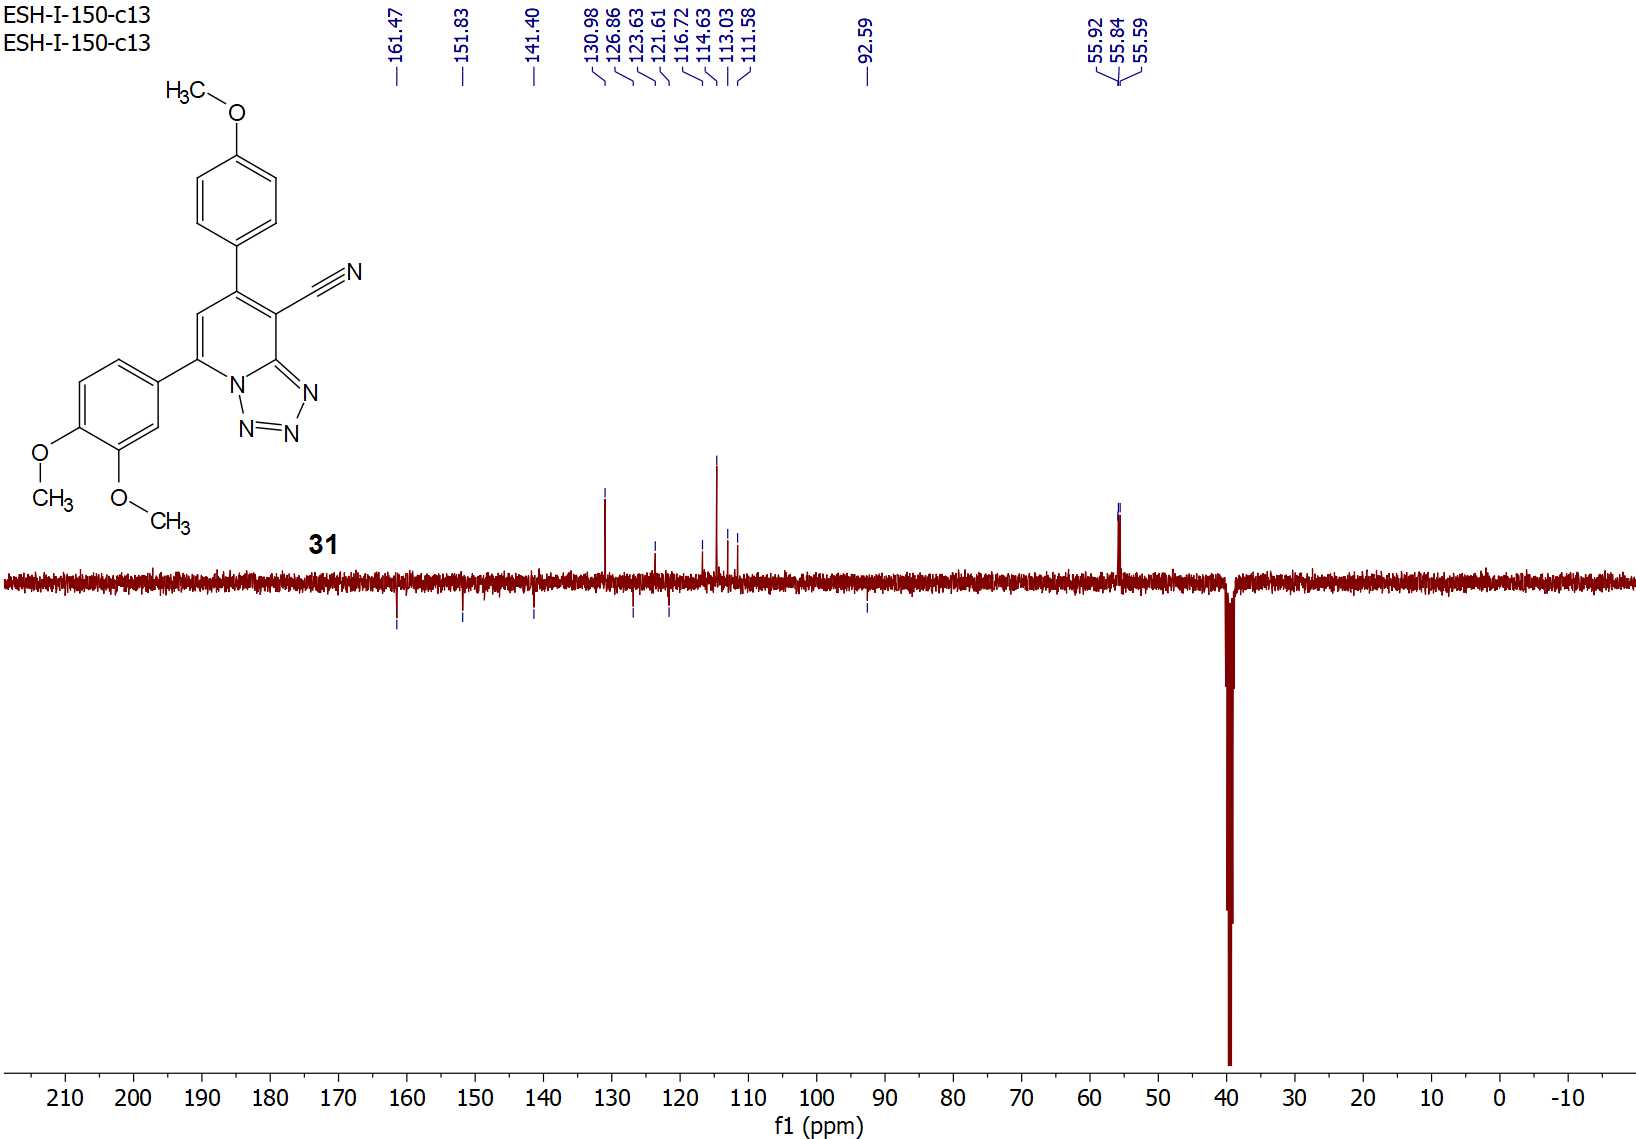


**Figure S44:** 13C-APT NMR spectrum of compound 31.


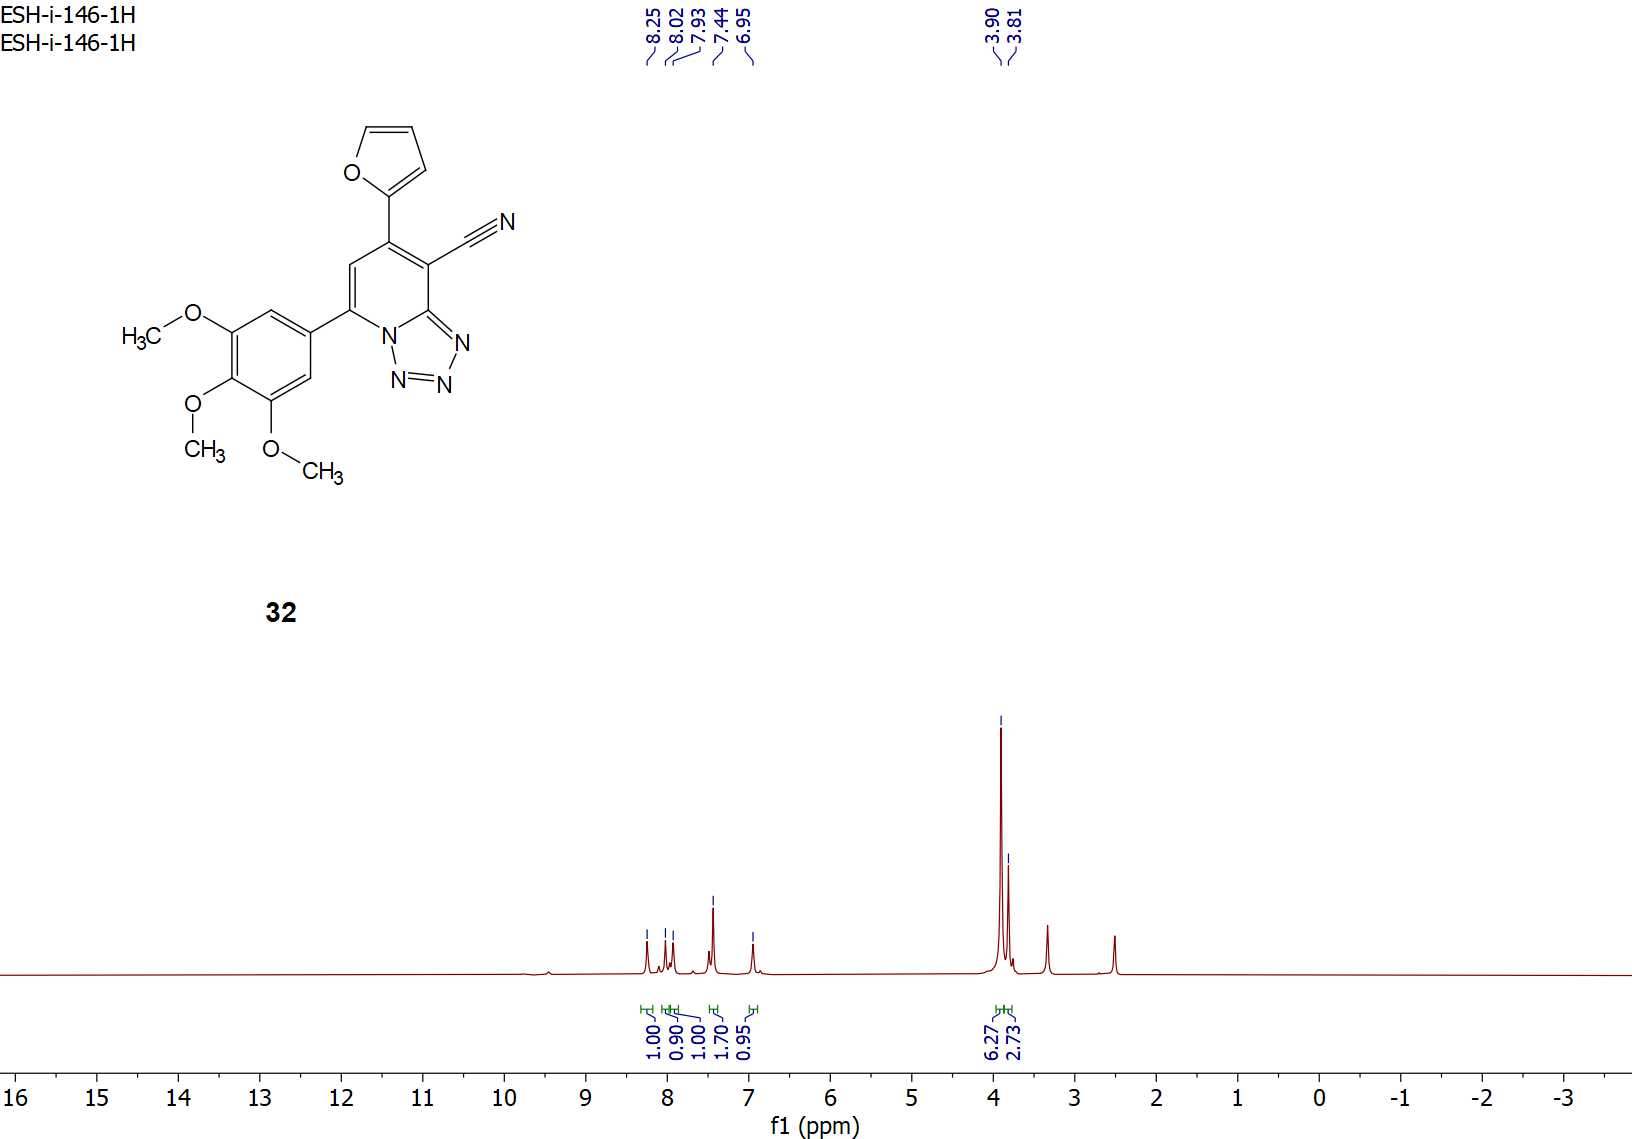


**Figure S45:** 1H-NMR spectrum of compound 32.


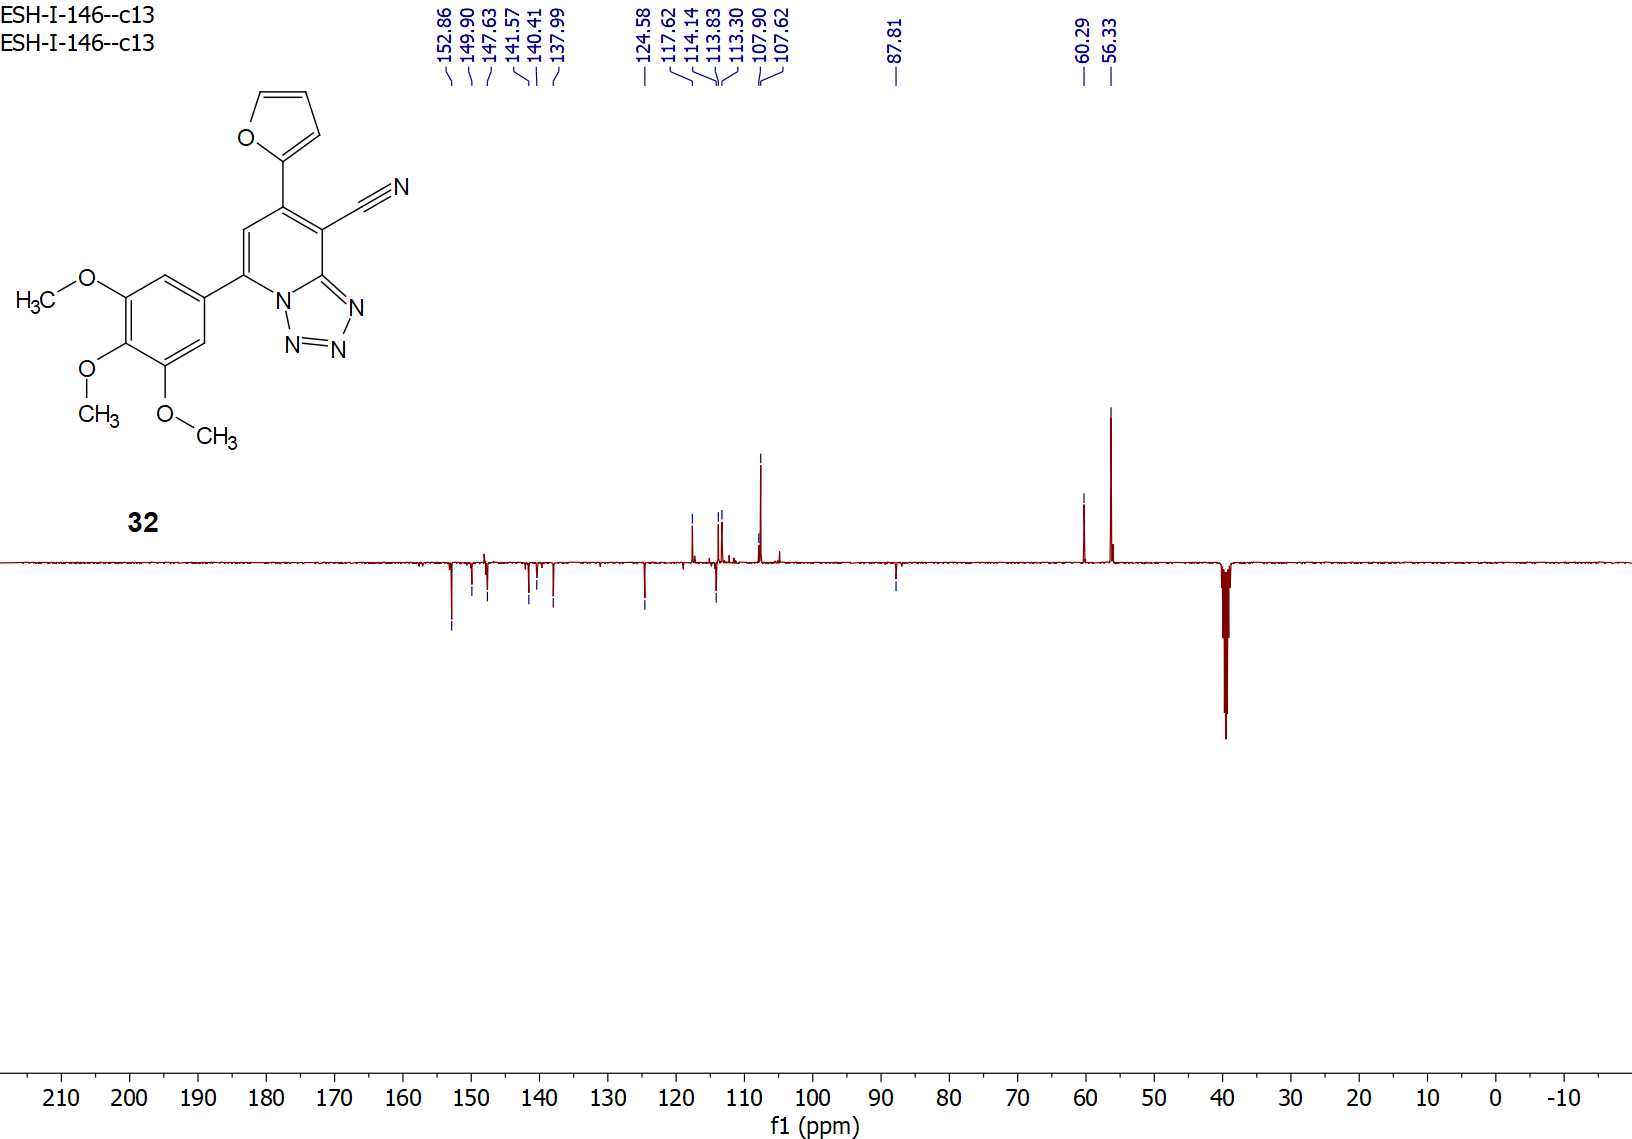


**Figure S46:** 13C-APT NMR spectrum of compound 32.


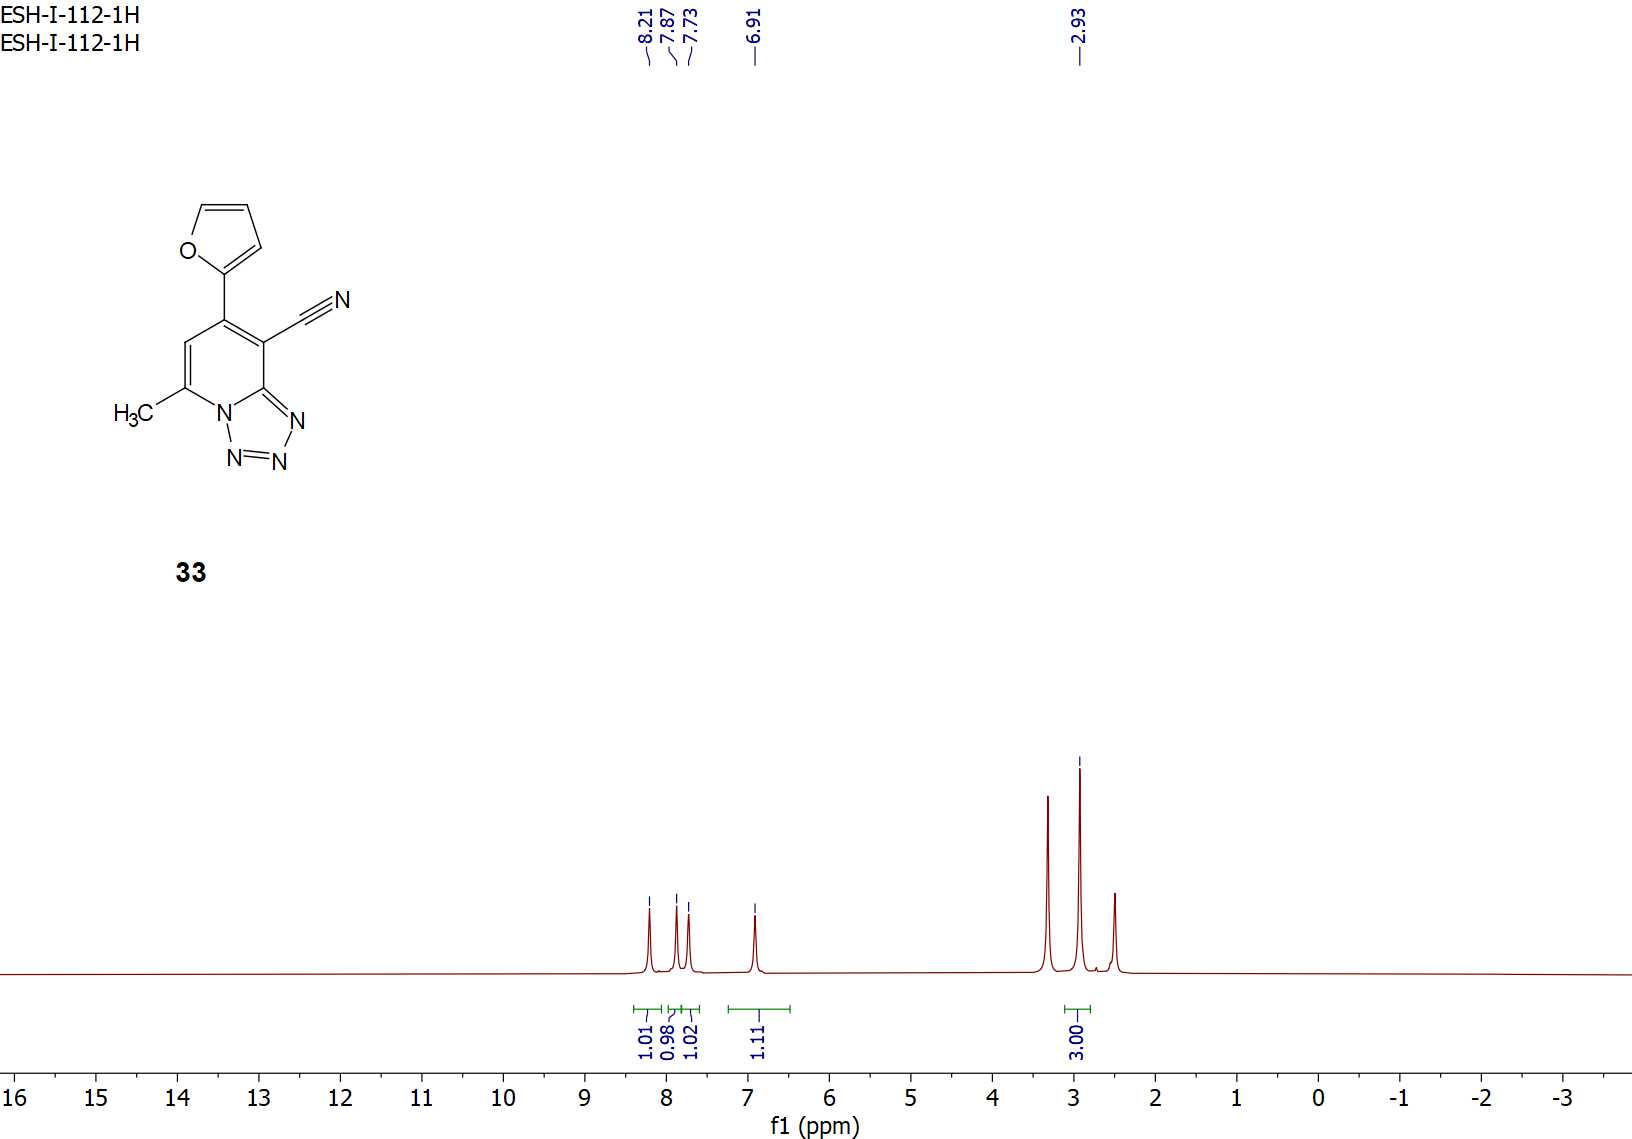


**Figure S47:** 1H-NMR spectrum of compound 33.


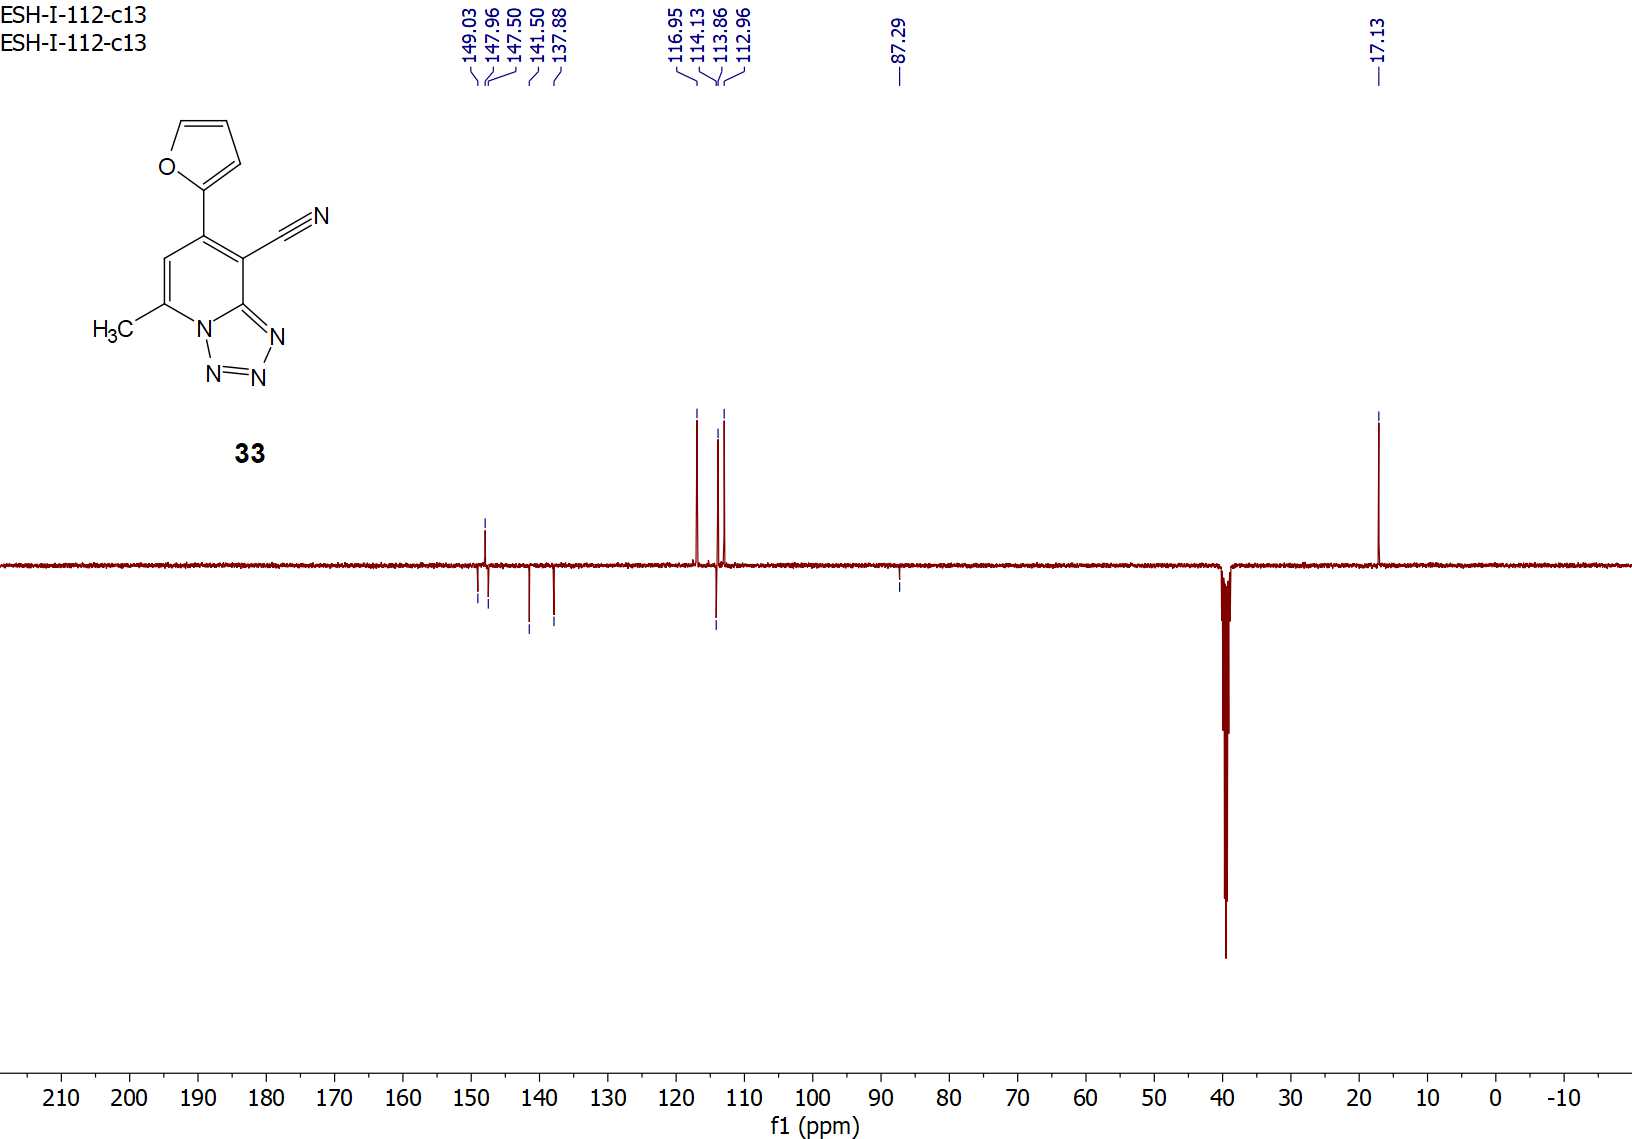


**Figure S48:** 13C-APT NMR spectrum of compound 33.


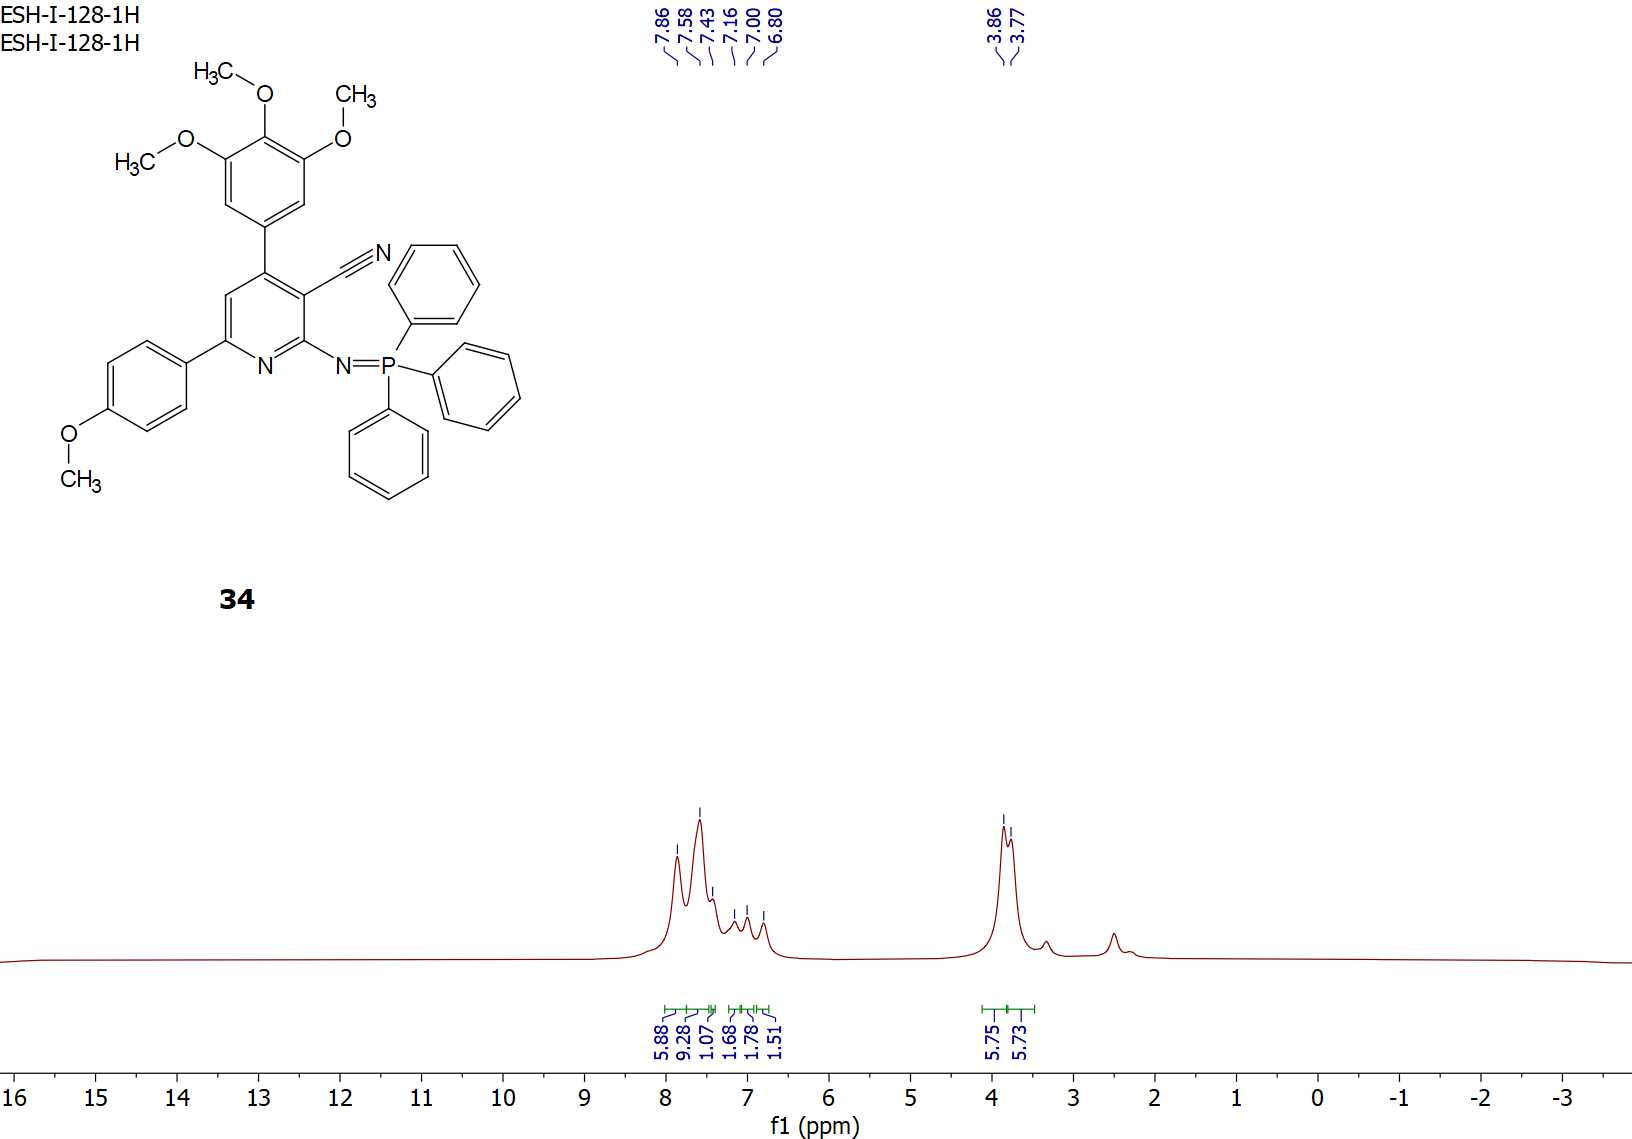


**Figure S49:** 1H-NMR spectrum of compound 34.


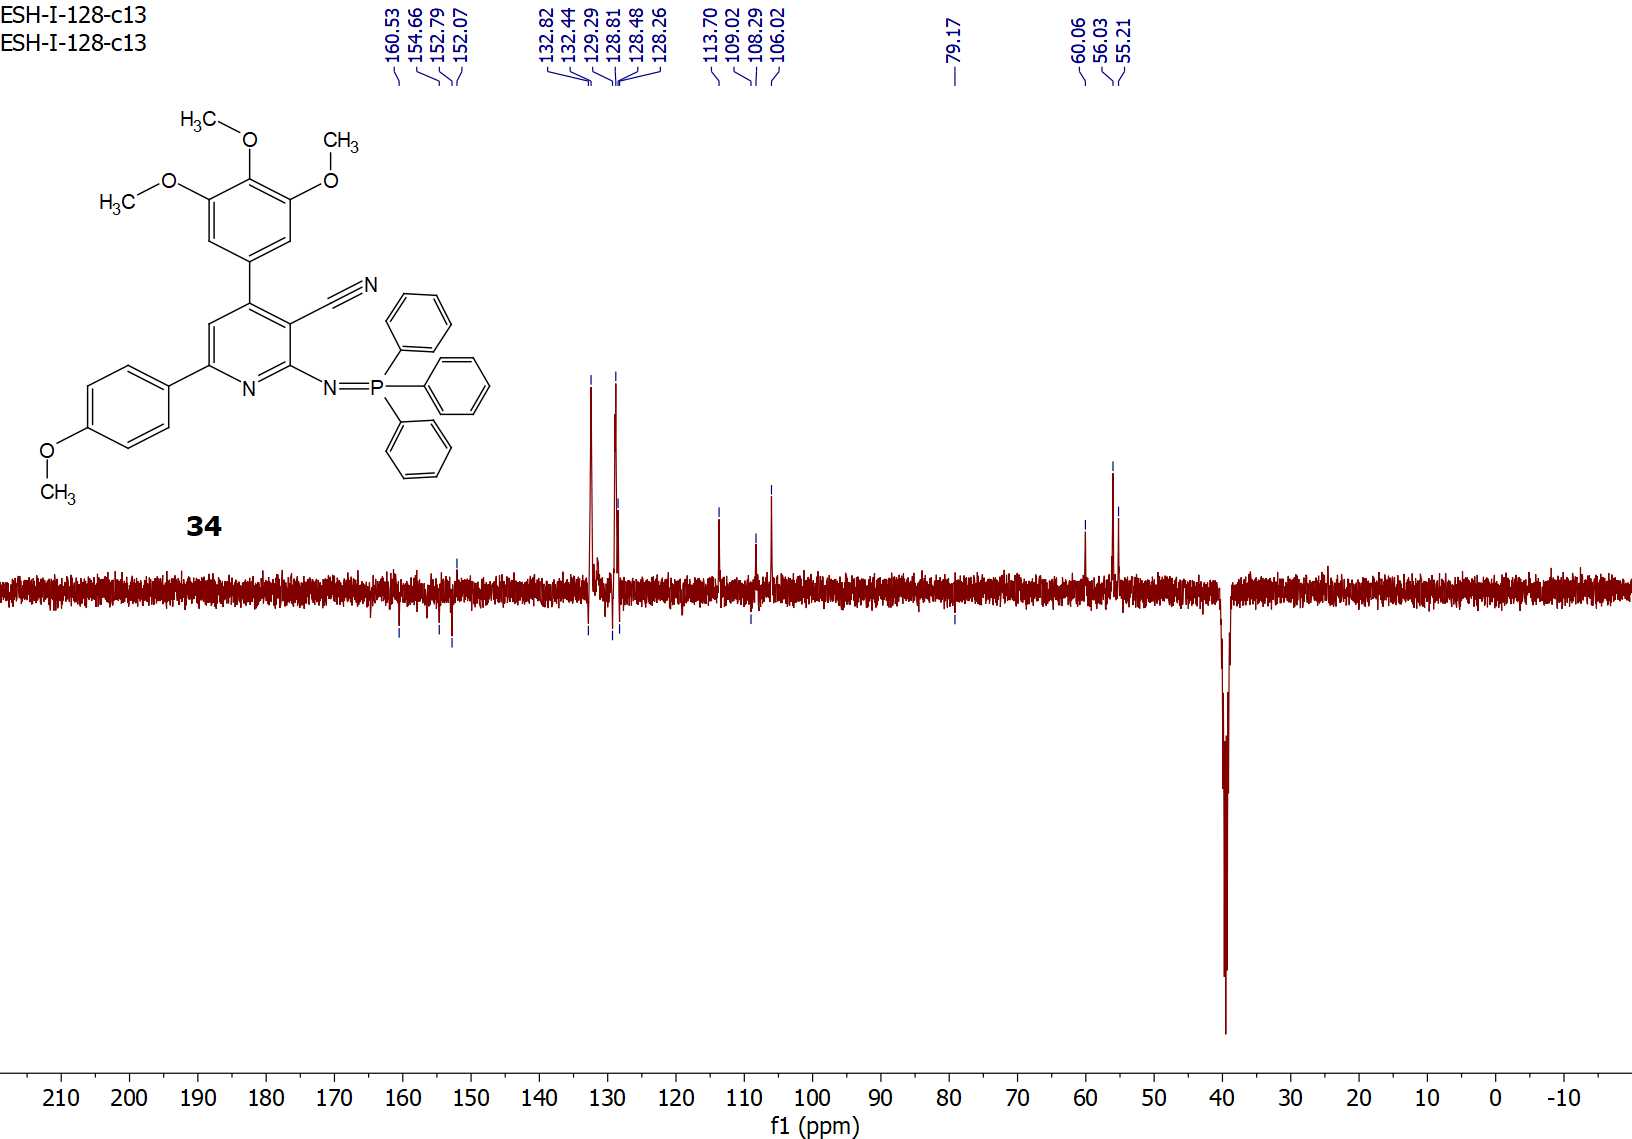


**Figure S50:** 13C-APT NMR spectrum of compound 34.


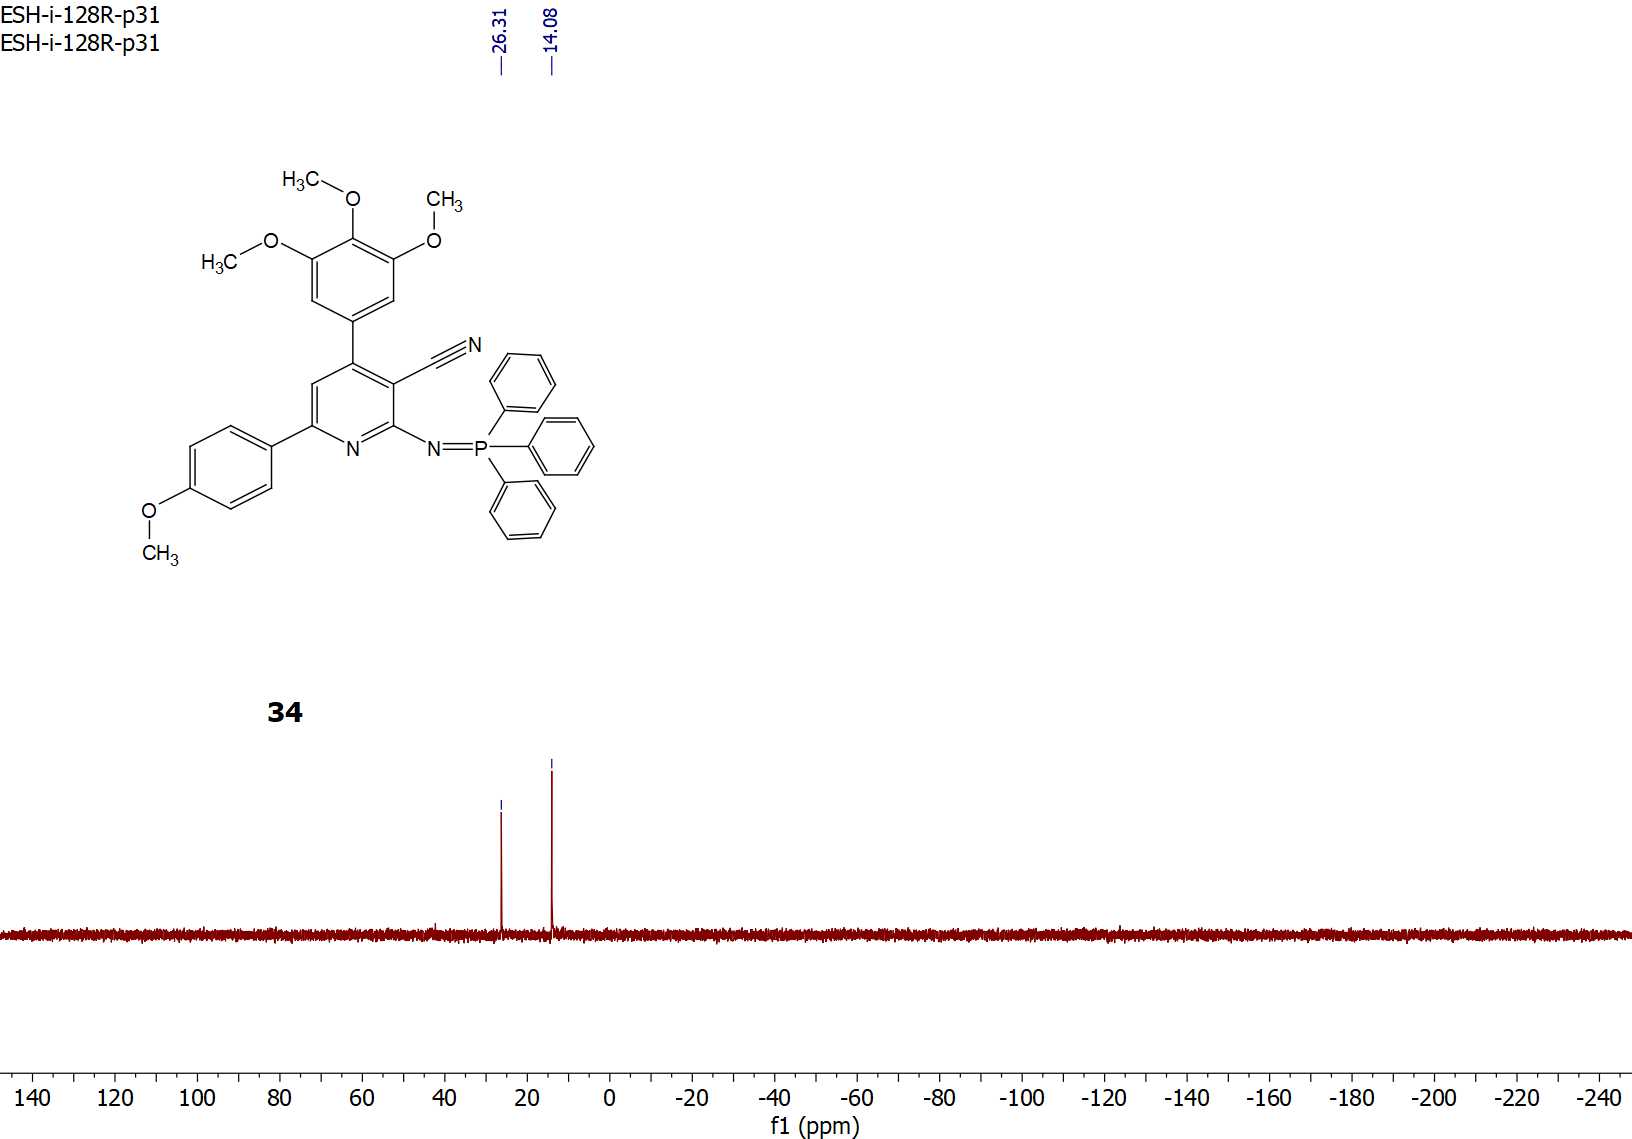


**Figure S51:** 31P-NMR spectrum of compound 34.


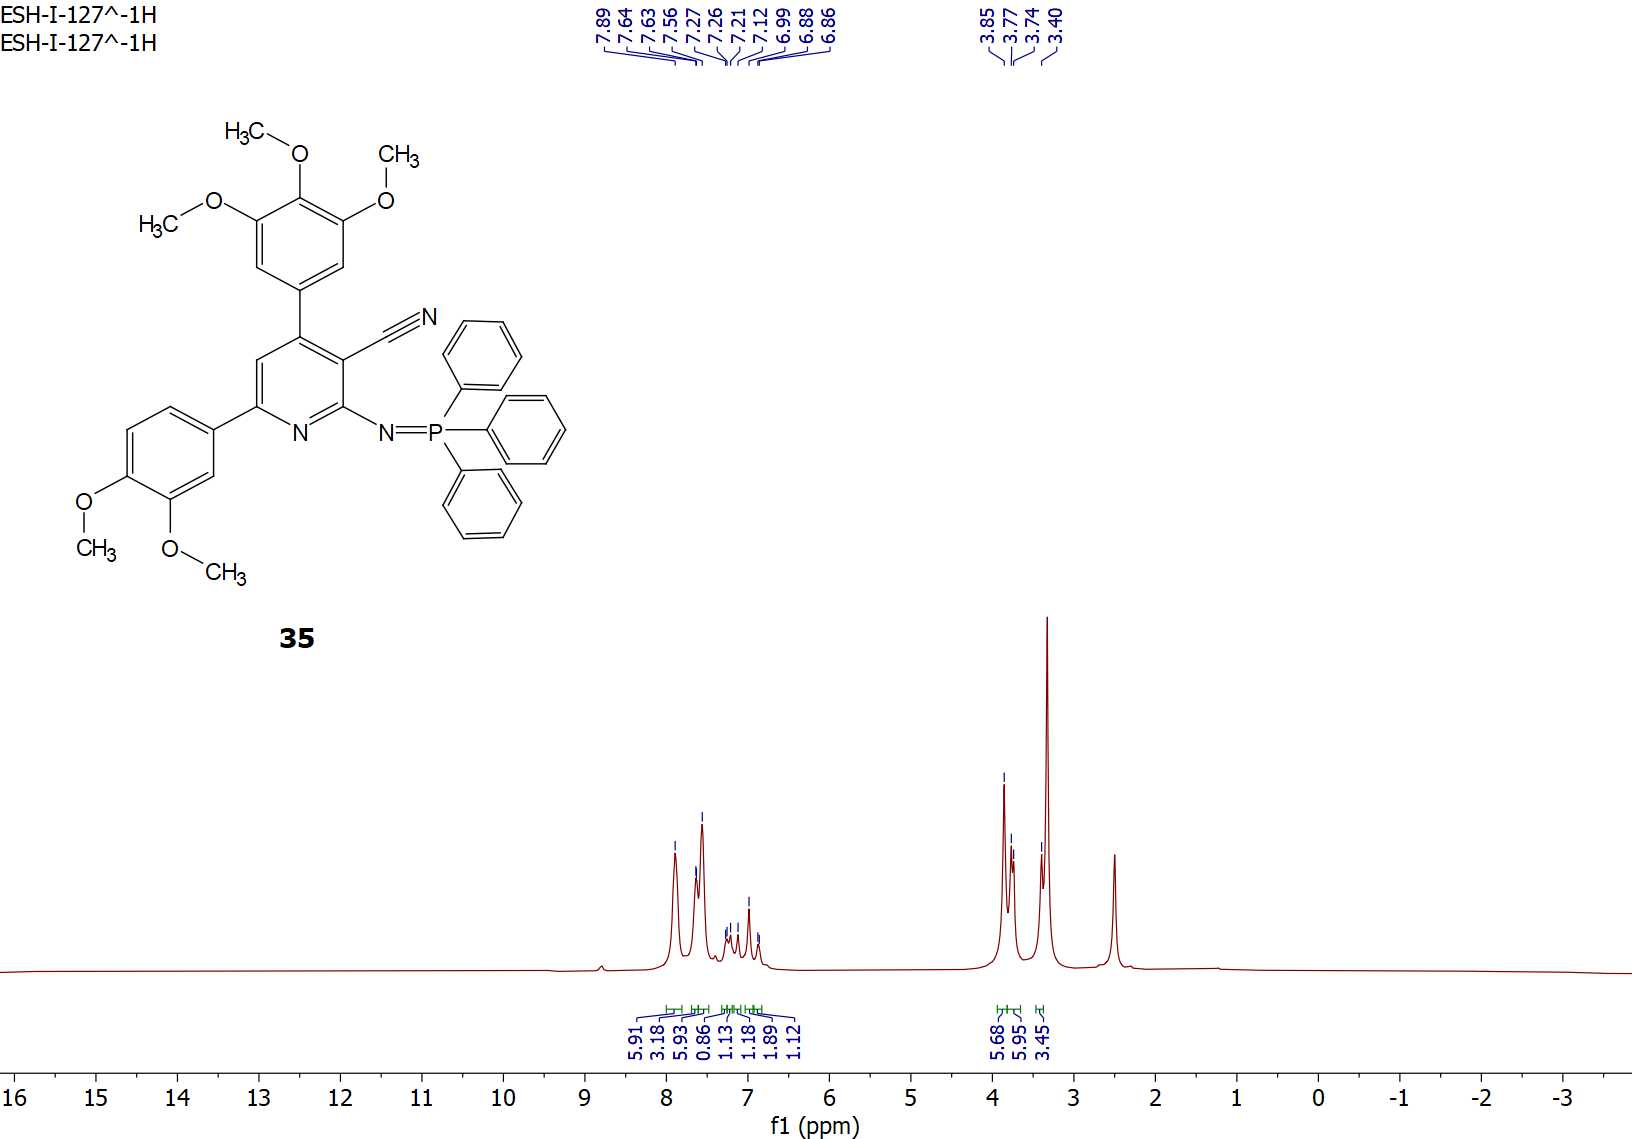


**Figure S52:** 1H-NMR spectrum of compound 35.


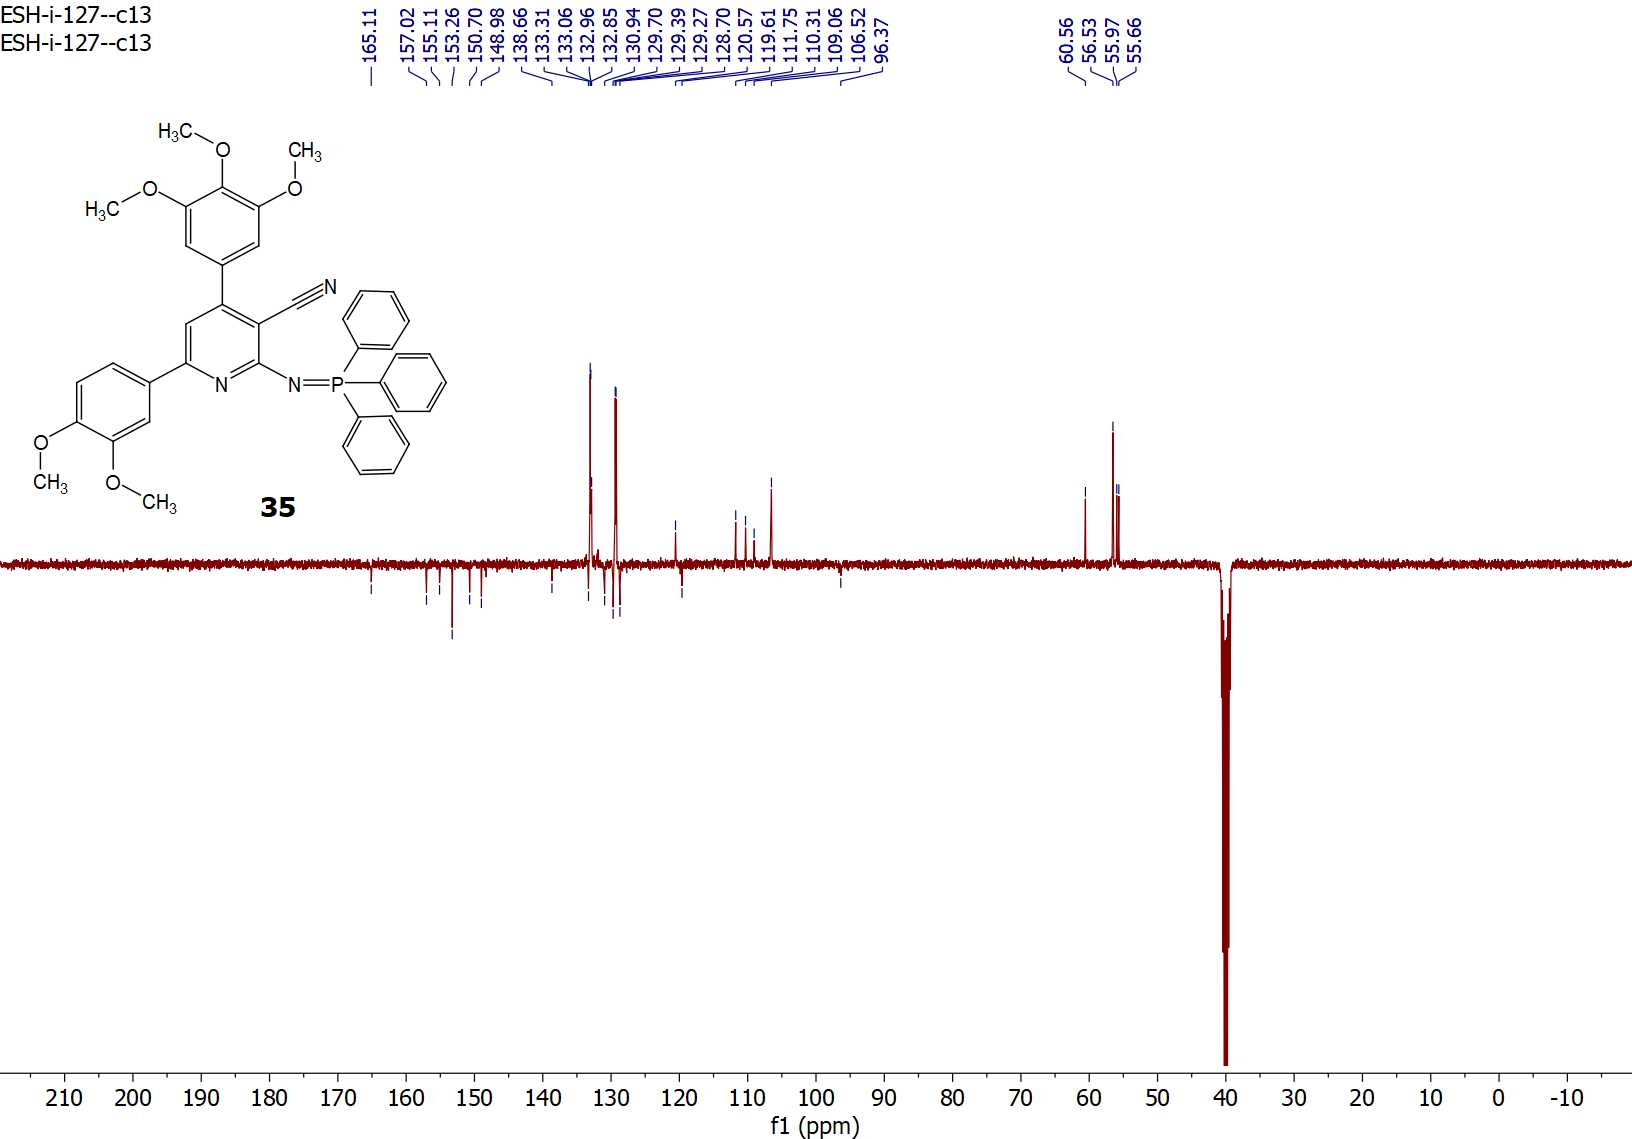


**Figure S53:** 13C-APT NMR spectrum of compound 35.


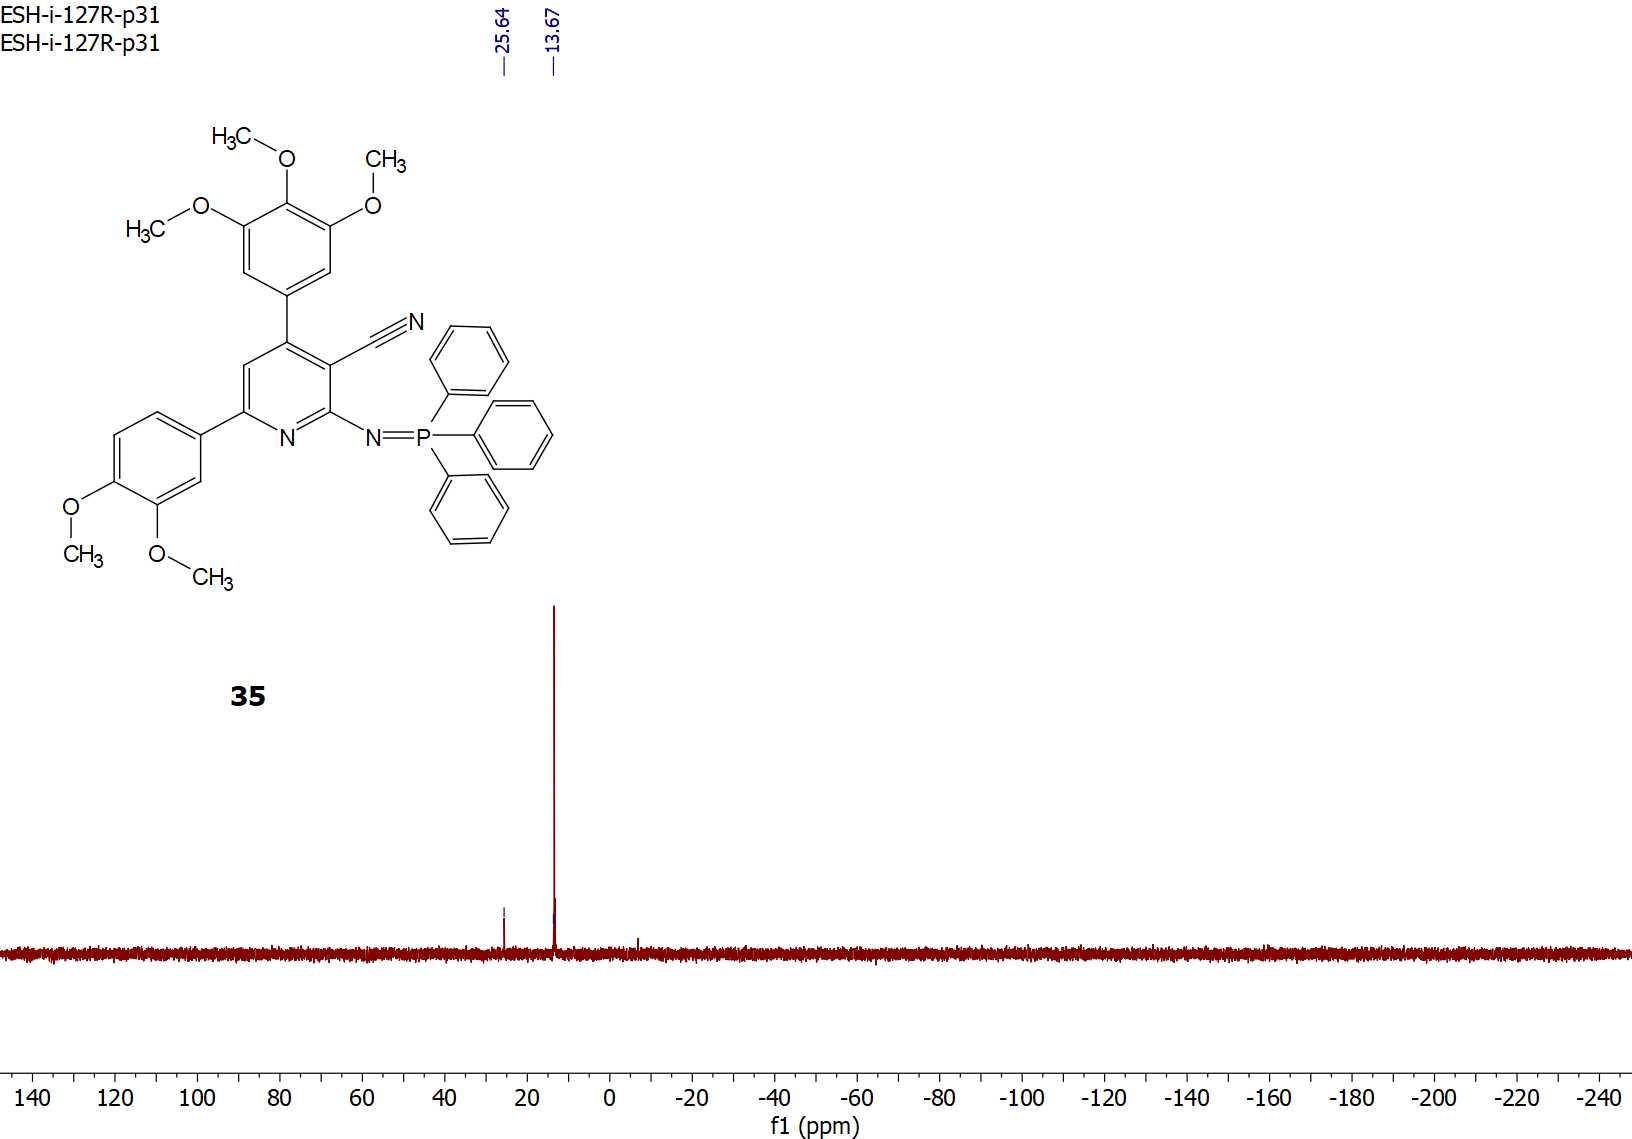


**Figure S54:** 31P-NMR spectrum of compound 35.


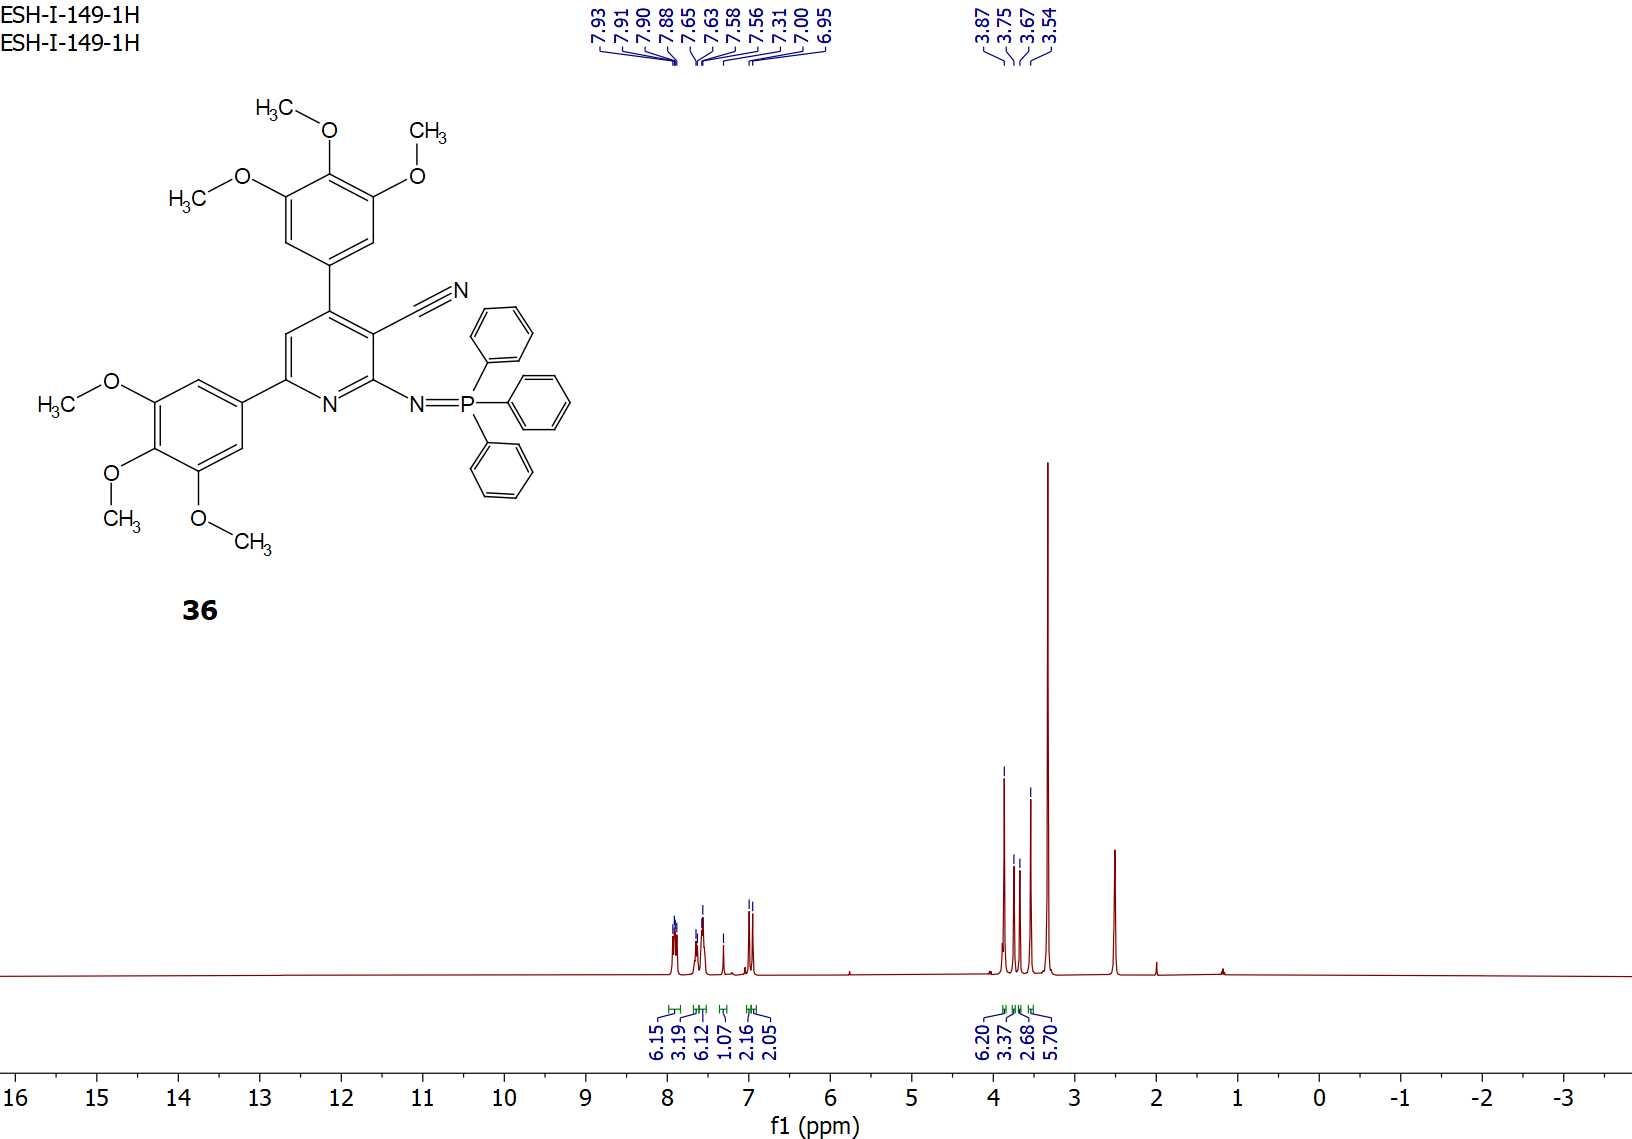


**Figure S55:** 1H-NMR spectrum of compound 36.


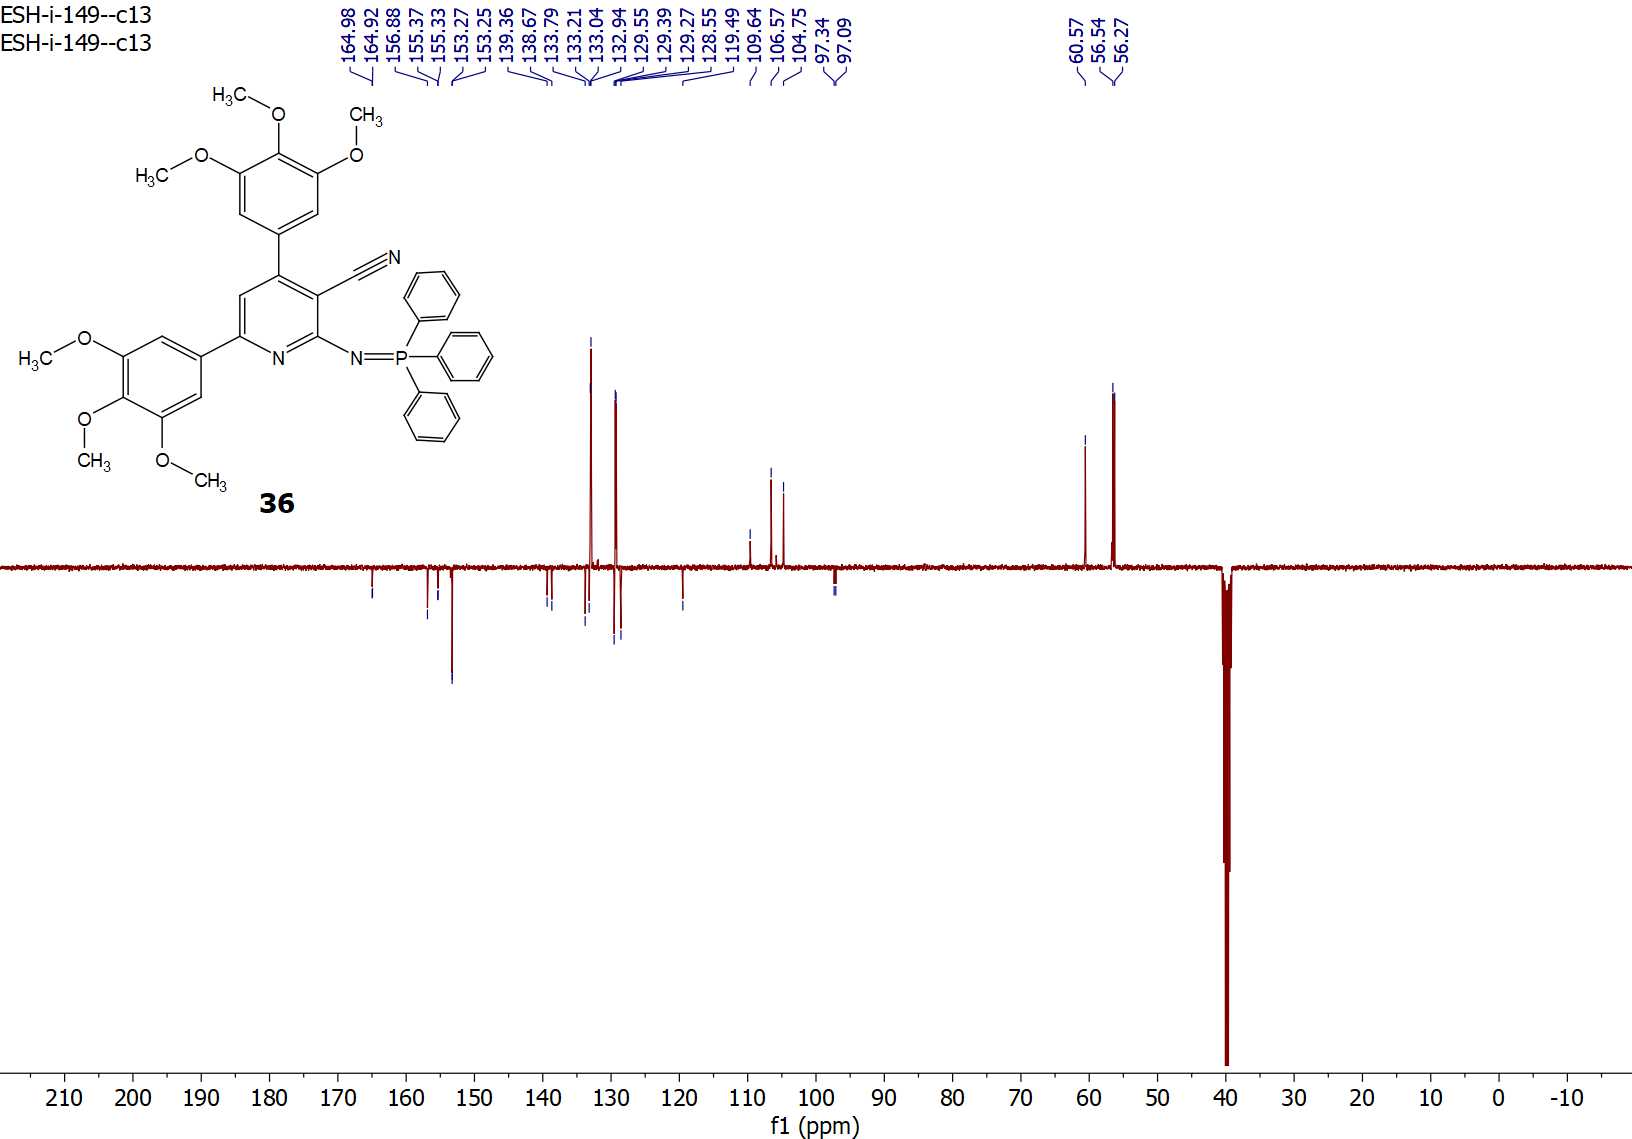


**Figure S56:** 13C-APT NMR spectrum of compound 36.


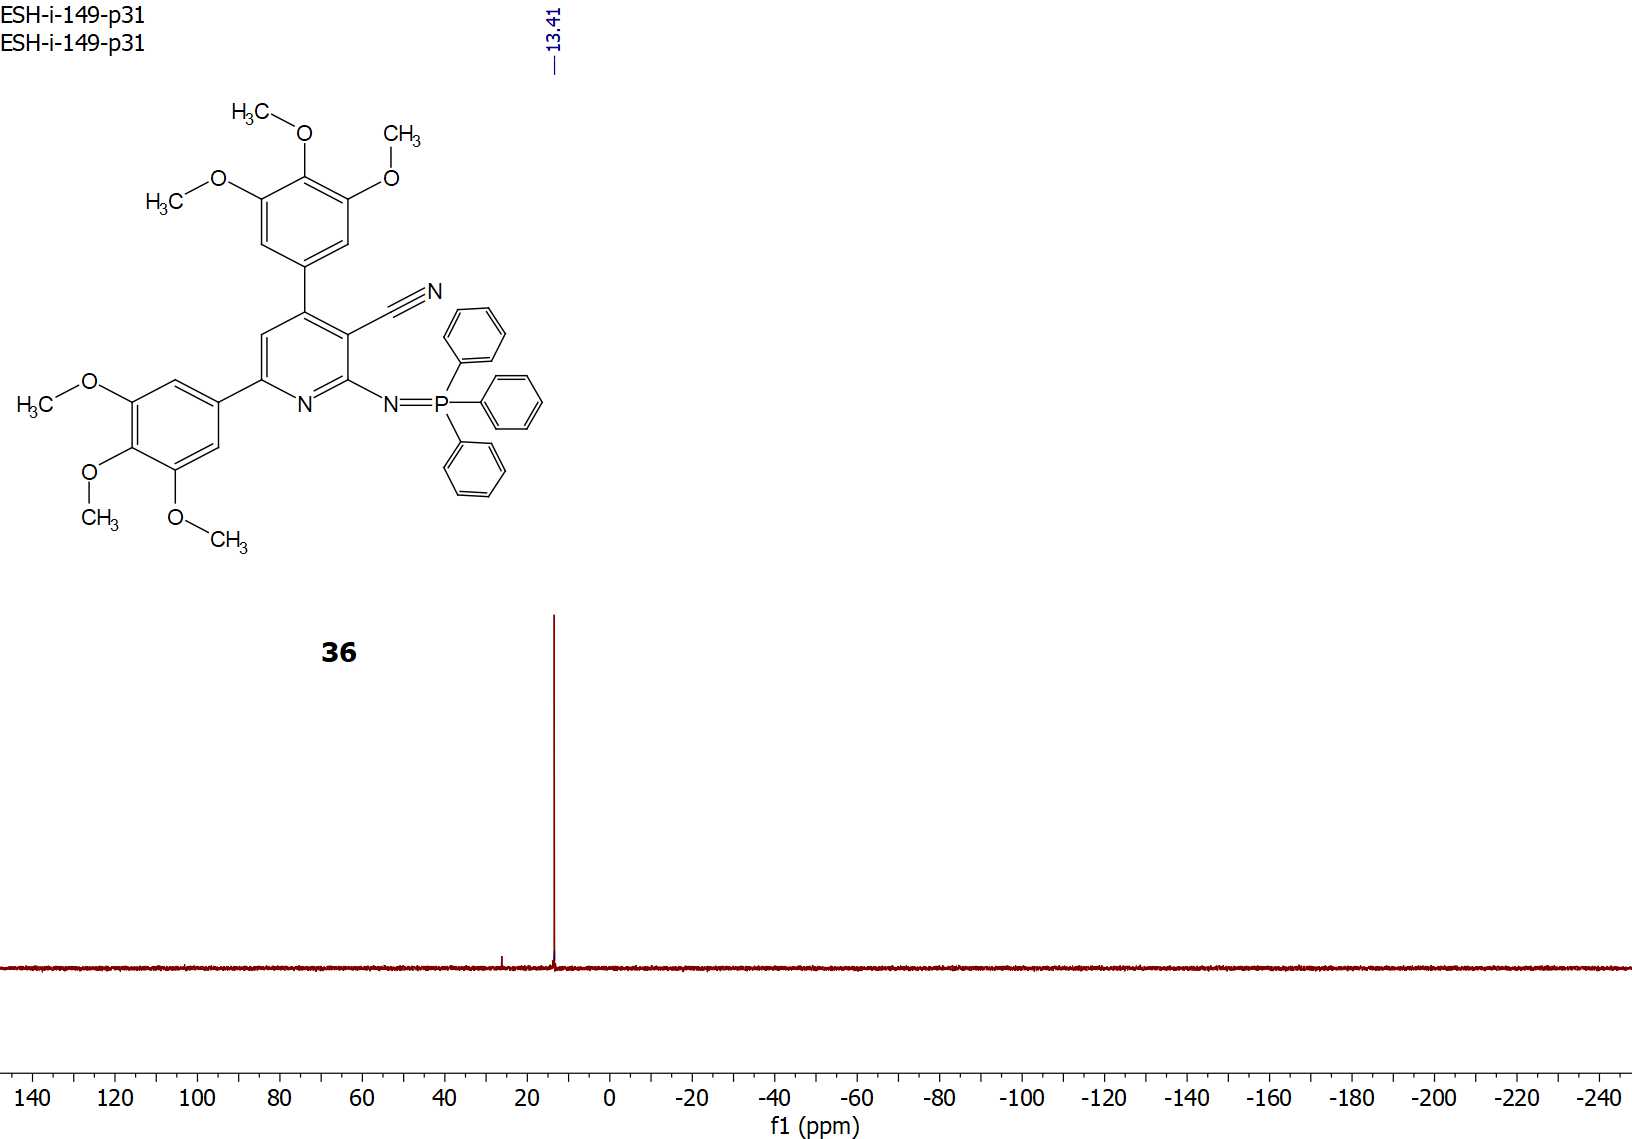


**Figure S57:** 31P-NMR spectrum of compound 36.


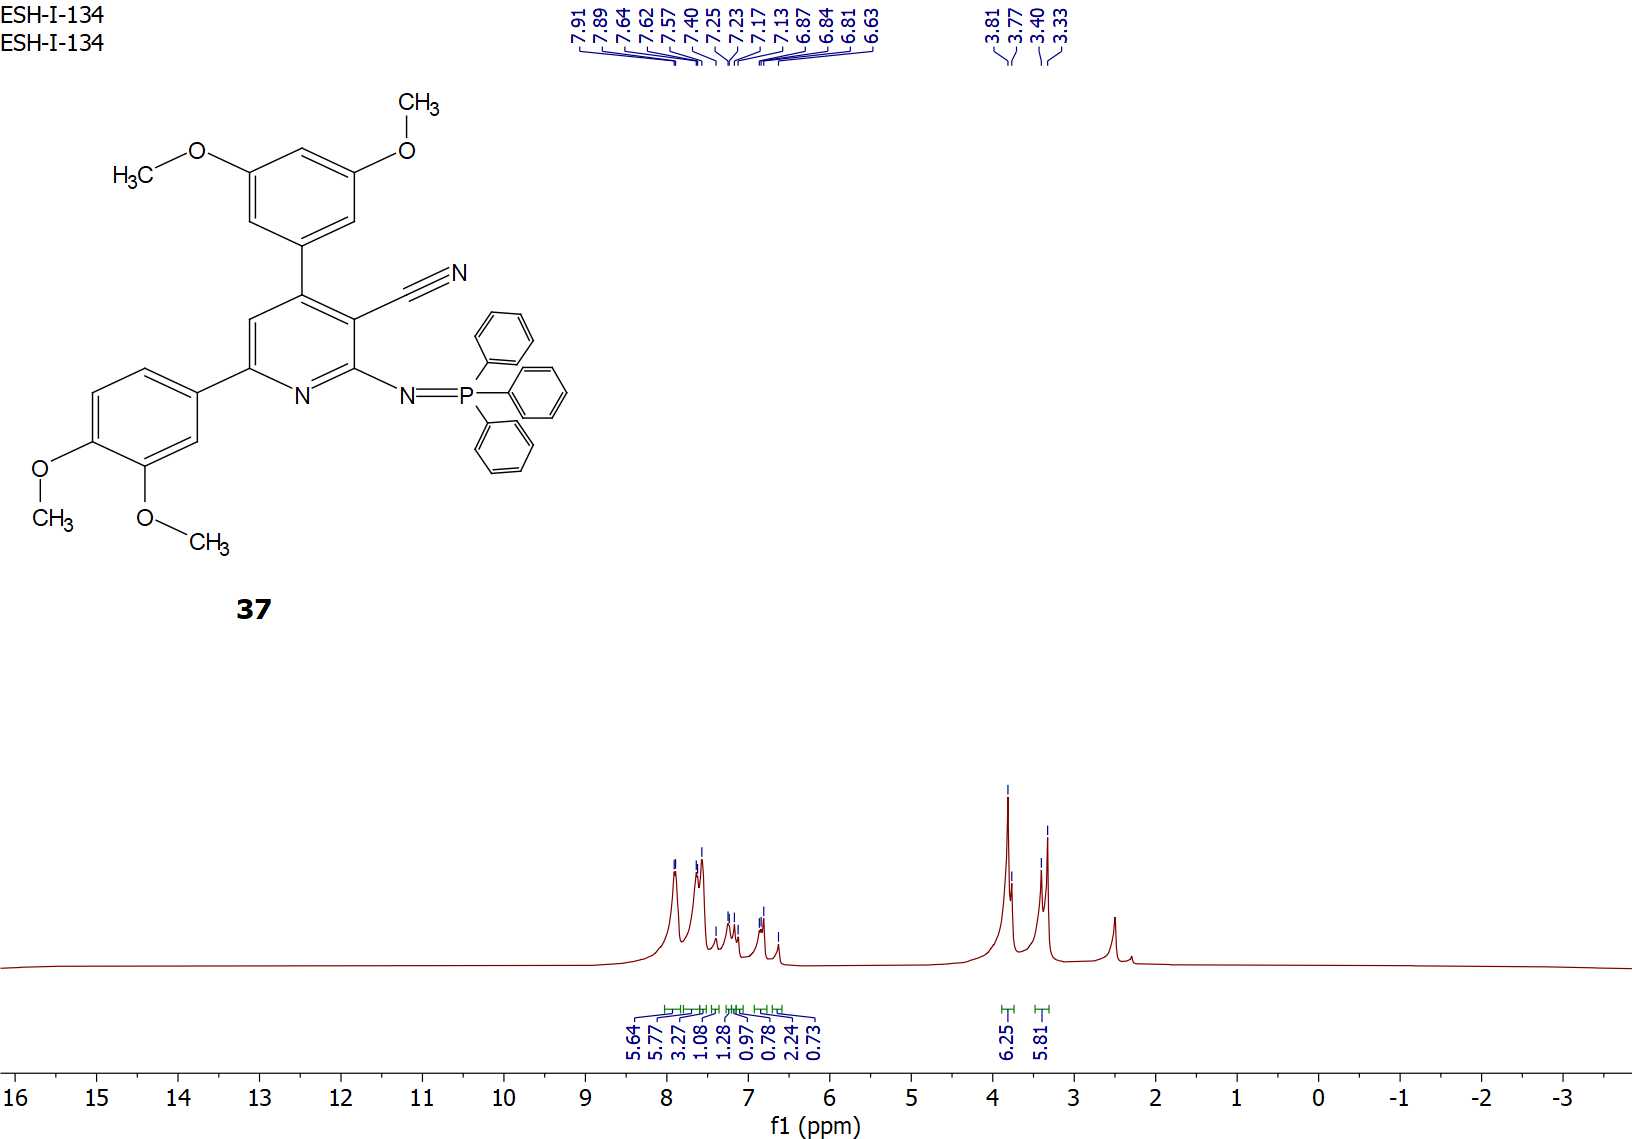


**Figure S58:** 1H-NMR spectrum of compound 37.


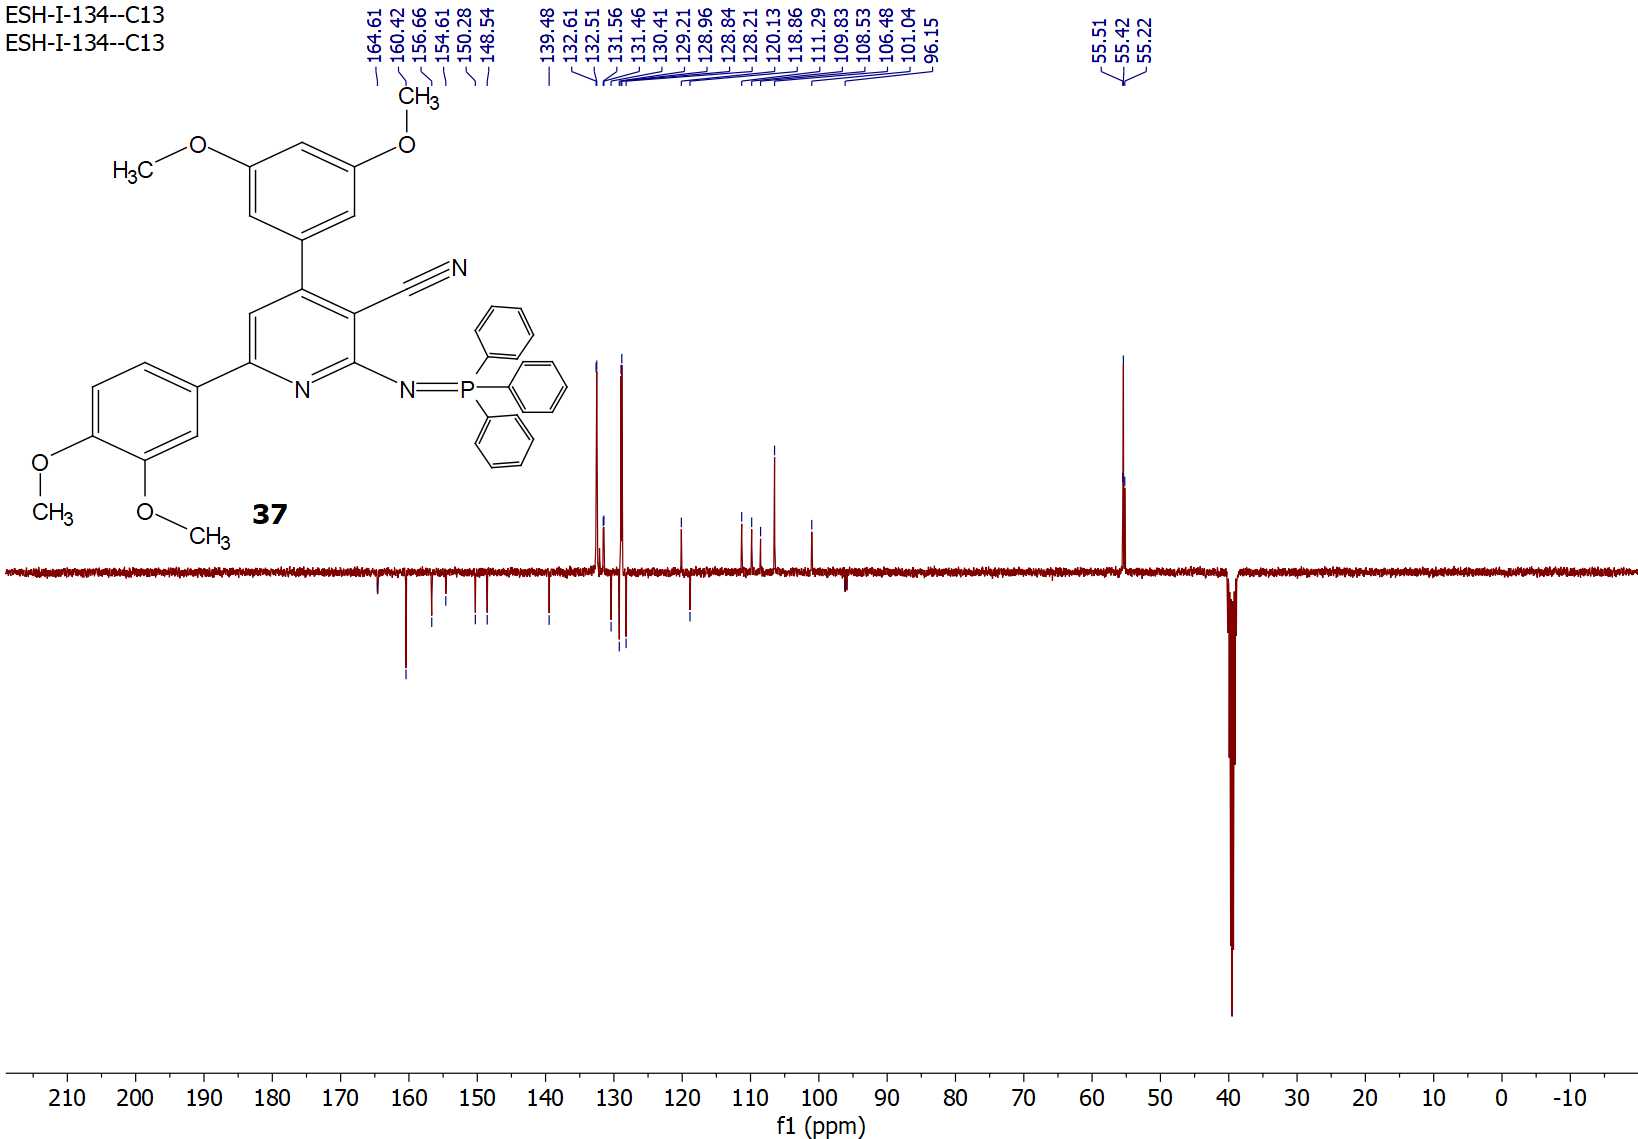


**Figure S59:** 13C-APT NMR spectrum of compound 37.


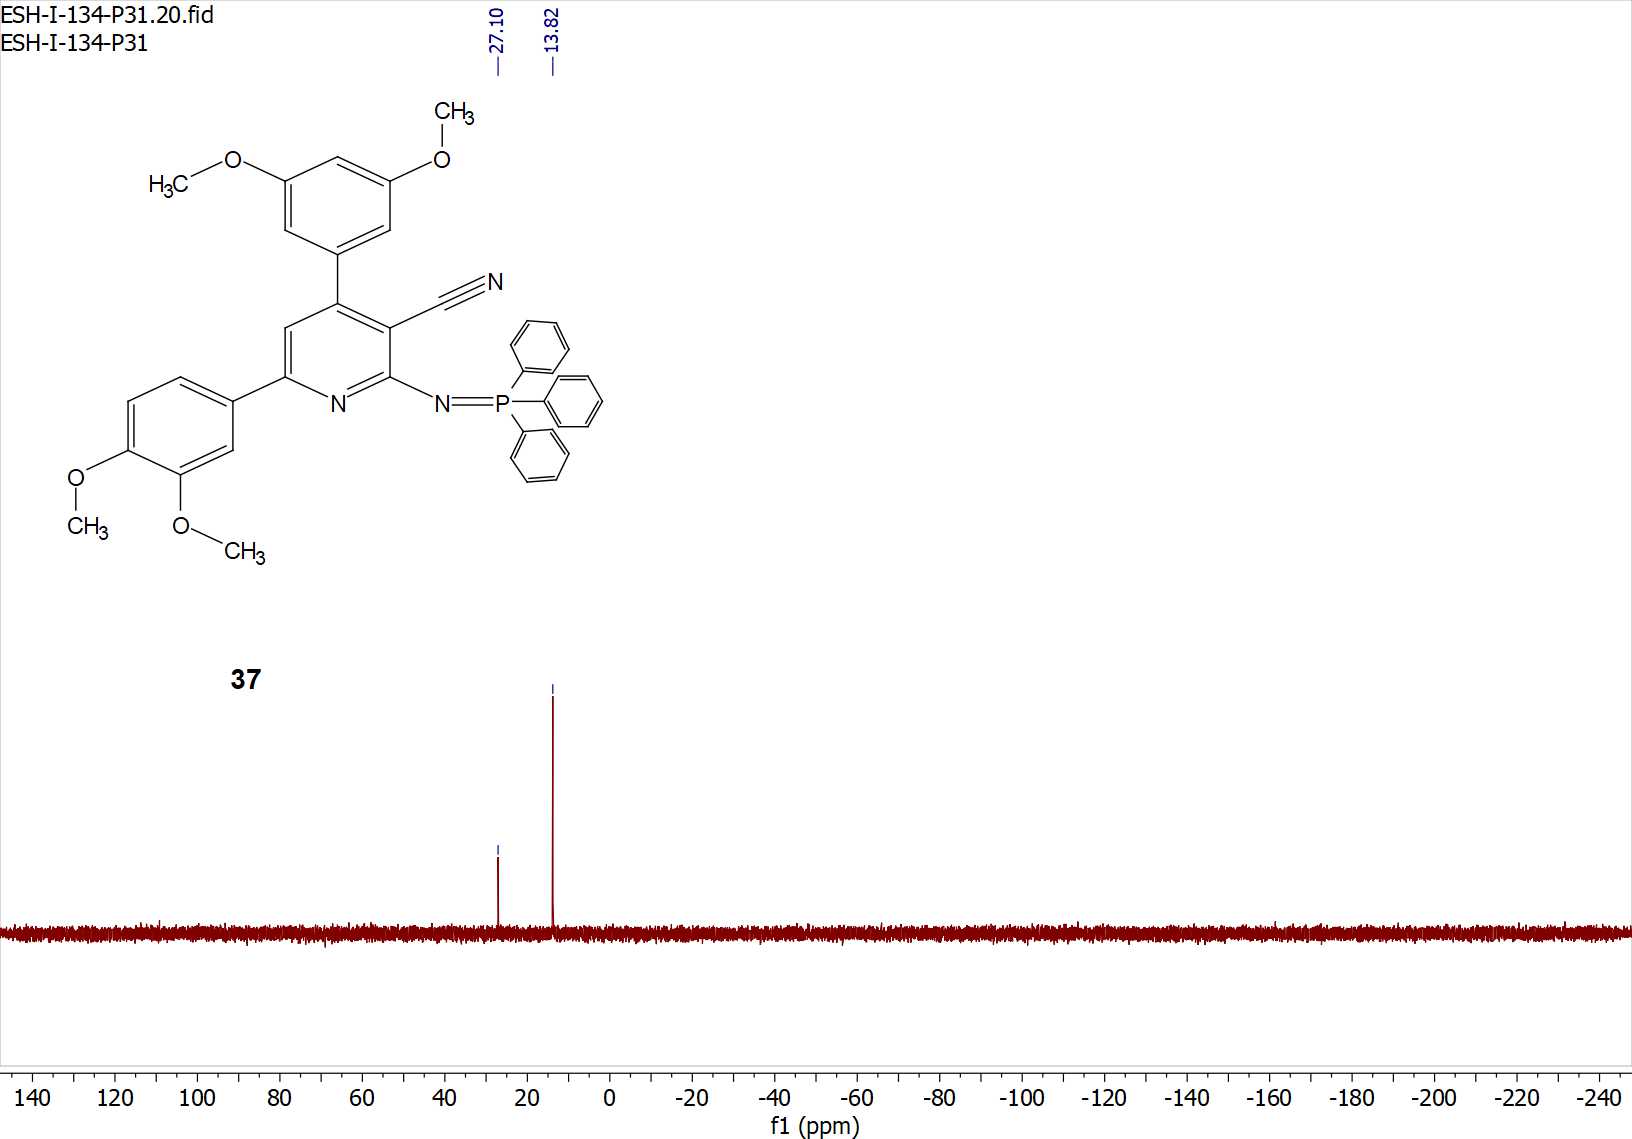


**Figure S60:** 31P-NMR spectrum of compound 37.


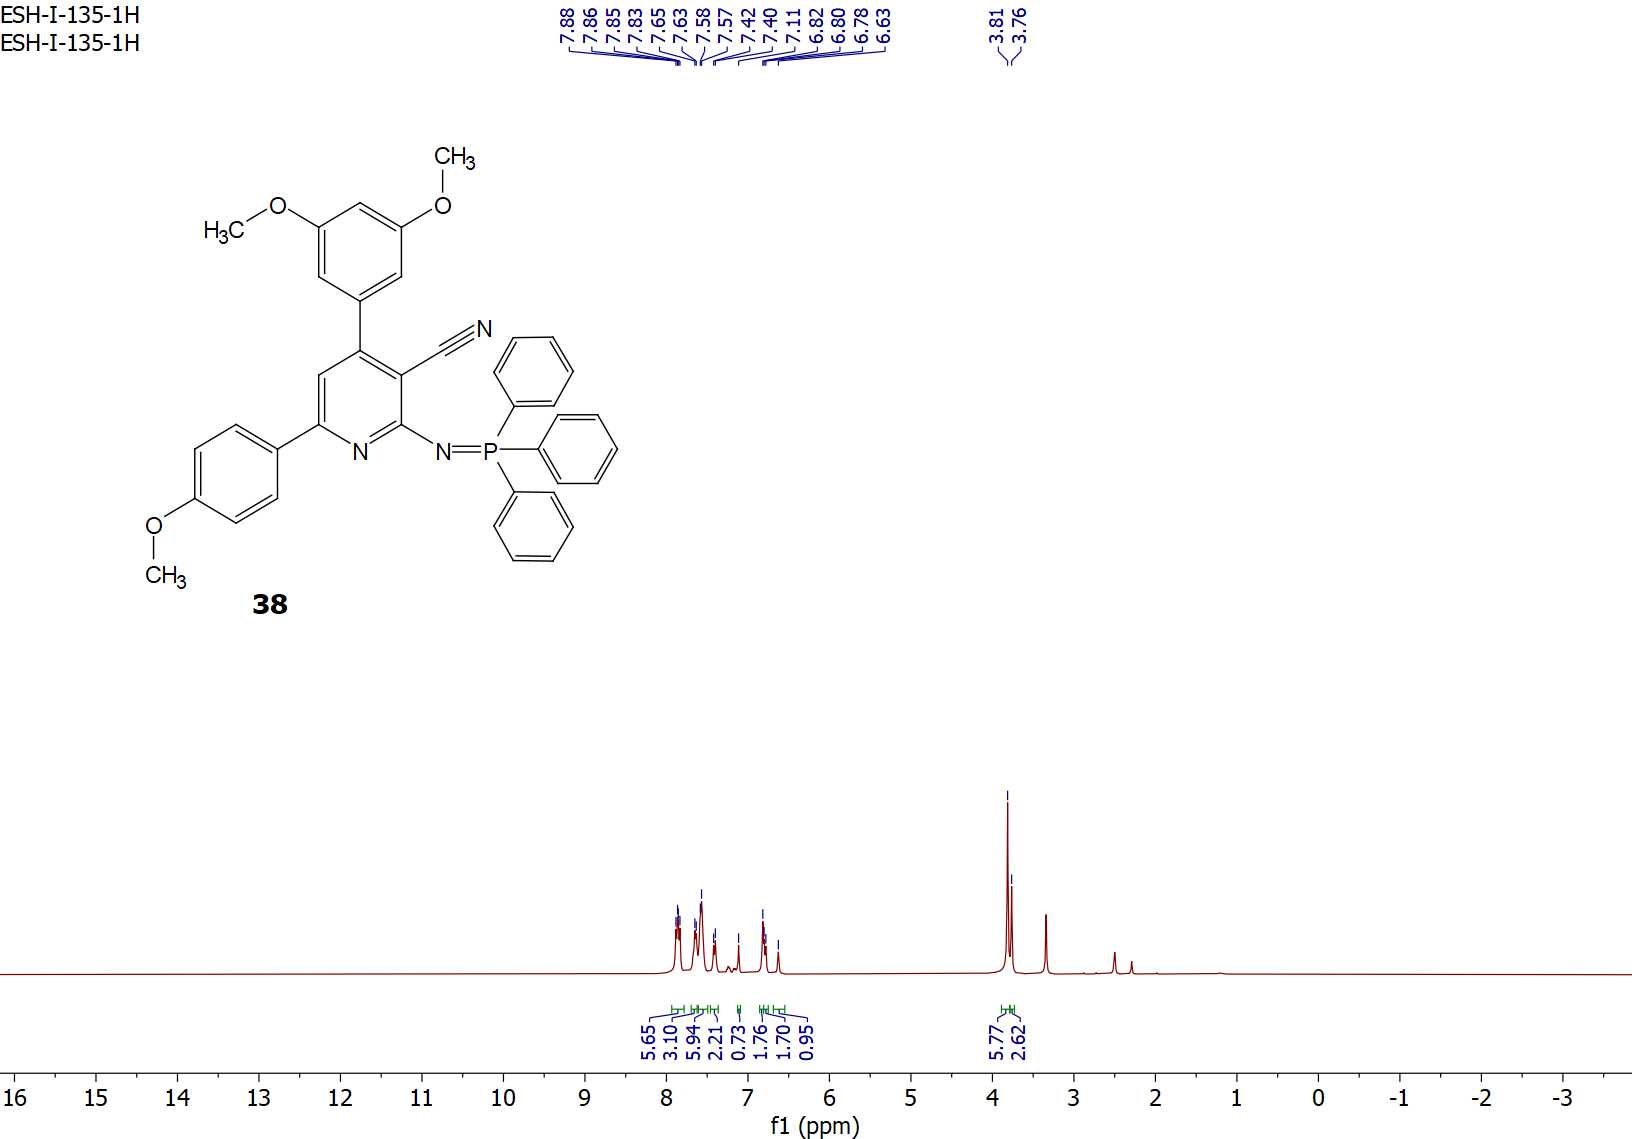


**Figure S61:** 1H-NMR spectrum of compound 38.


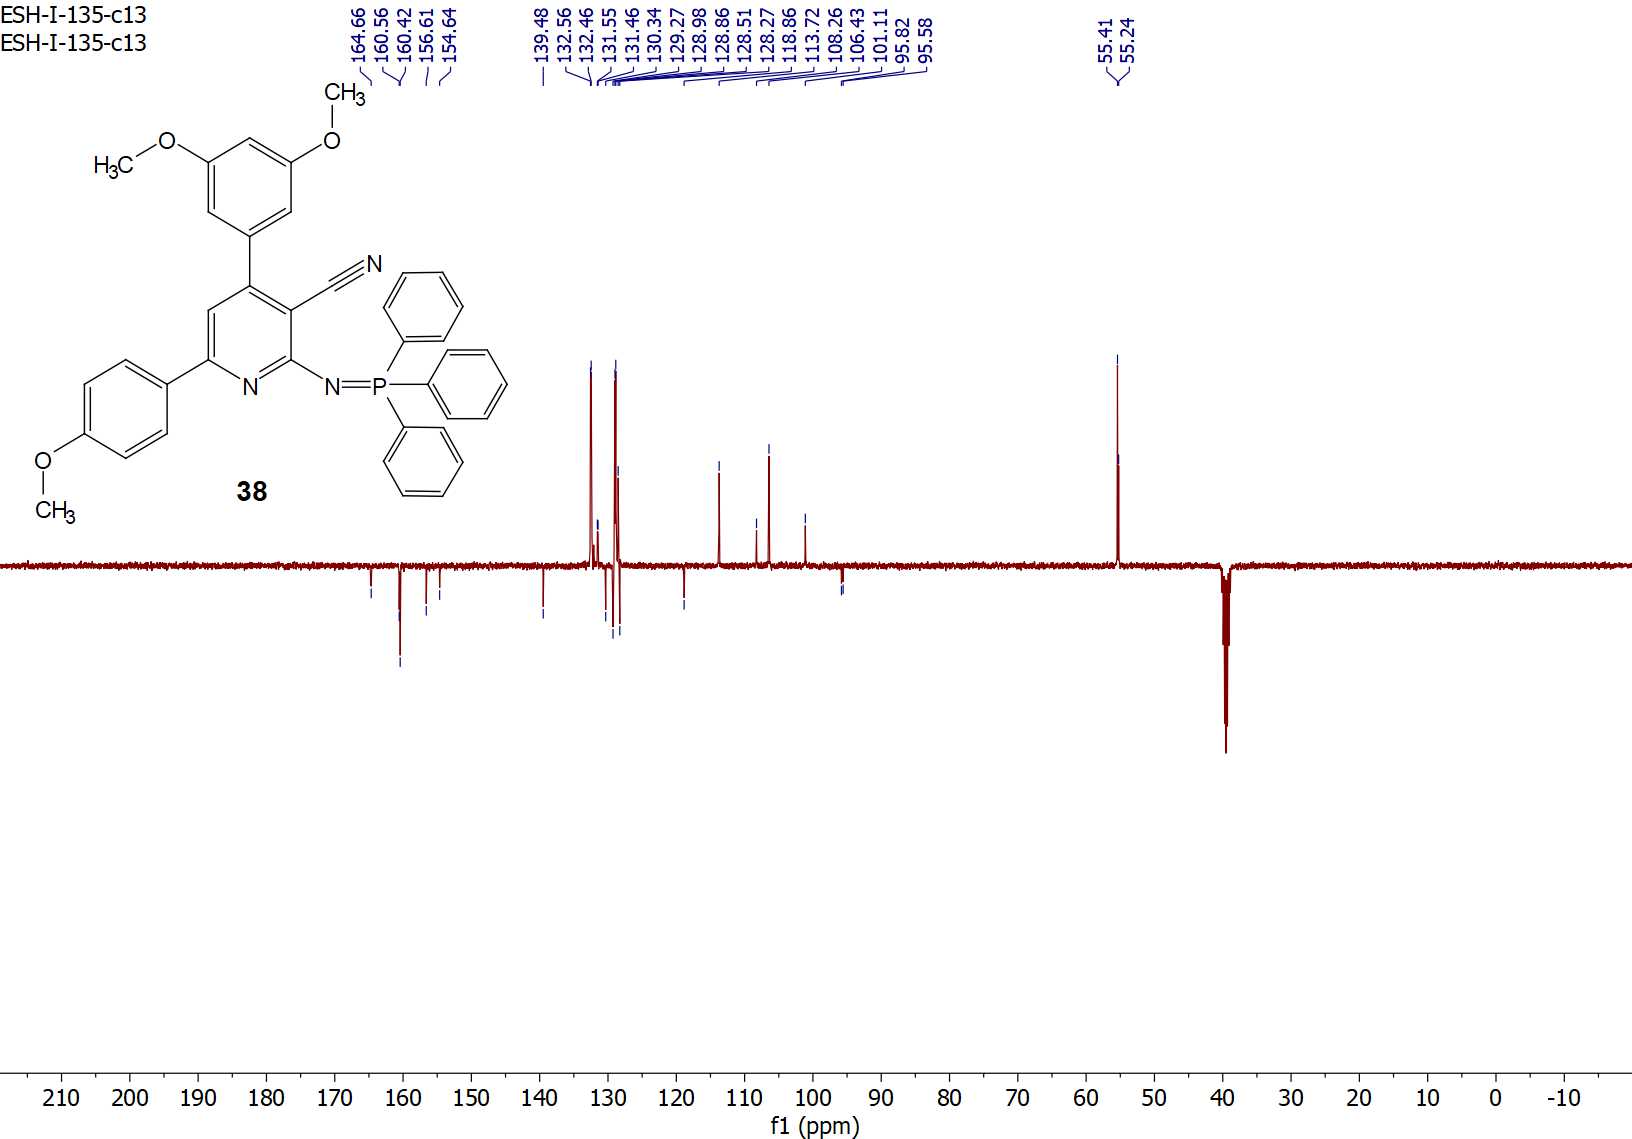


**Figure S62:** 13C-APT NMR spectrum of compound 38.


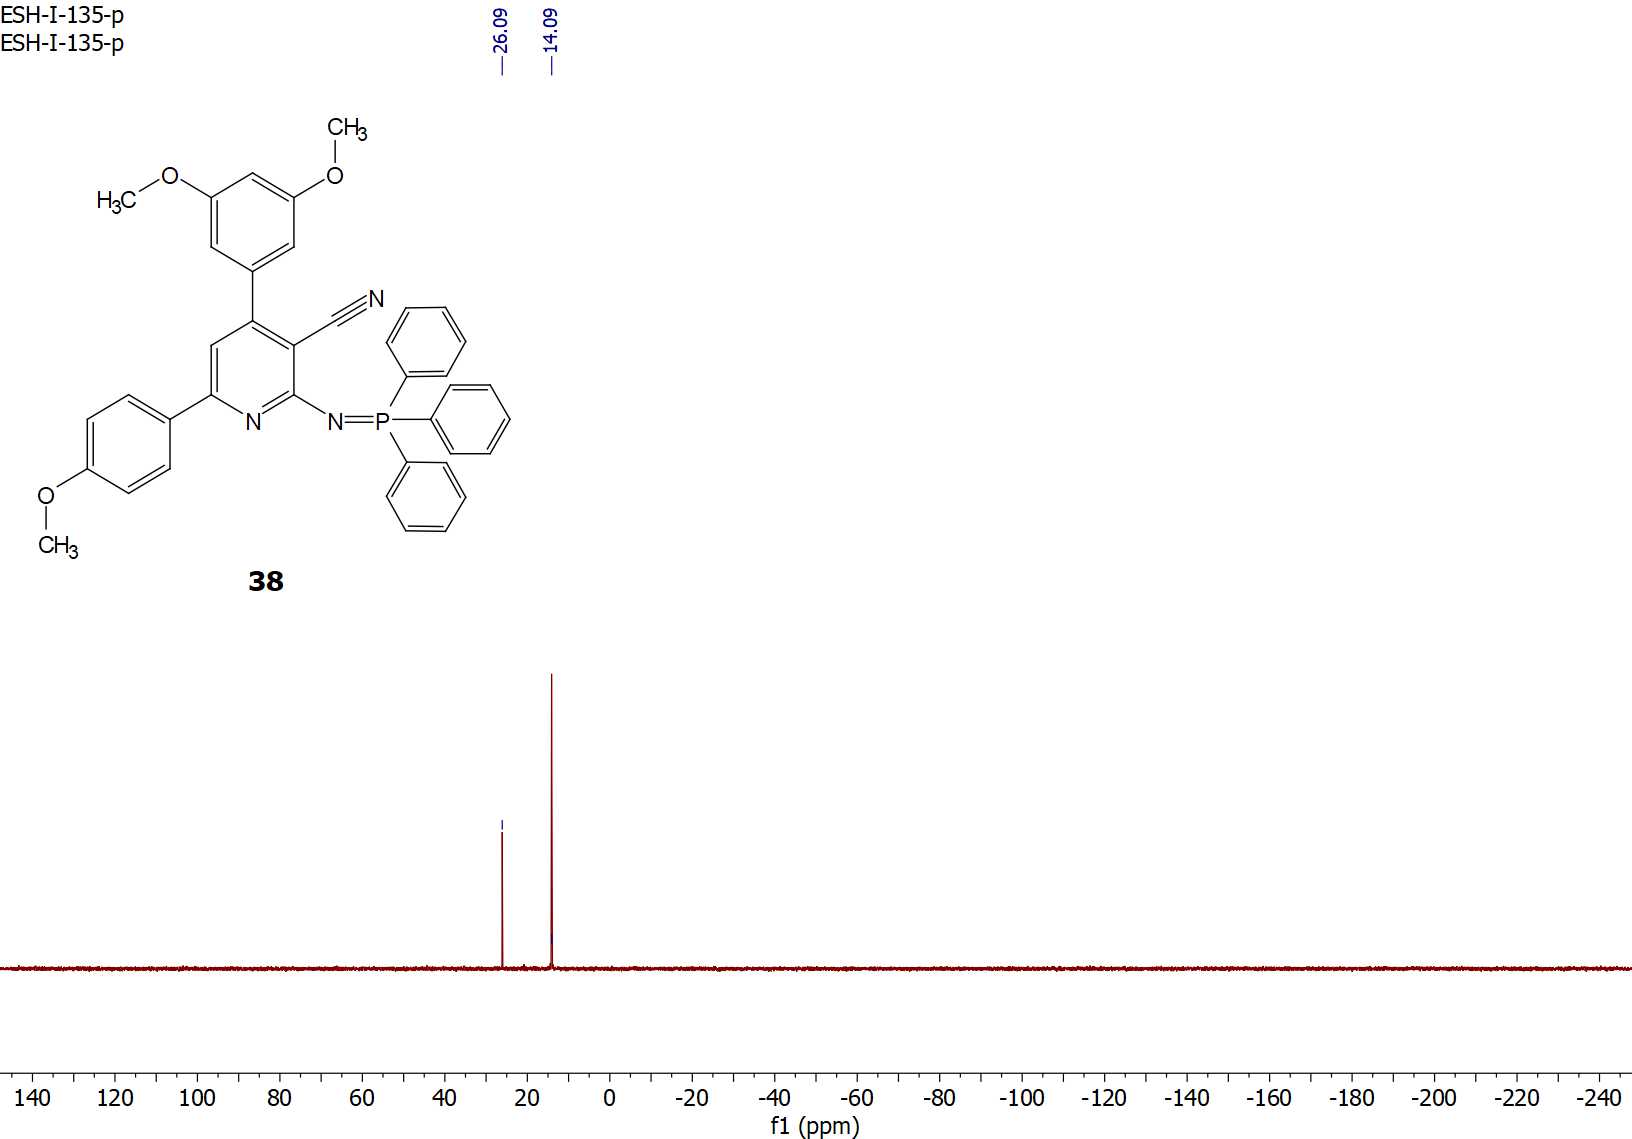


**Figure S63:** 31P-NMR spectrum of compound 38.


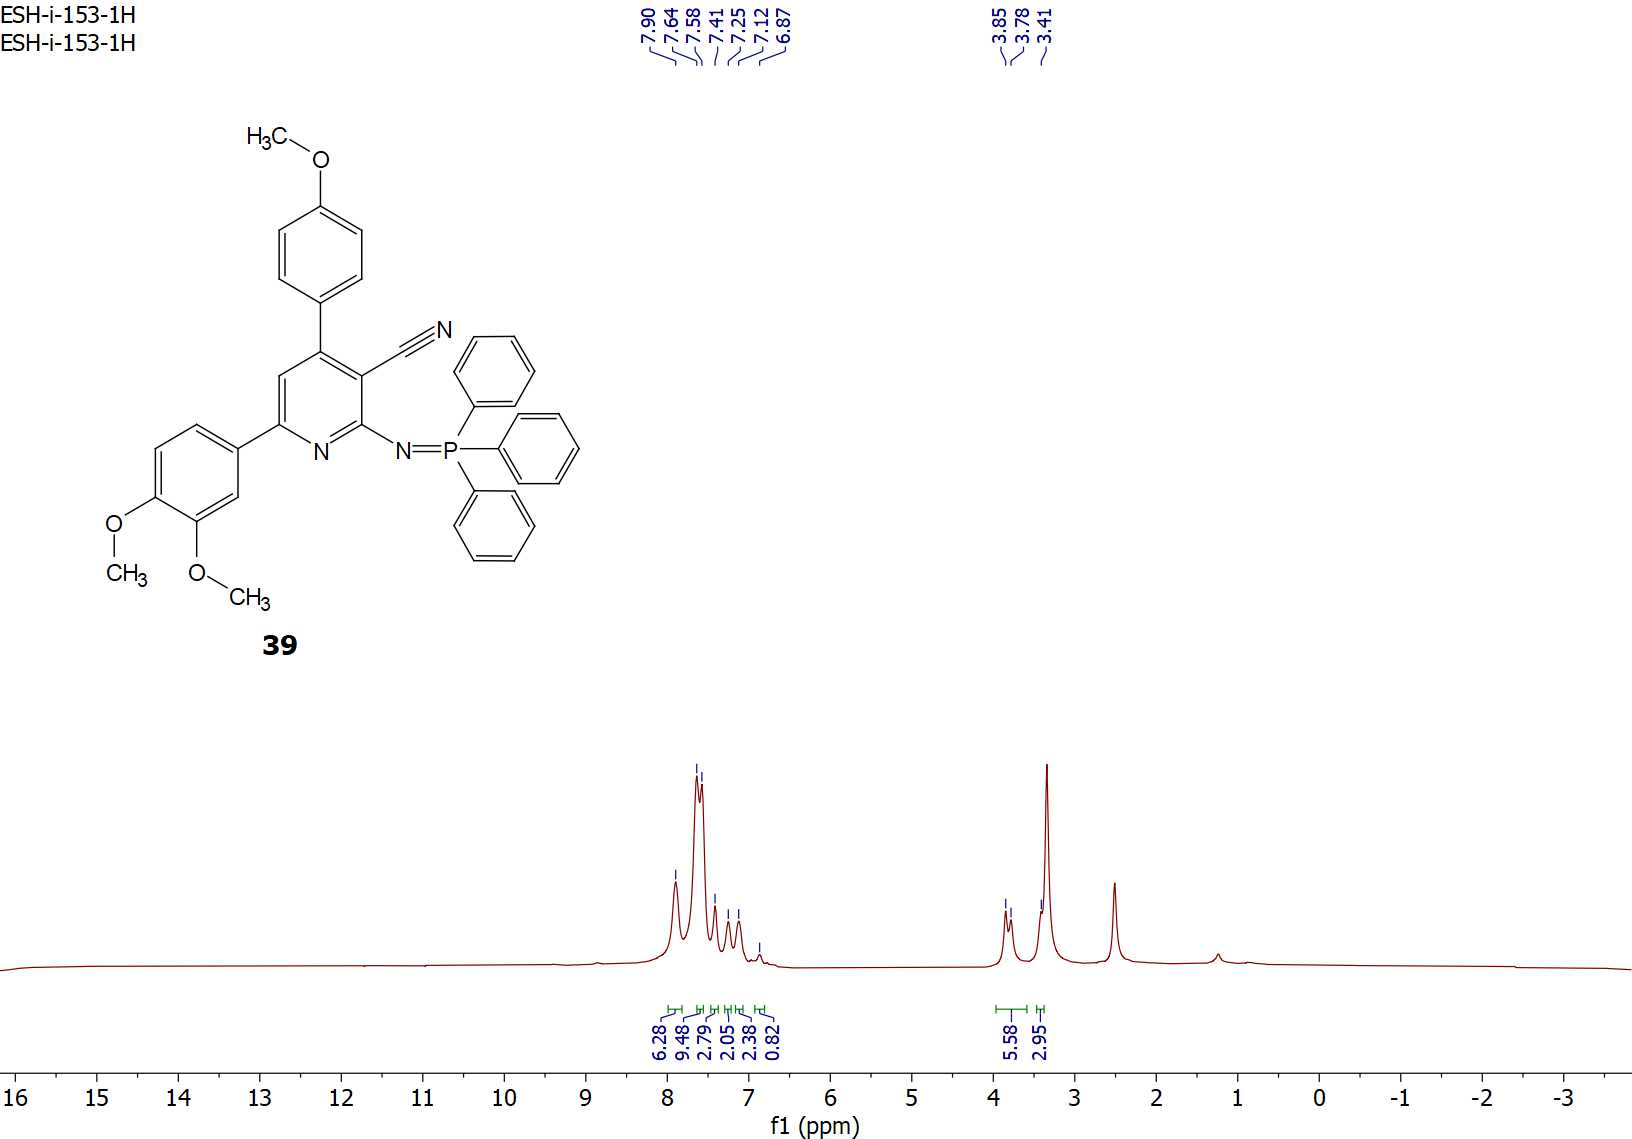


**Figure S64:** 1H-NMR spectrum of compound 39.


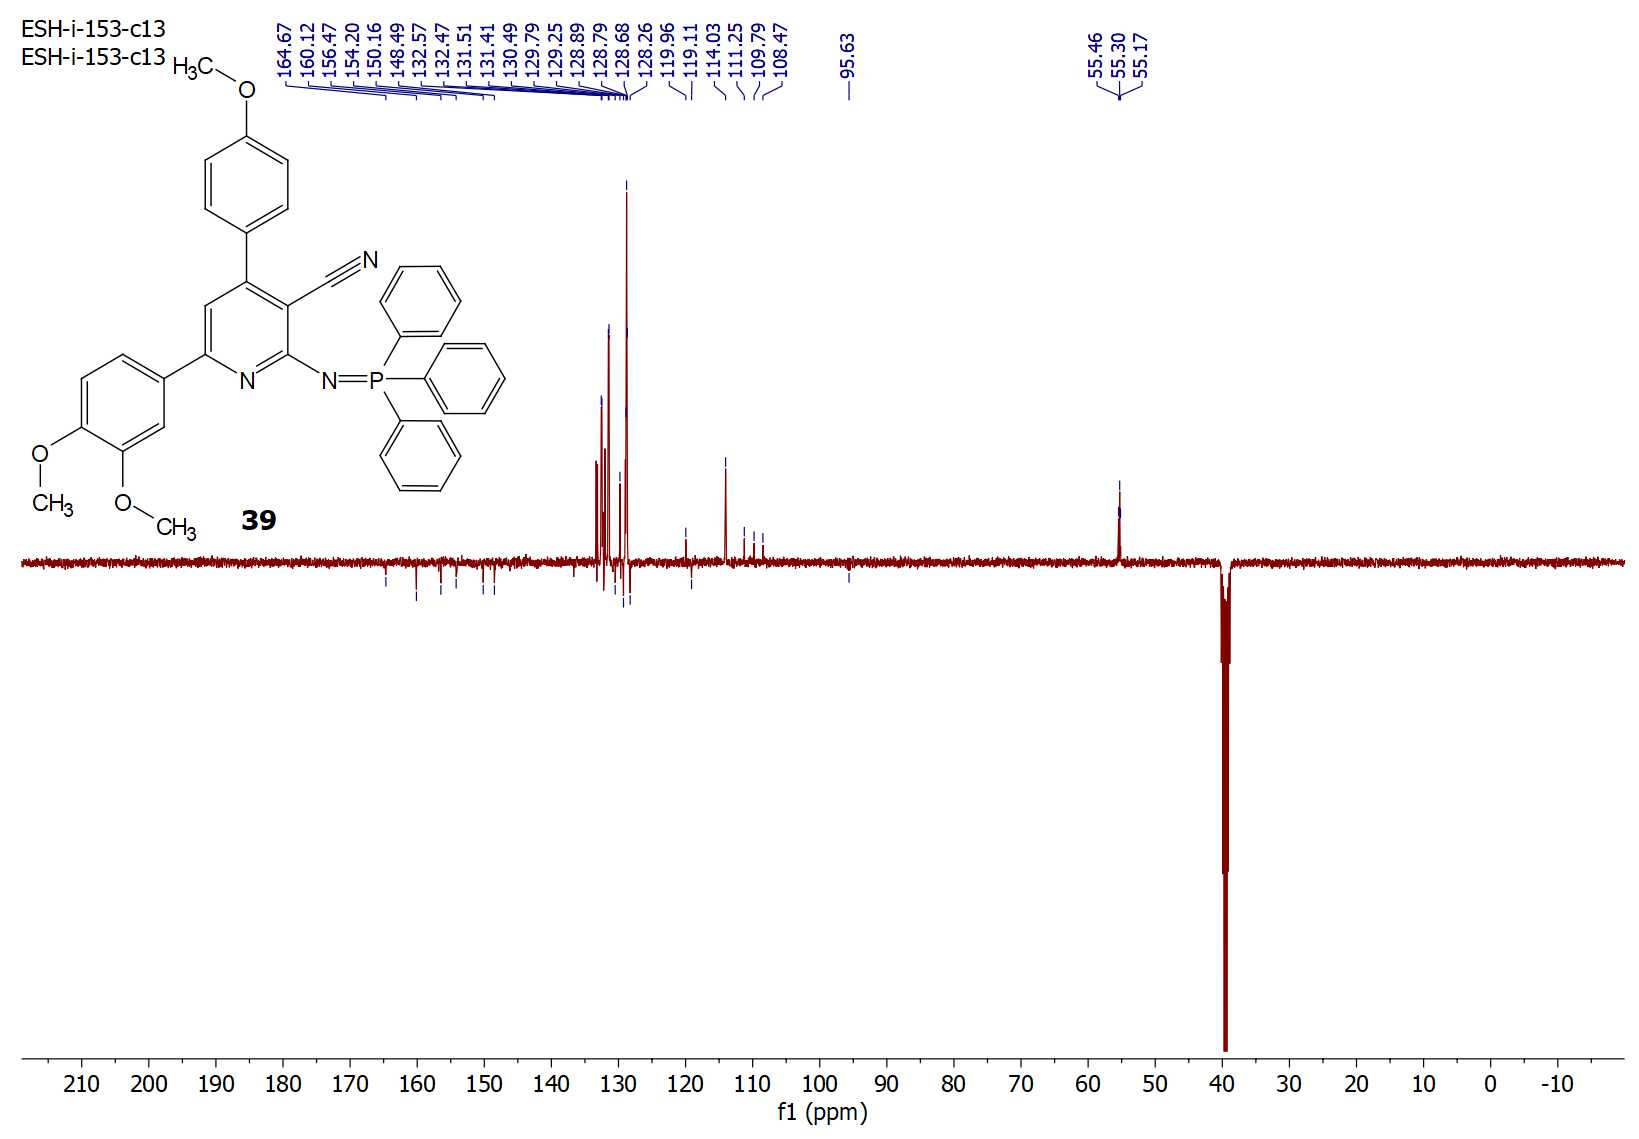


**Figure S65:** 13C-APT NMR spectrum of compound 39.


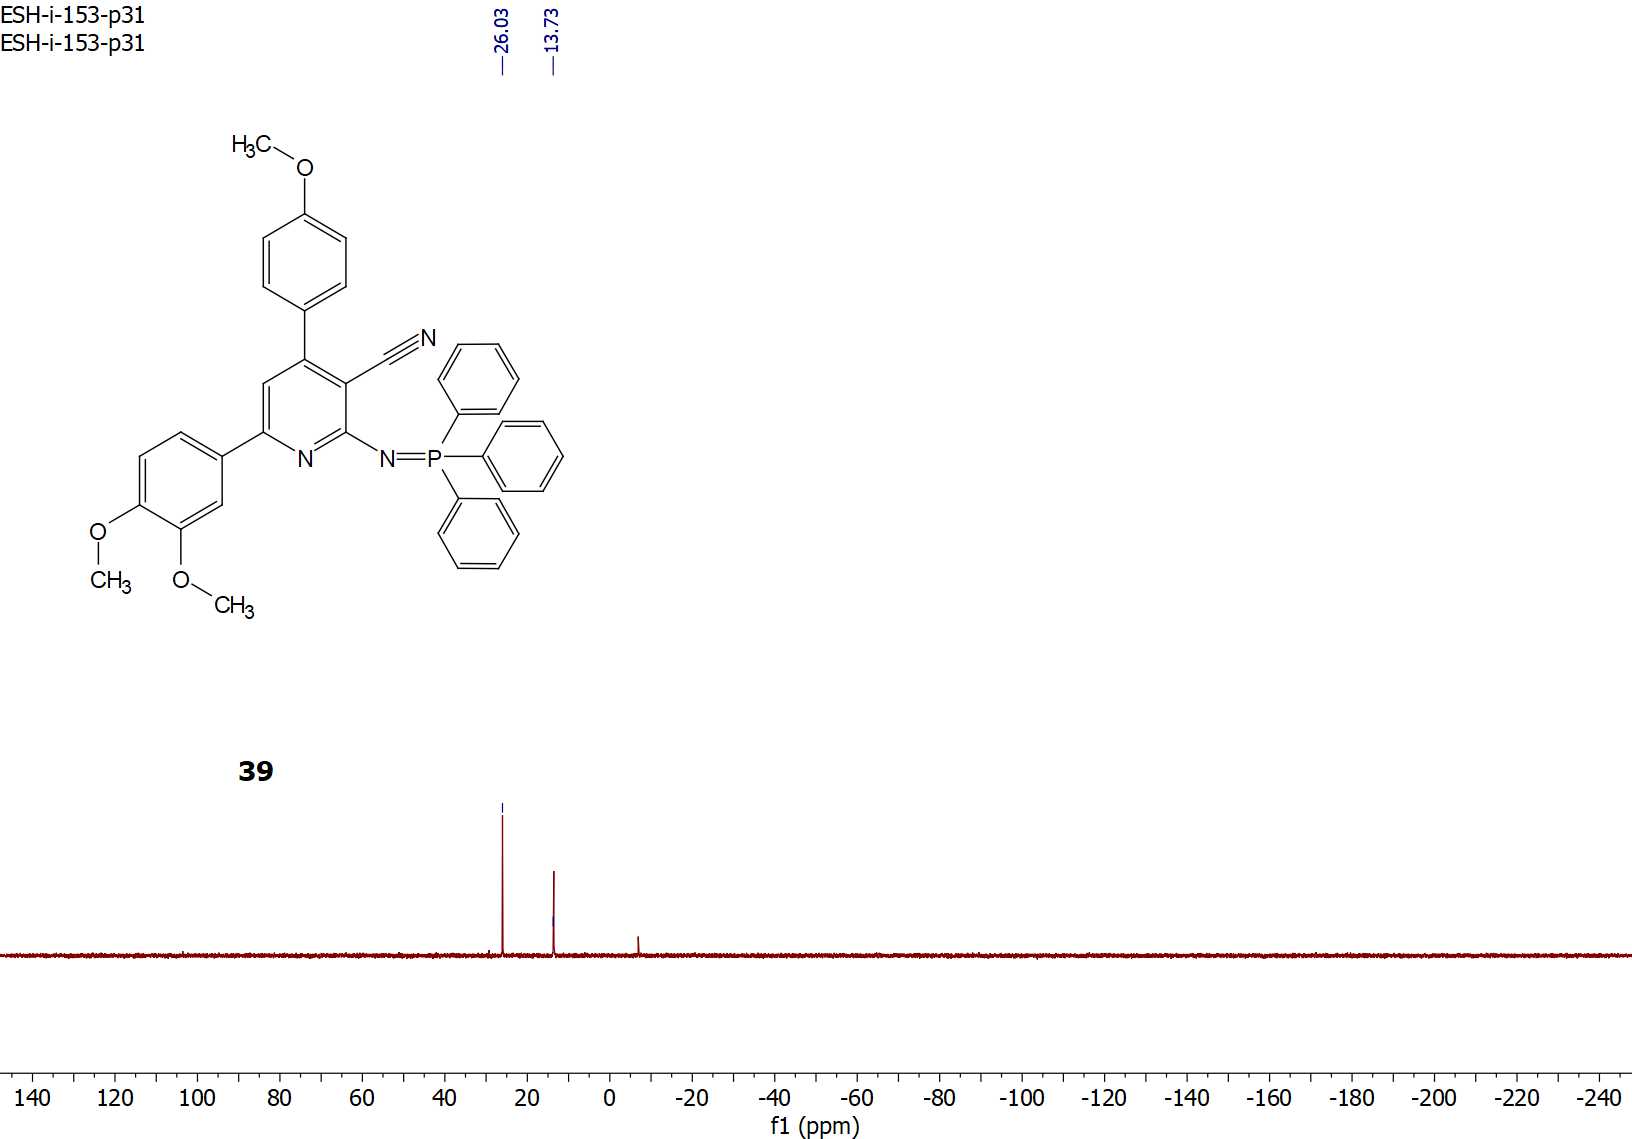


**Figure S66:** 31P-NMR spectrum of compound 39.


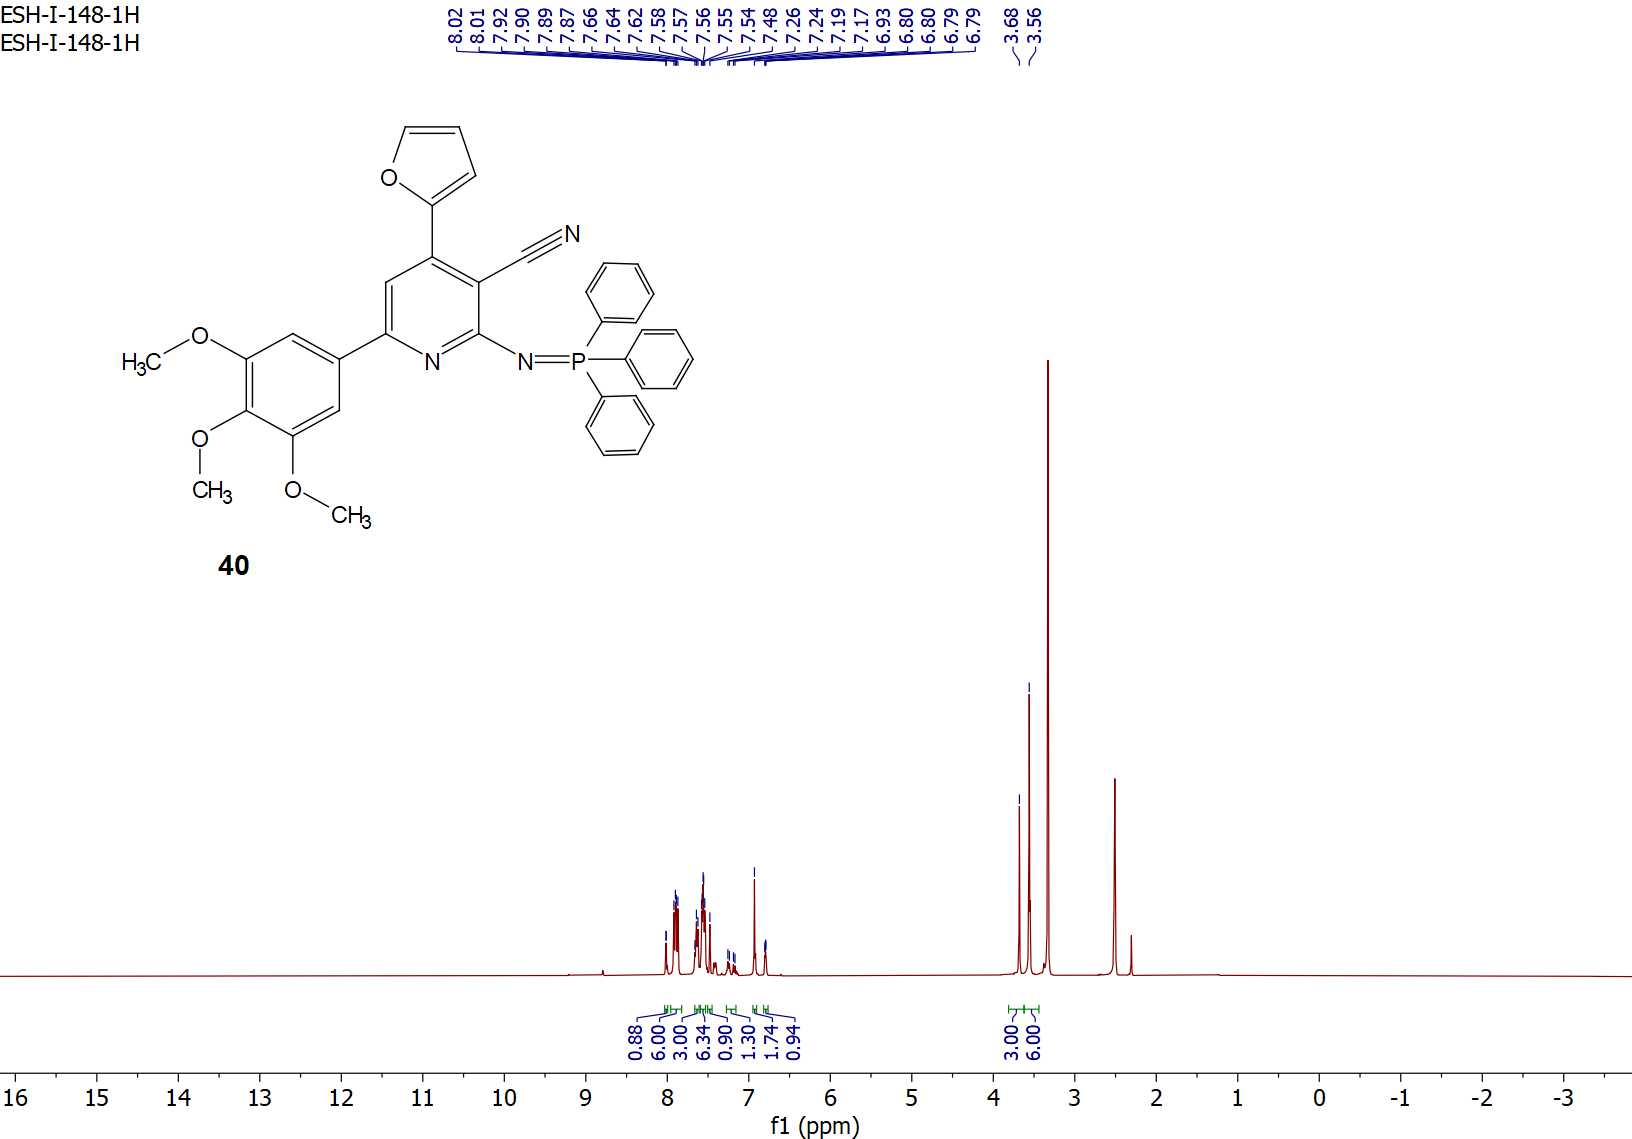


**Figure S67:** 1H-NMR spectrum of compound 40.


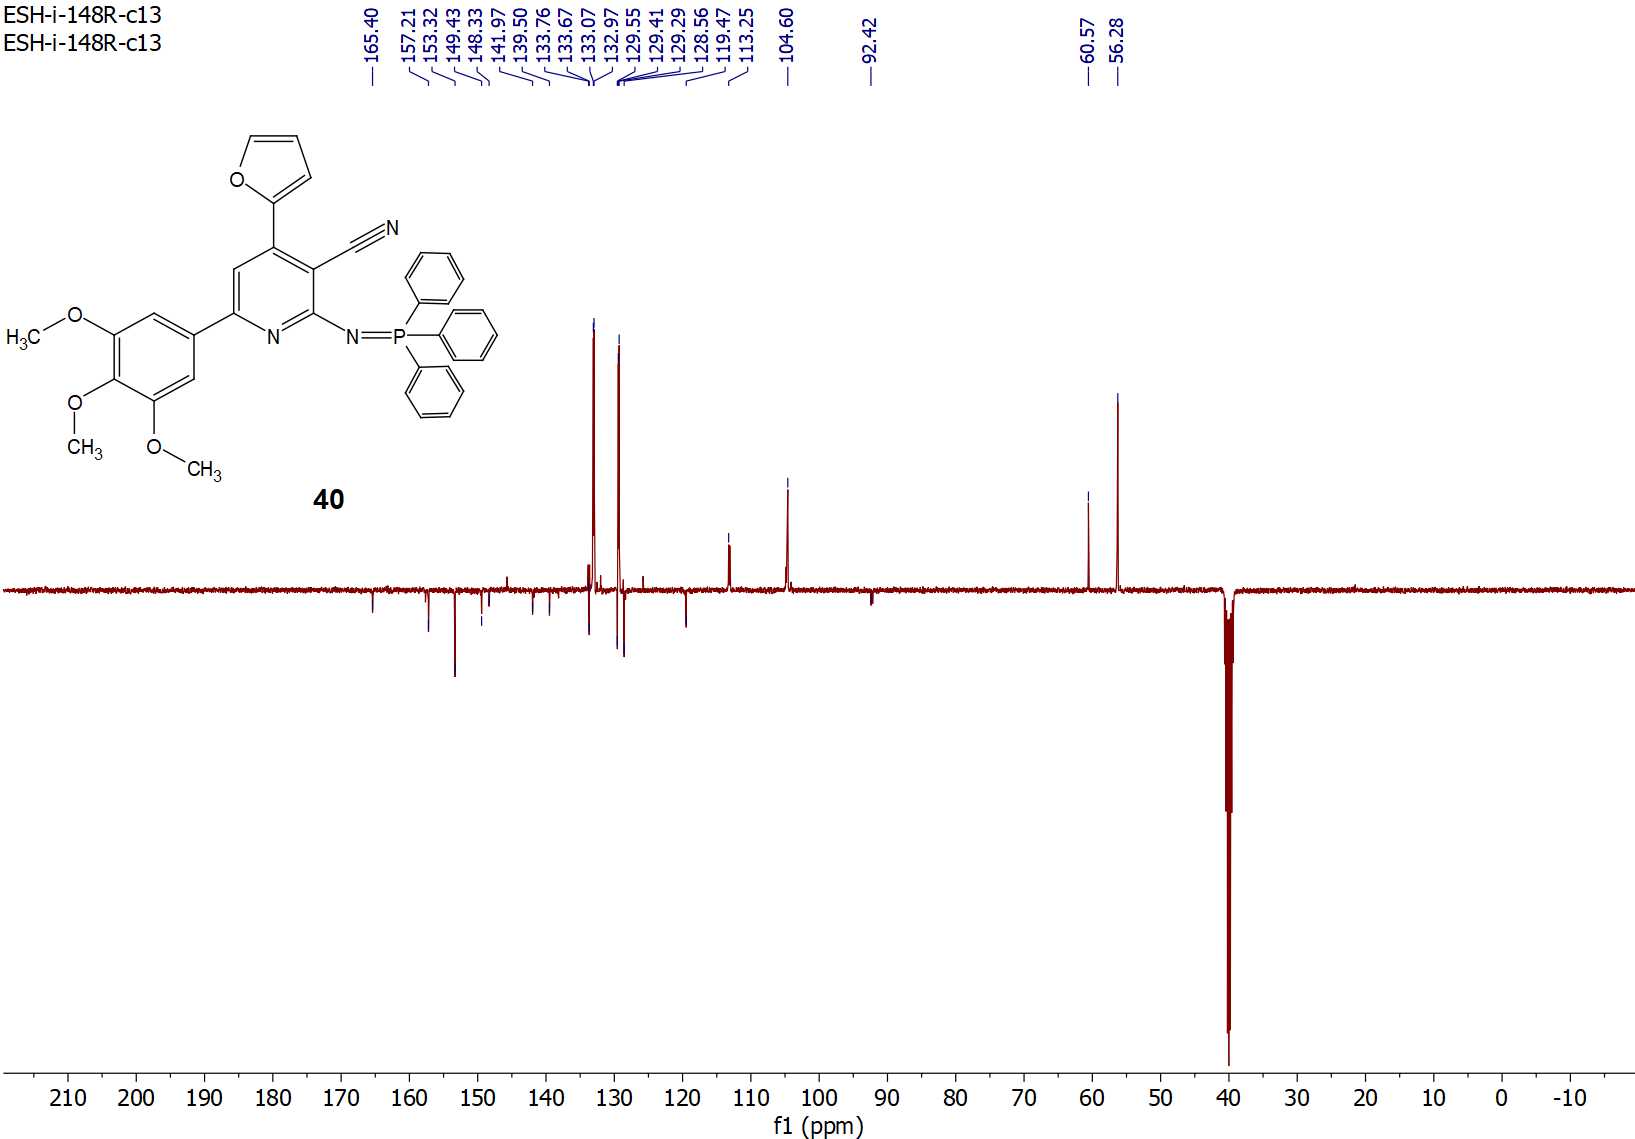


**Figure S68:** 13C-APT NMR spectrum of compound 40.


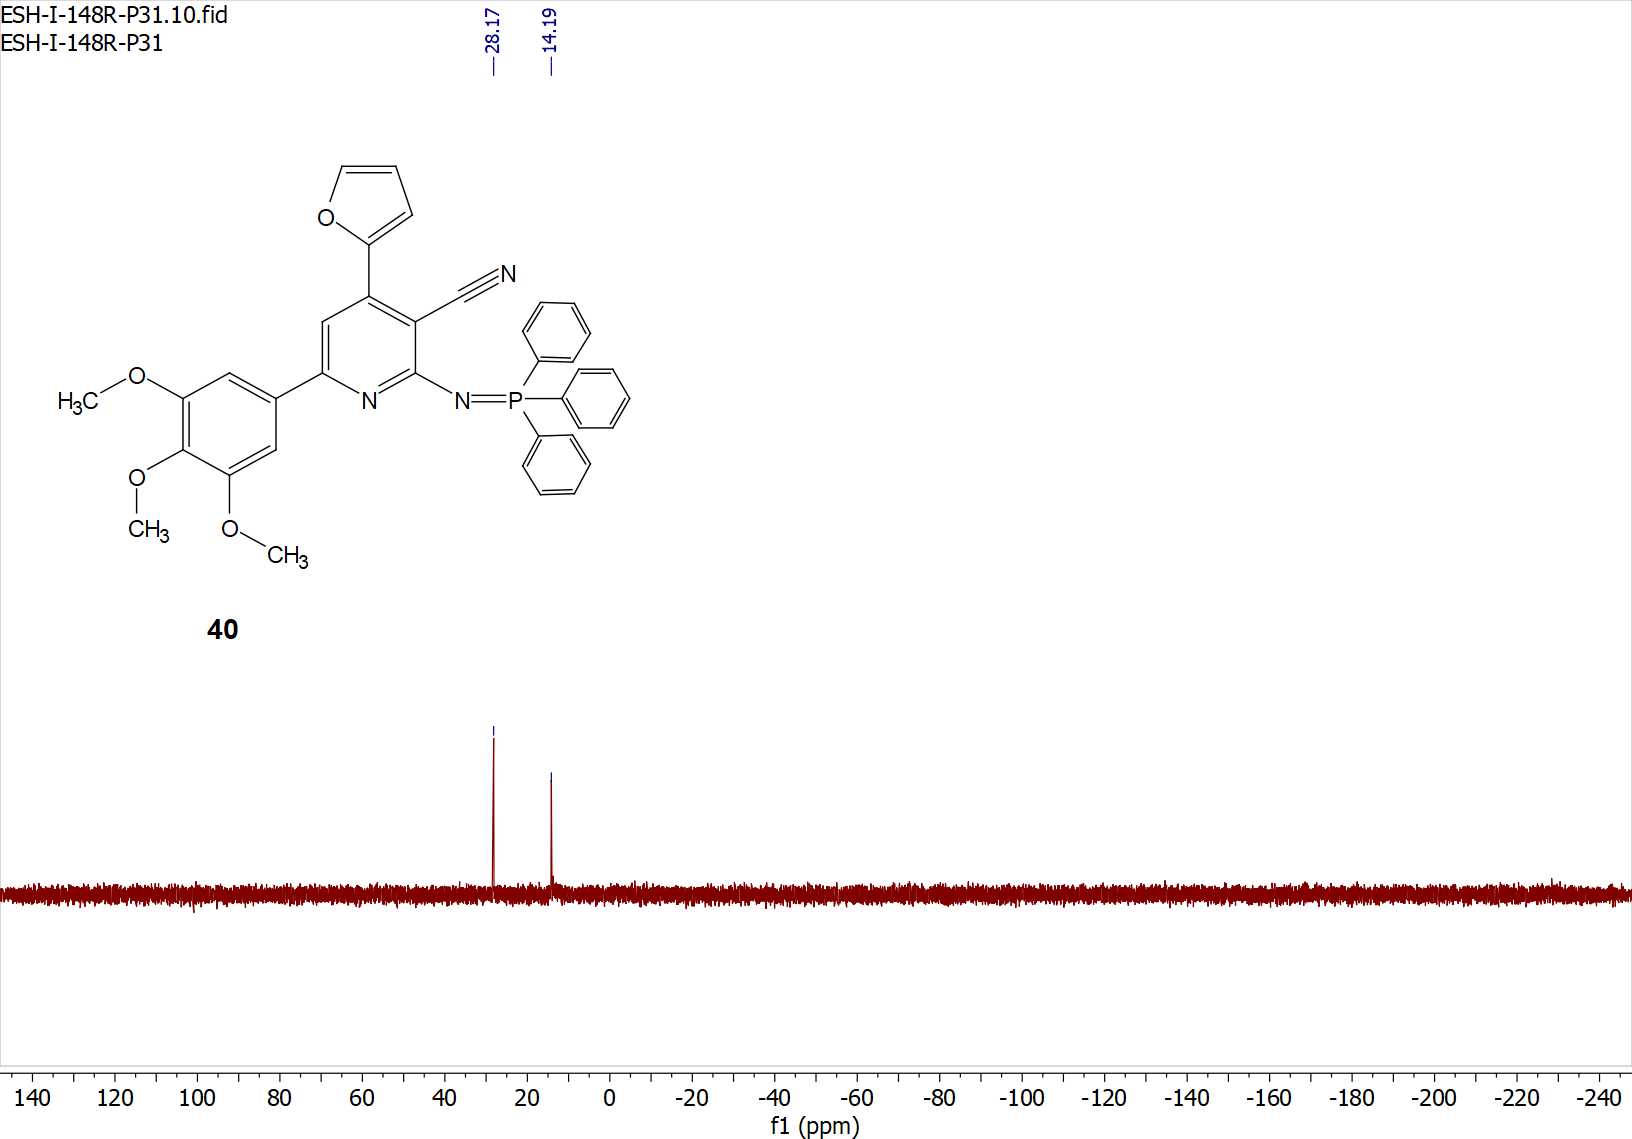


**Figure S69:** 31P-NMR spectrum of compound 40.


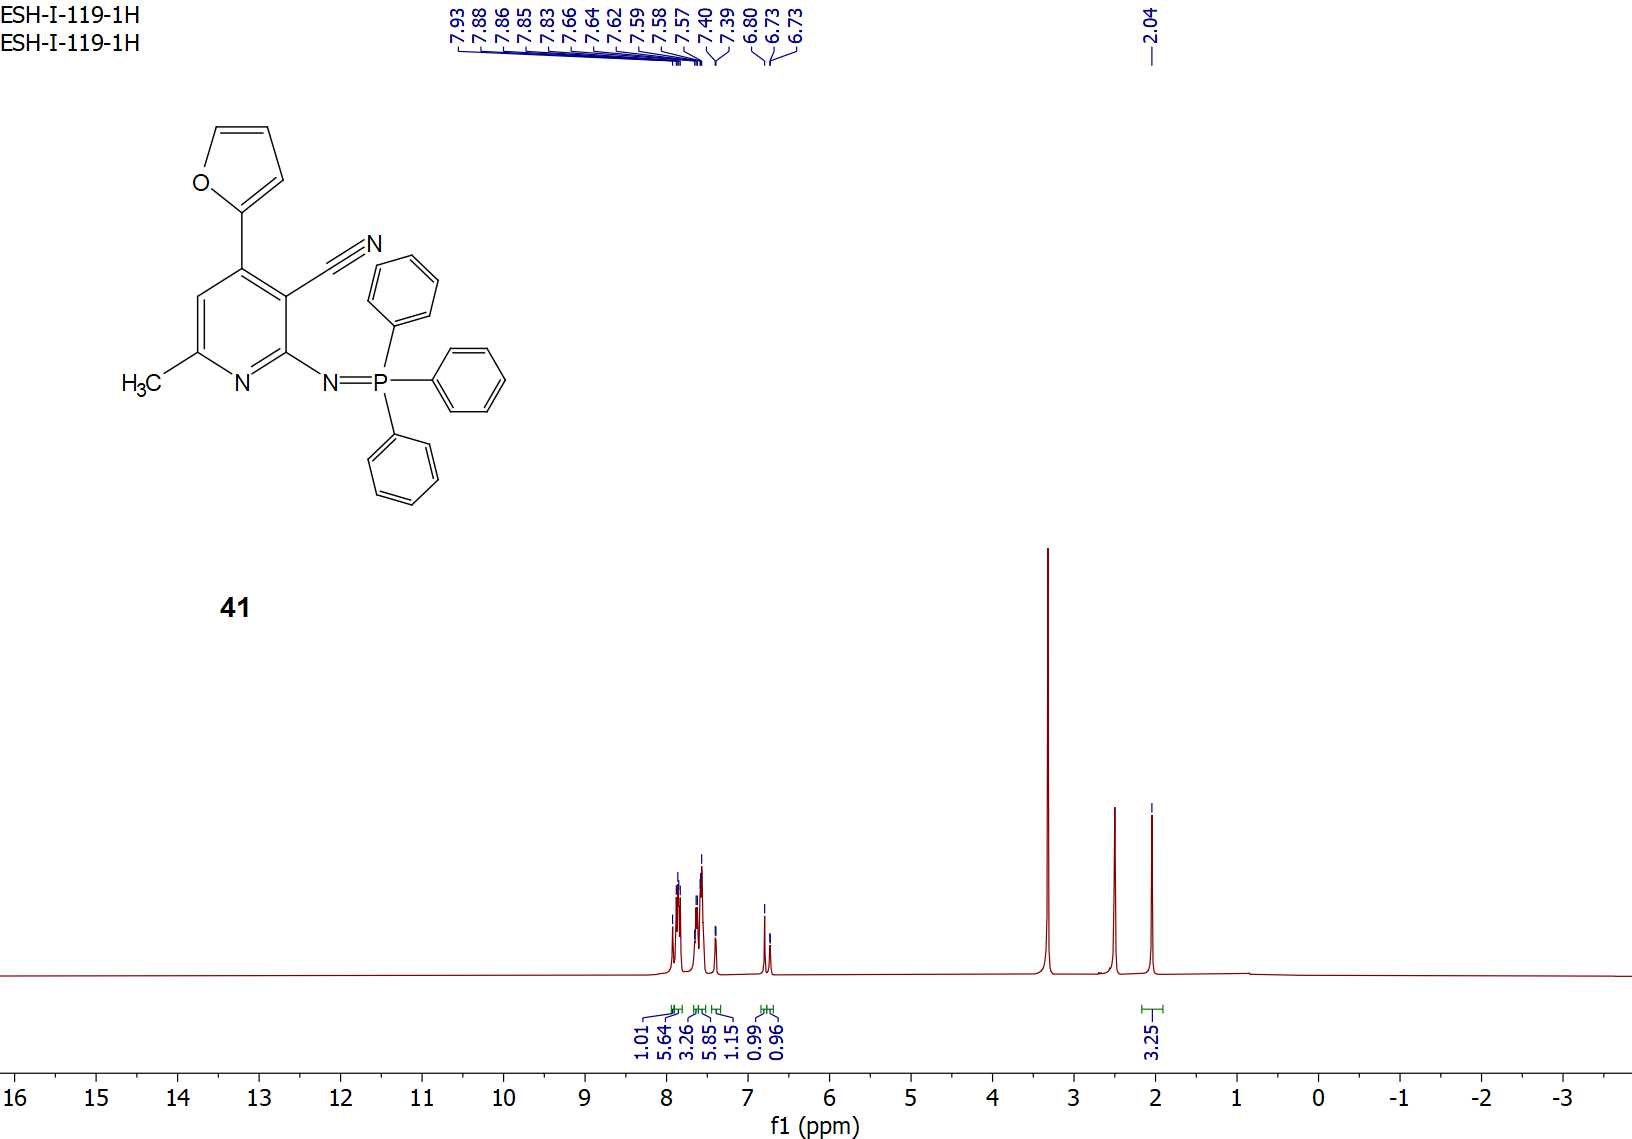


**Figure S70:** 1H-NMR spectrum of compound 41.


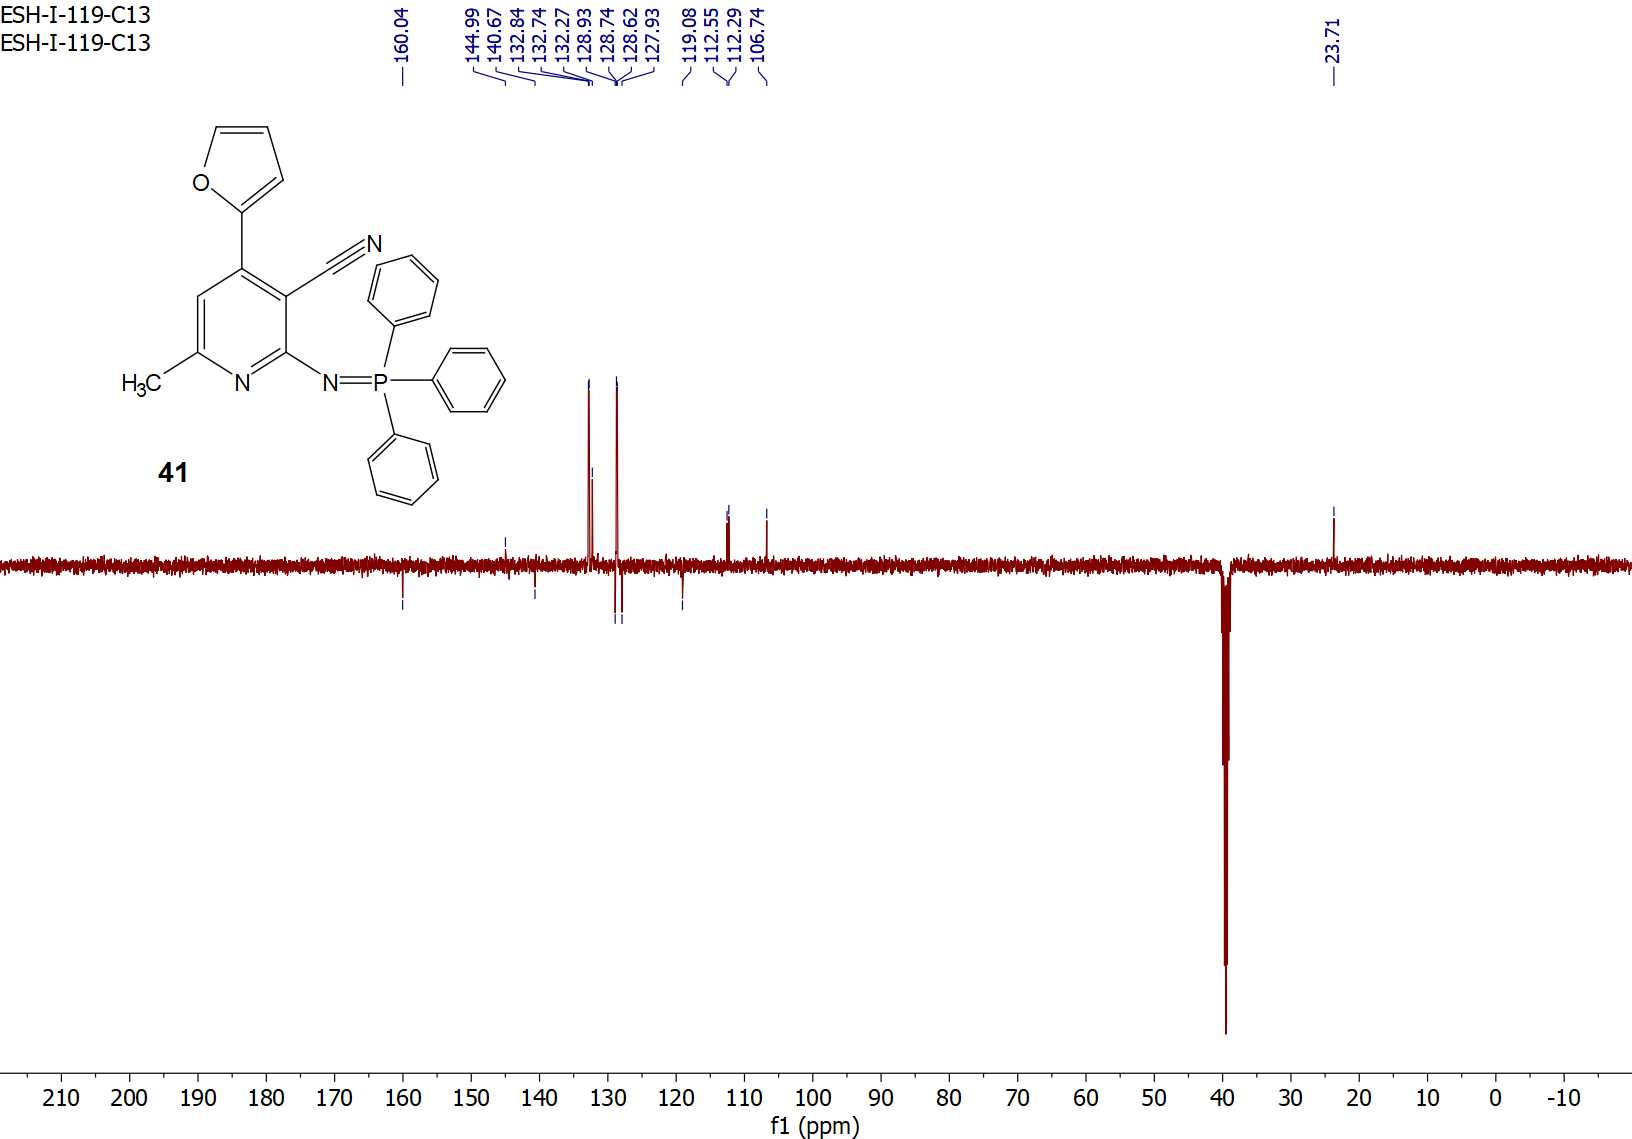


**Figure S71:** 13C-APT NMR spectrum of compound 41.


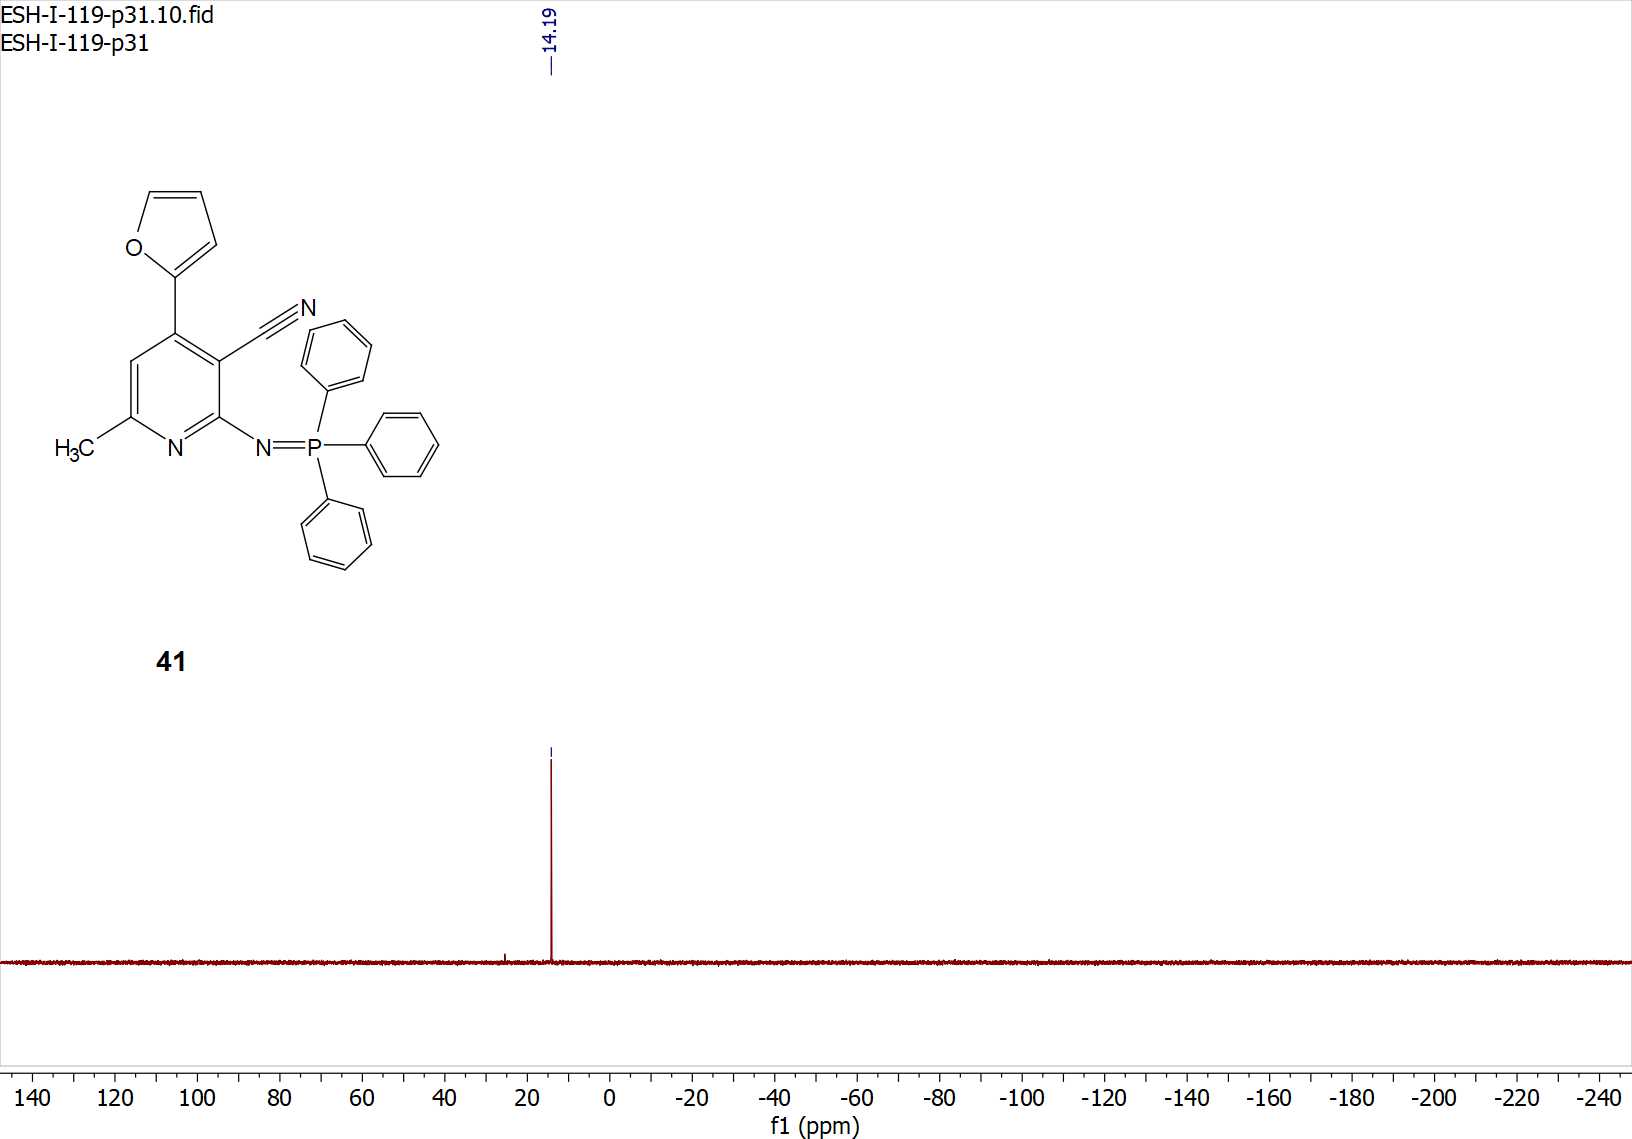


**Figure S72:** 31P-NMR spectrum of compound 41.

| Compounds’ codes in paper | Corresponding codes in elemental analysis and mass spectroscopy |
| --- | --- |
| 13 | ESH-4 |
| 14 | ESH-37 |
| 16 | ESH-98C |
| 18 | ESH-33 |
| 19 | ESH-43 |
| 20 | ESH-137 |
| 21 | ESH-41 |
| 22 | ESH-45 |
| 23 | ESH-143 |
| 24 | ESH-139 |
| 26 | ESH-124 |
| 27 | ESH-125 |
| 28 | ESH-147 |
| 29 | ESH-132 |
| 30 | ESH-133 |
| 31 | ESH-150 |
| 32 | ESH-146 |
| 33 | ESH-112 |
| 34 | ESH-128 |
| 35 | ESH-127 |
| 36 | ESH-149 |
| 37 | ESH-134 |
| 38 | ESH-135 |
| 39 | ESH-153 |
| 40 | ESH-148 |
| 41 | ESH-119 |

**Elemental analysis and Mass spectroscopy**

**Table S1:** Compounds’ codes and their corresponding codes in elemental analysis and mass spectroscopy figures.

**Elemental analysis**


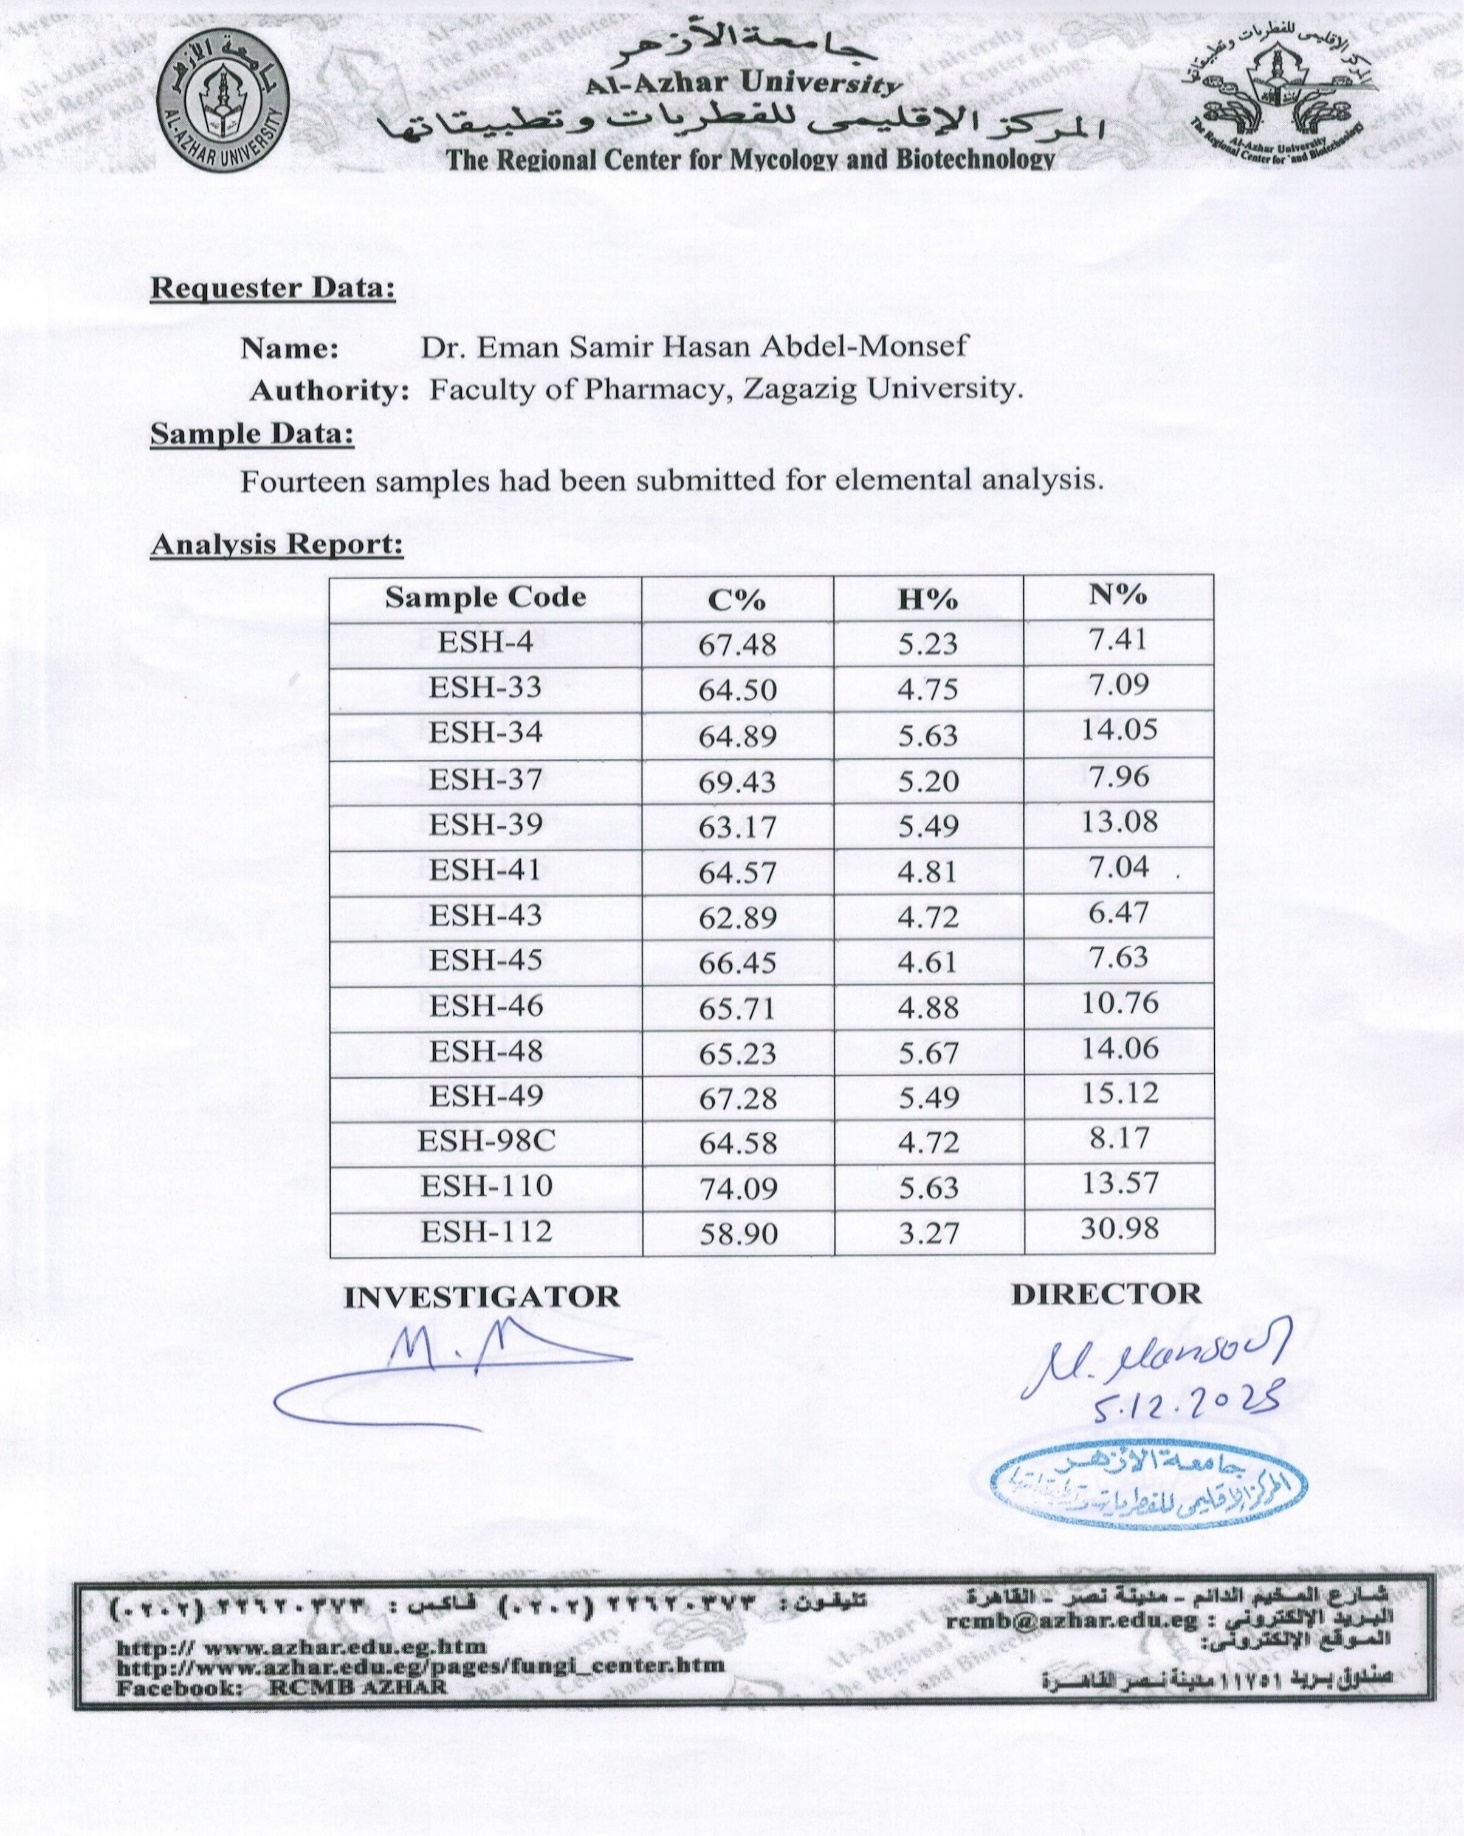


**Figure S73:** Elemental analysis of compounds13, 14, 16, 18, 19, 21, 22, 33.


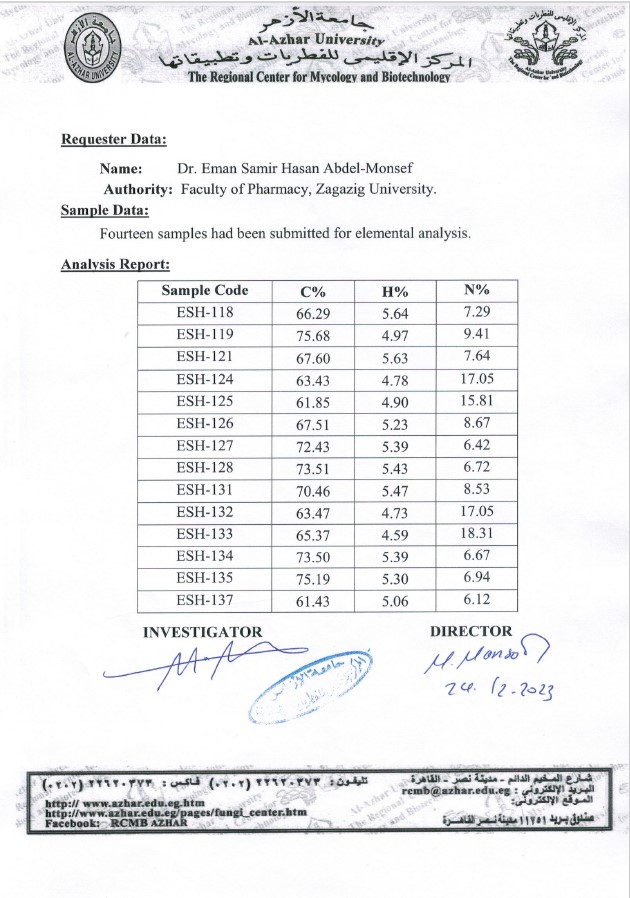


**Figure S74:** Elemental analysis of compounds20, 26, 27, 29, 30, 34, 35, 37, 38, 41.


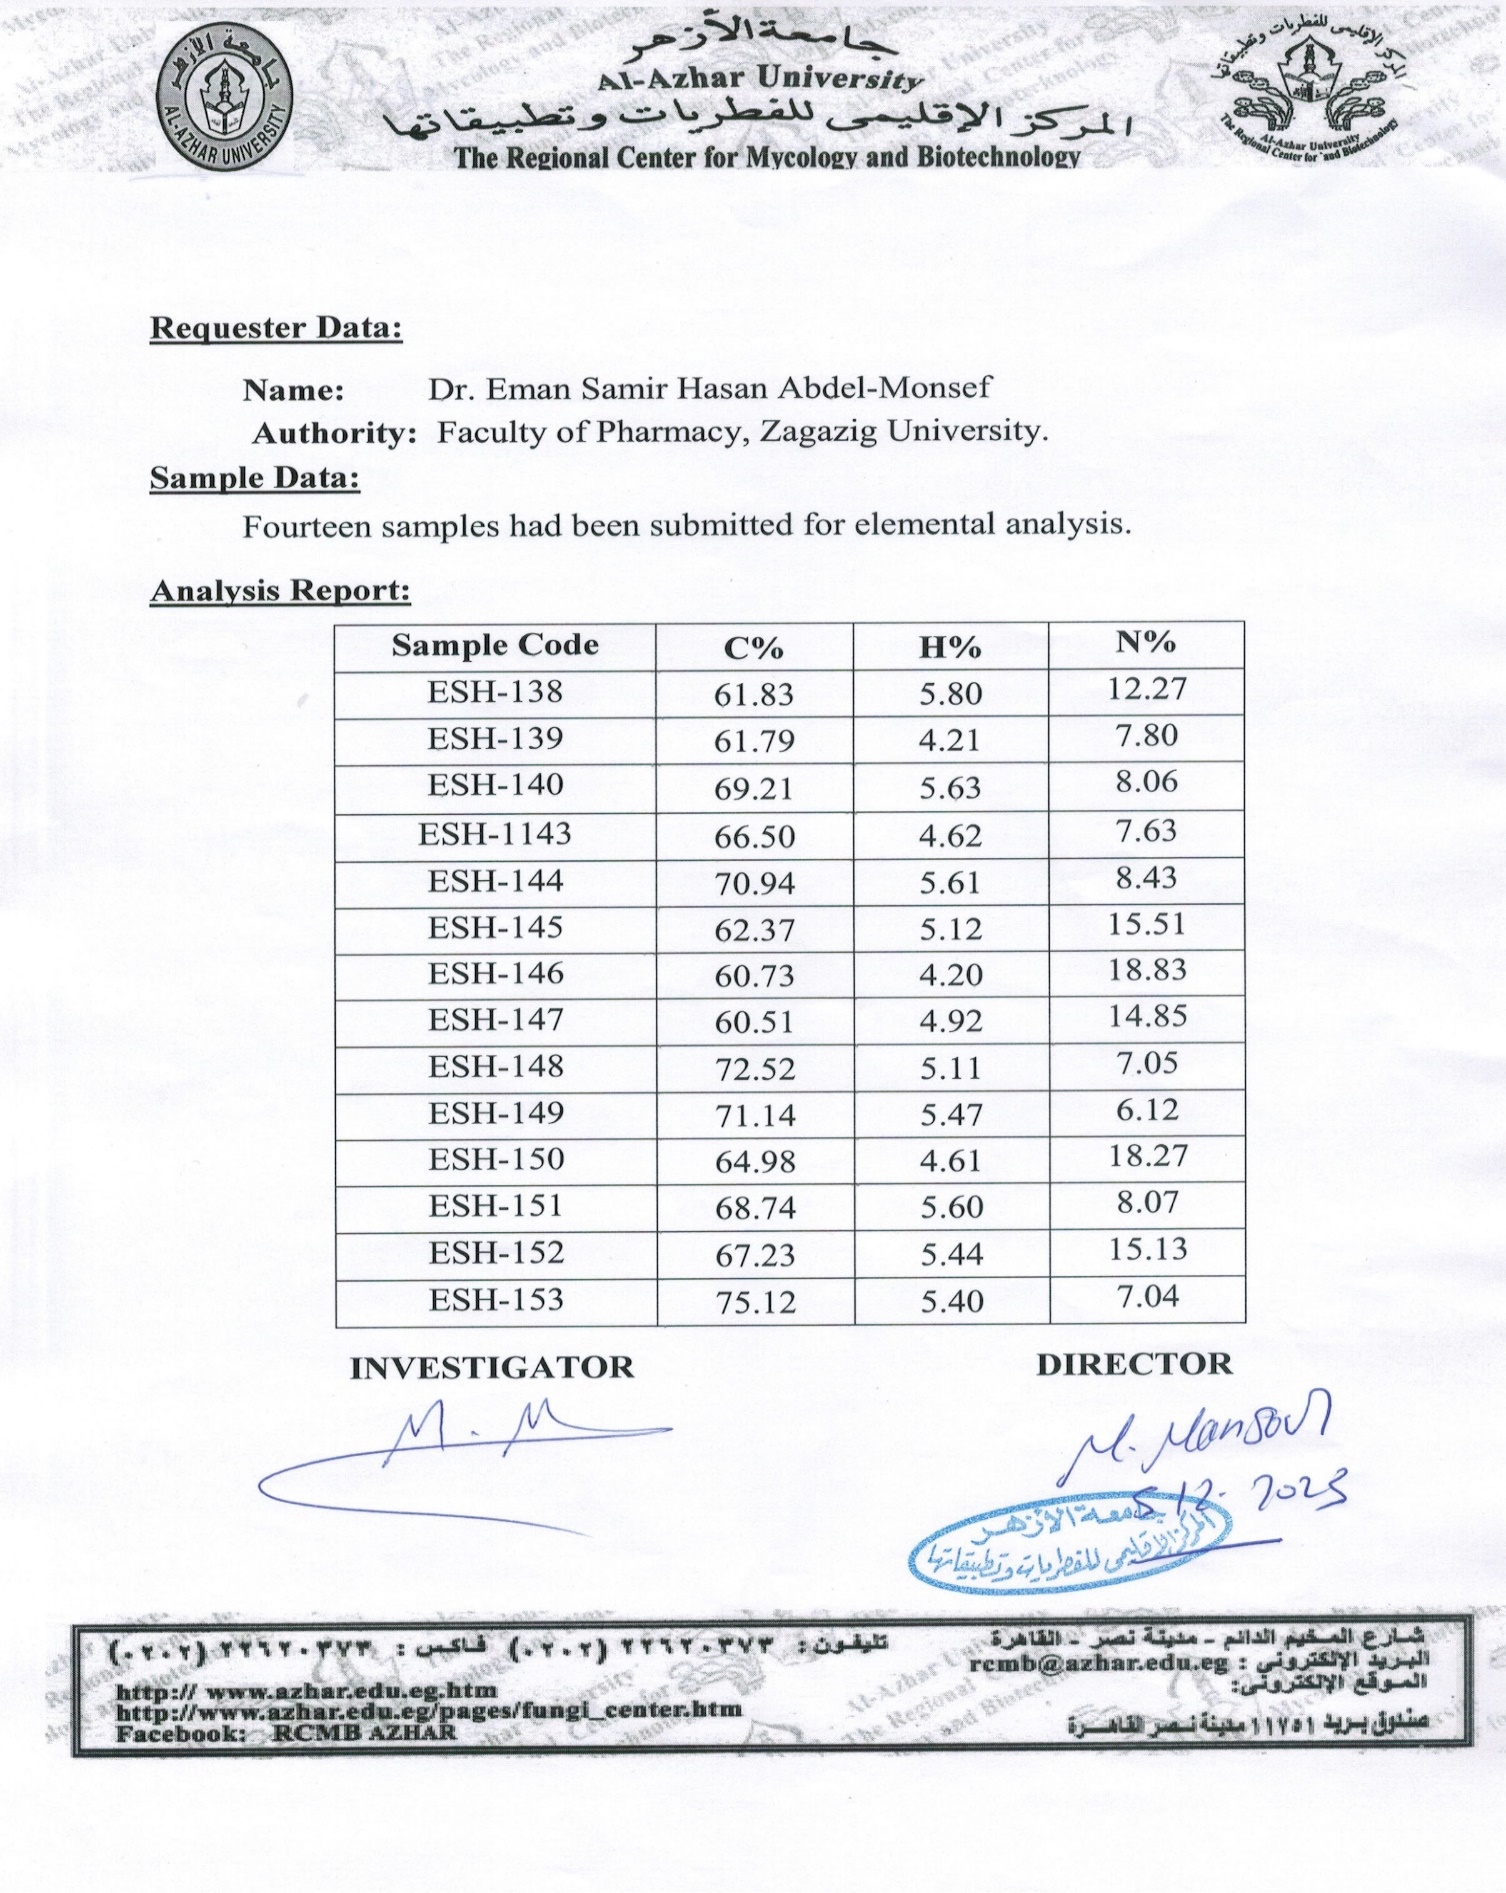


**Figure S75:** Elemental analysis of compounds23, 24, 28, 31, 32, 36, 39, 40.

**Mass spectroscopy**

**Figure S76:** Mass spectrum of compound 13.

**Figure S77:** Mass spectrum of compound 14.

**Figure S78:** Mass spectrum of compound 16.

**Figure S79:** Mass spectrum of compound 18.

**Figure S80:** Mass spectrum of compound 19.

**Figure S81:** Mass spectrum of compound 20.

**Figure S82:** Mass spectrum of compound 21.

**Figure S83:** Mass spectrum of compound 22.

**Figure S84:** Mass spectrum of compound 23.

**Figure S85:** Mass spectrum of compound 24.

**Figure S86:** Mass spectrum of compound 26.

**Figure S87:** Mass spectrum of compound 27.

**Figure S88:** Mass spectrum of compound 28.

**Figure S89:** Mass spectrum of compound 29.

**Figure S90:** Mass spectrum of compound 30.

**Figure S91:** Mass spectrum of compound 31.

**Figure S92:** Mass spectrum of compound 32.

**Figure S93:** Mass spectrum of compound 33.

**Figure S94:** Mass spectrum of compound 34.

**Figure S95:** Mass spectrum of compound 35.

**Figure S96:** Mass spectrum of compound 36.

**Figure S97:** Mass spectrum of compound 37.

**Figure S98:** Mass spectrum of compound 38.

**Figure S99:** Mass spectrum of compound 39.

**Figure S100:** Mass spectrum of compound 40.

**Figure S101:** Mass spectrum of compound 41.

**IR spectra**


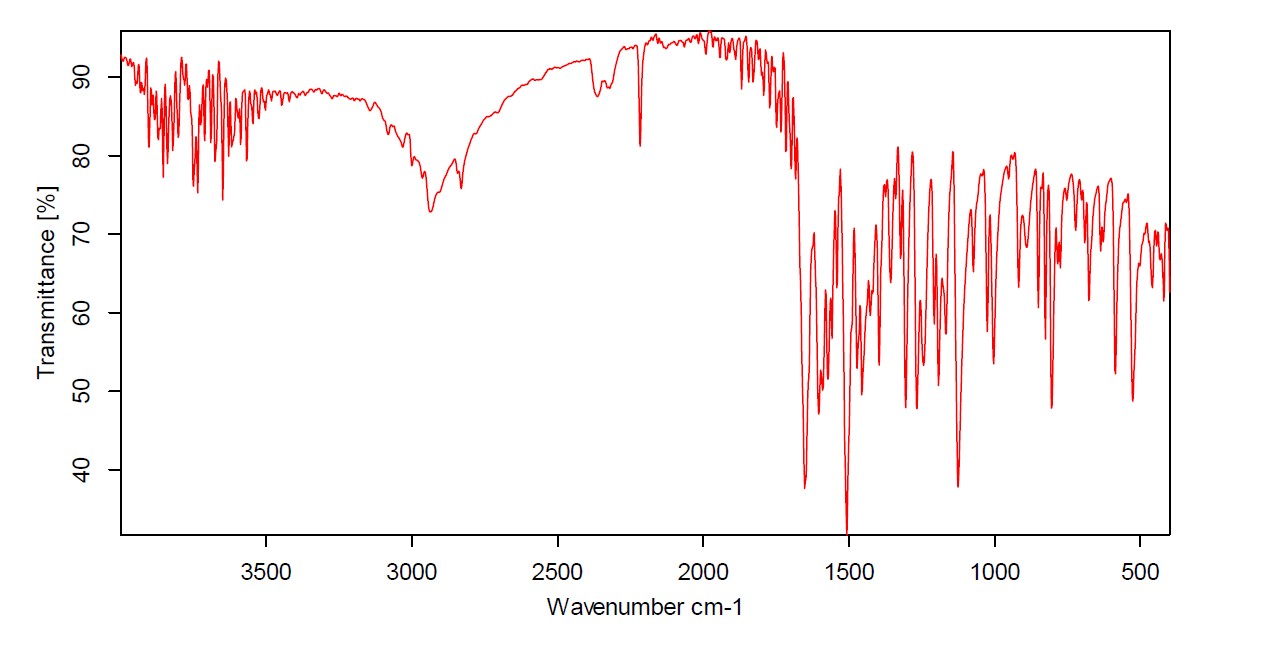


**Figure S102:** IR spectrum of compound 10


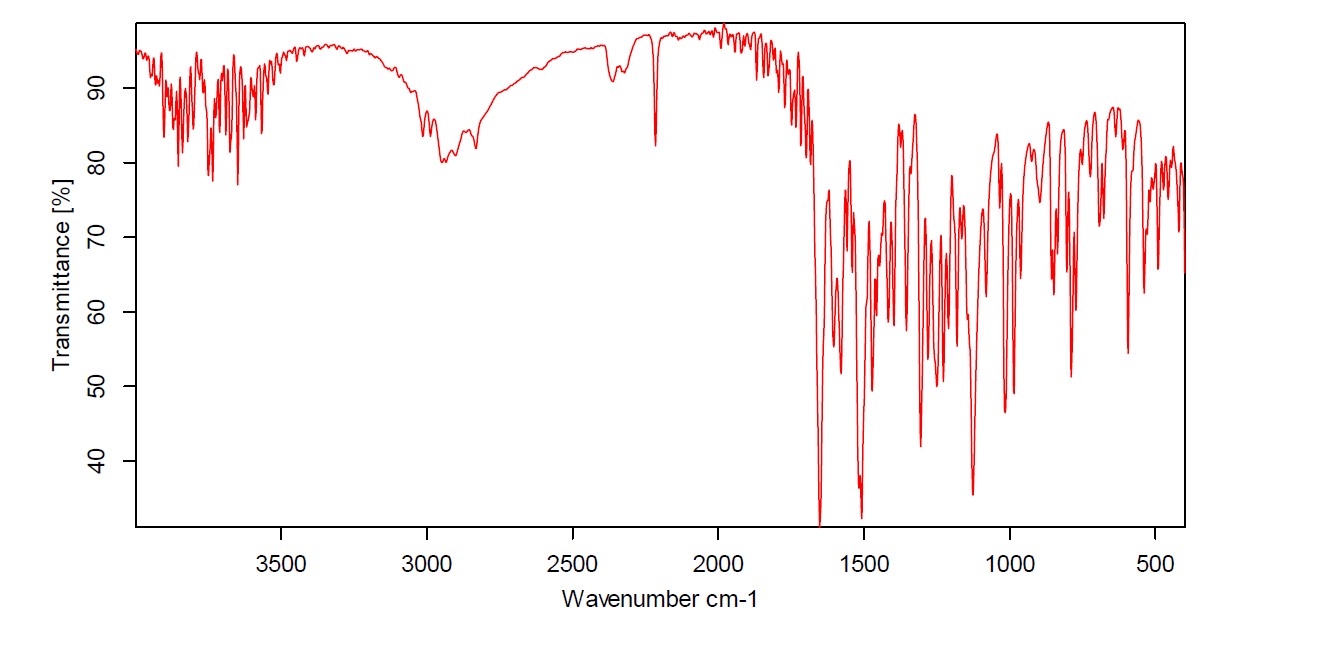


**Figure S103:** IR spectrum of compound 11.


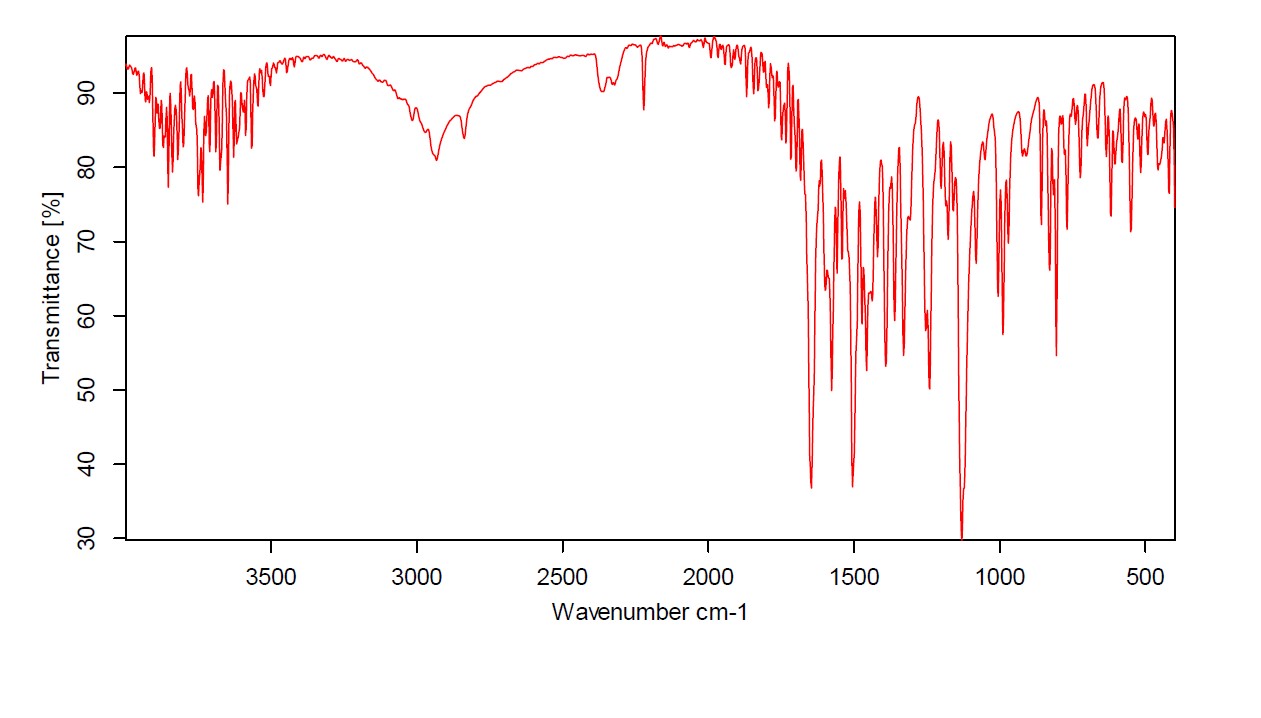


**Figure S104:** IR spectrum of compound 12.


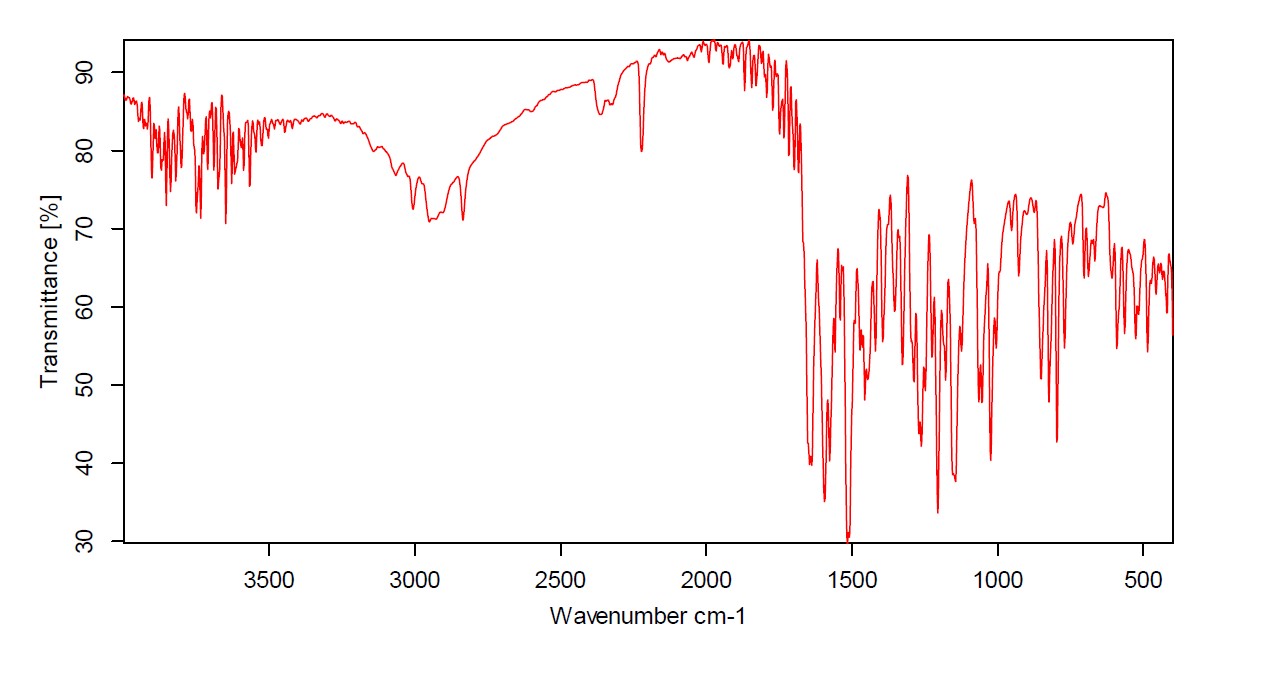


**Figure S105:** IR spectrum of compound 13.


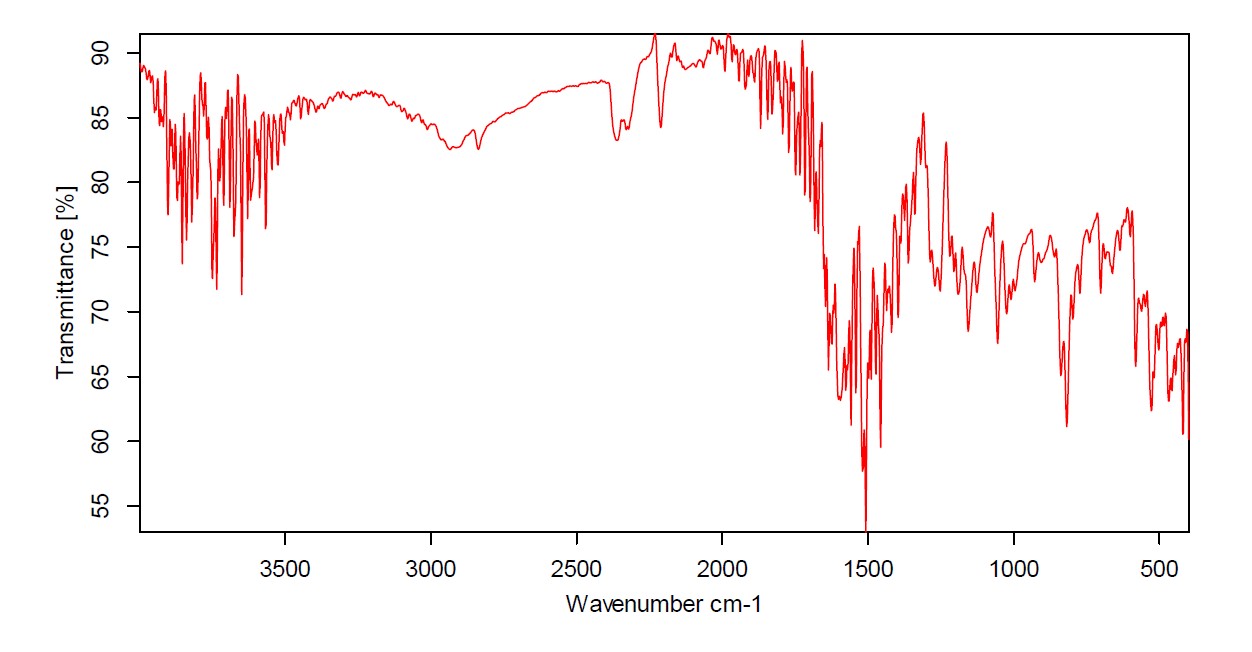


**Figure S106:** IR spectrum of compound 14.


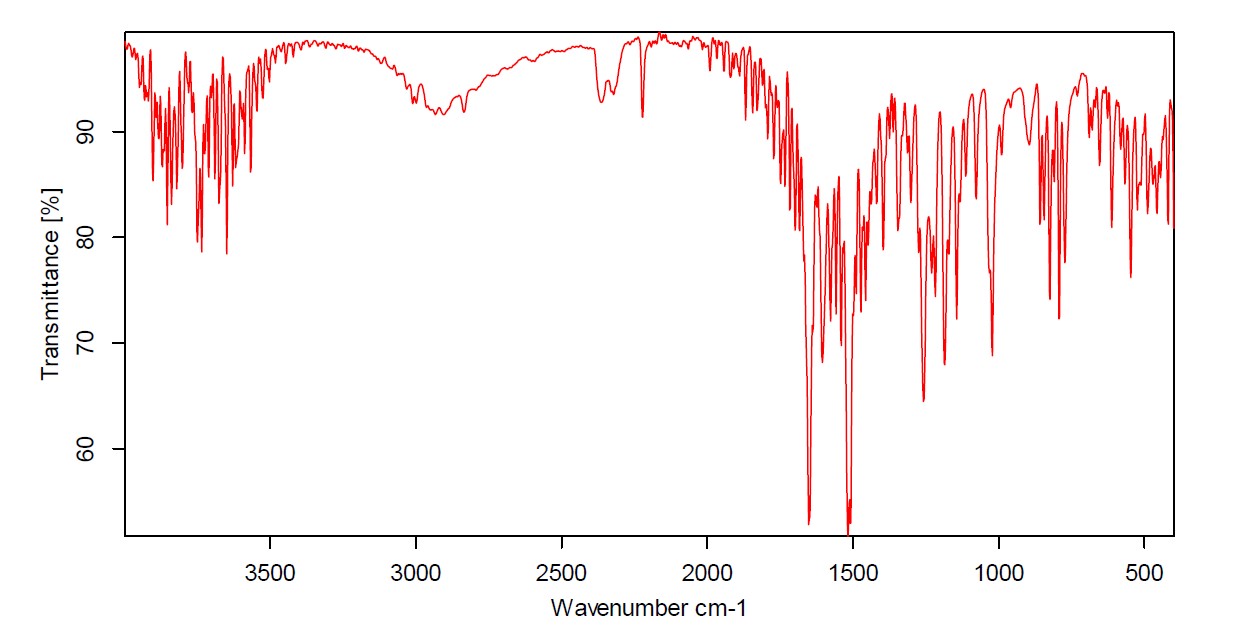


**Figure S107:** IR spectrum of compound 15.


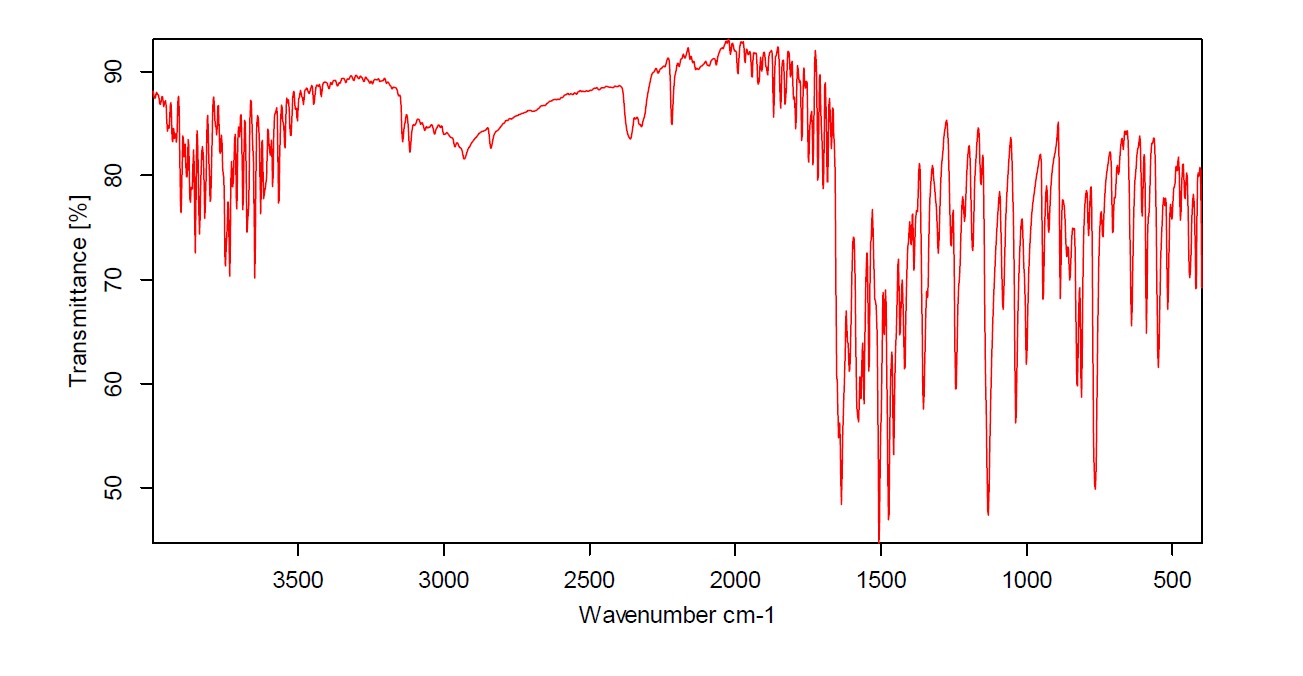


**Figure S108:** IR spectrum of compound 16.


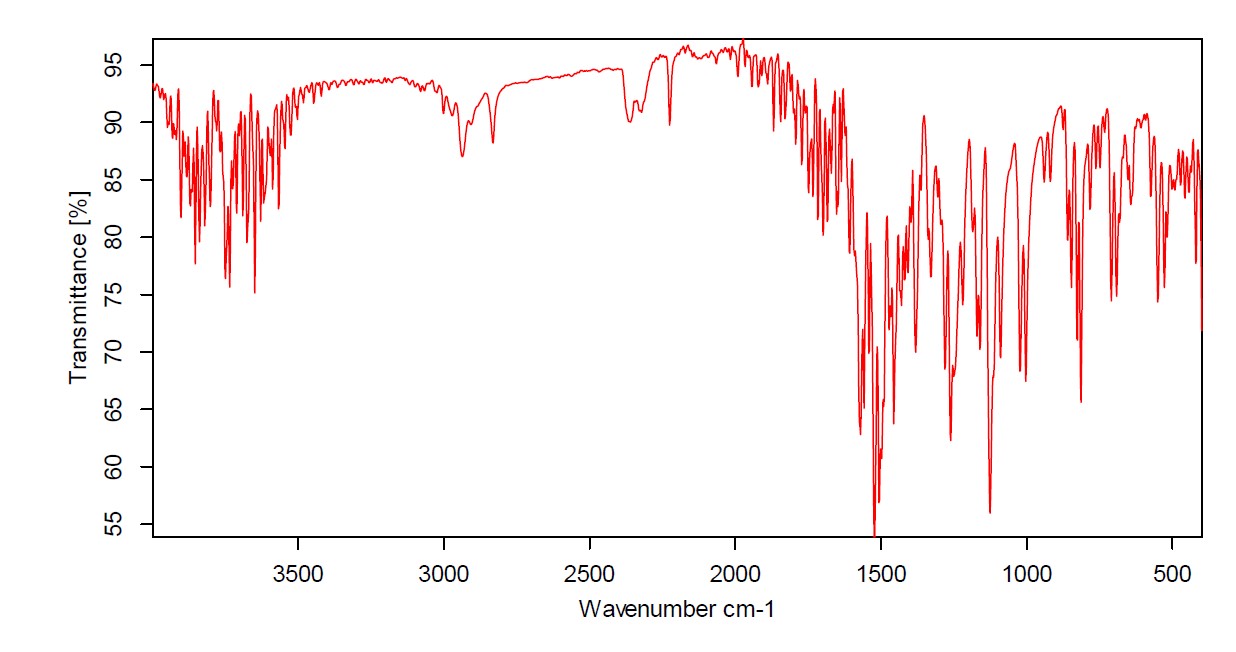


**Figure S109:** IR spectrum of compound 18.


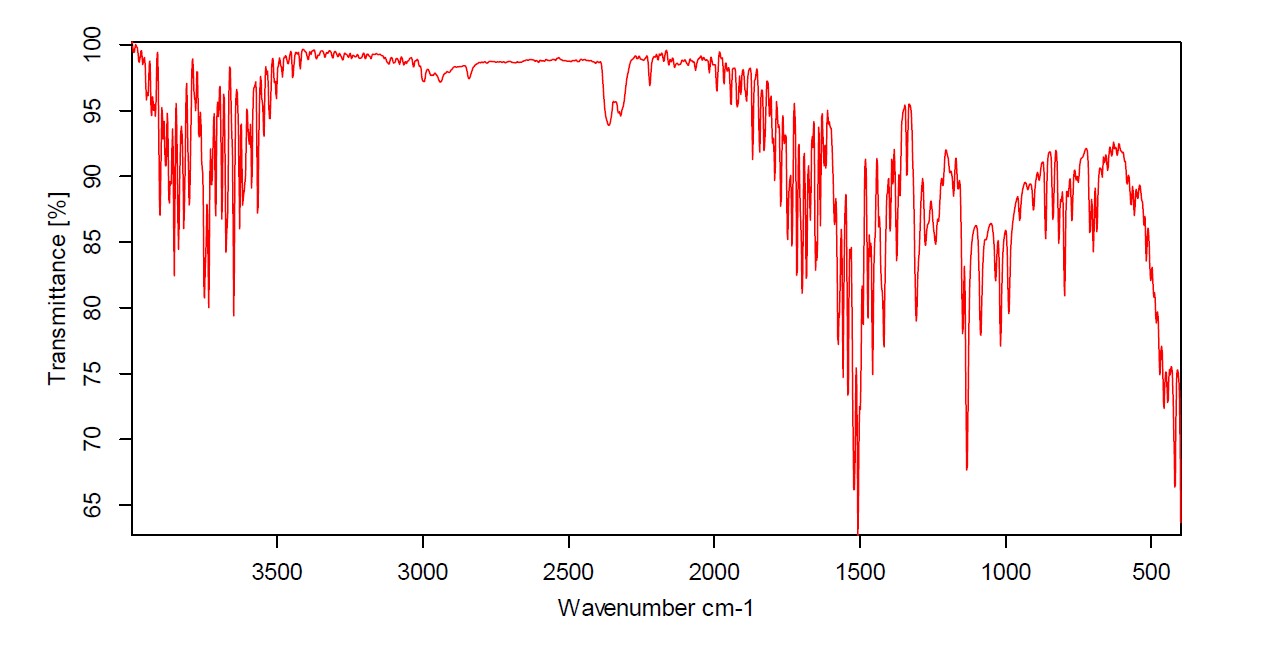


**Figure S110:** IR spectrum of compound 19.


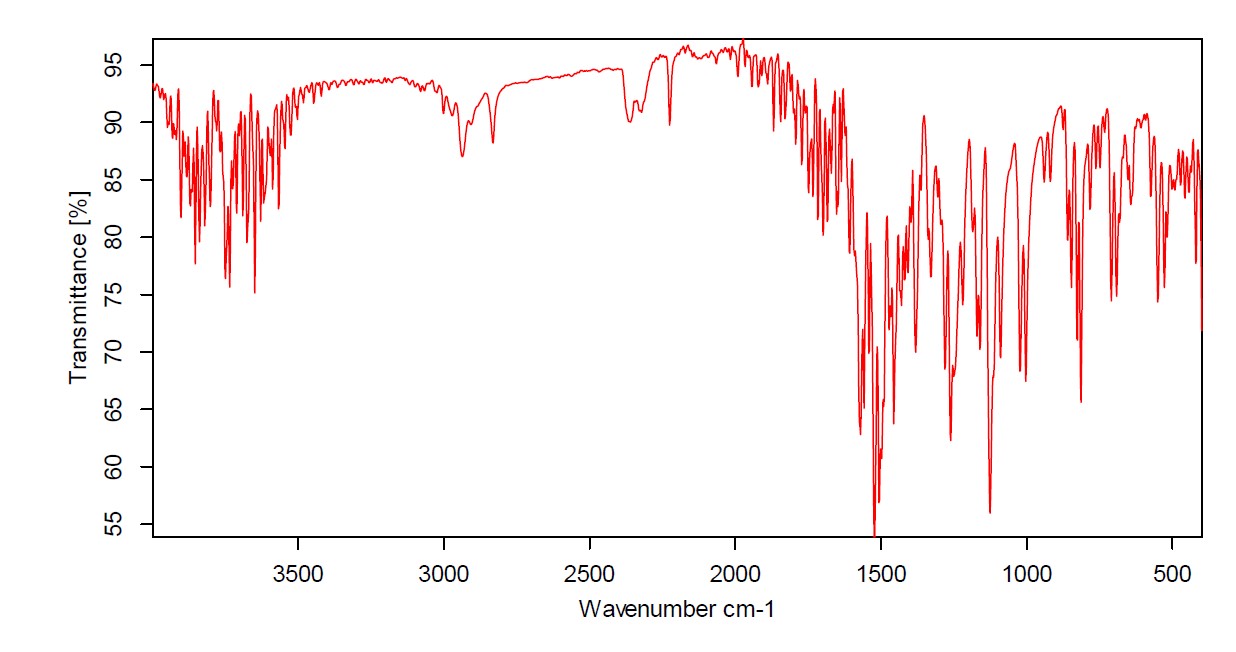


**Figure S111:** IR spectrum of compound 20.


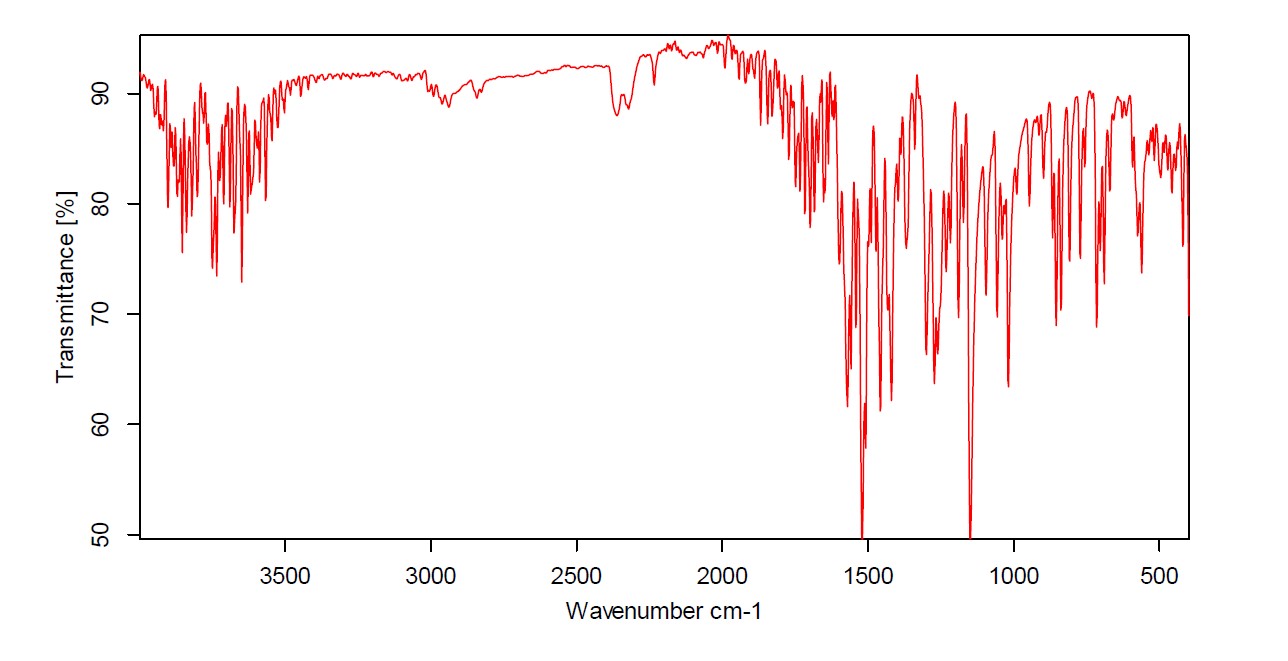


**Figure S112:** IR spectrum of compound 21.


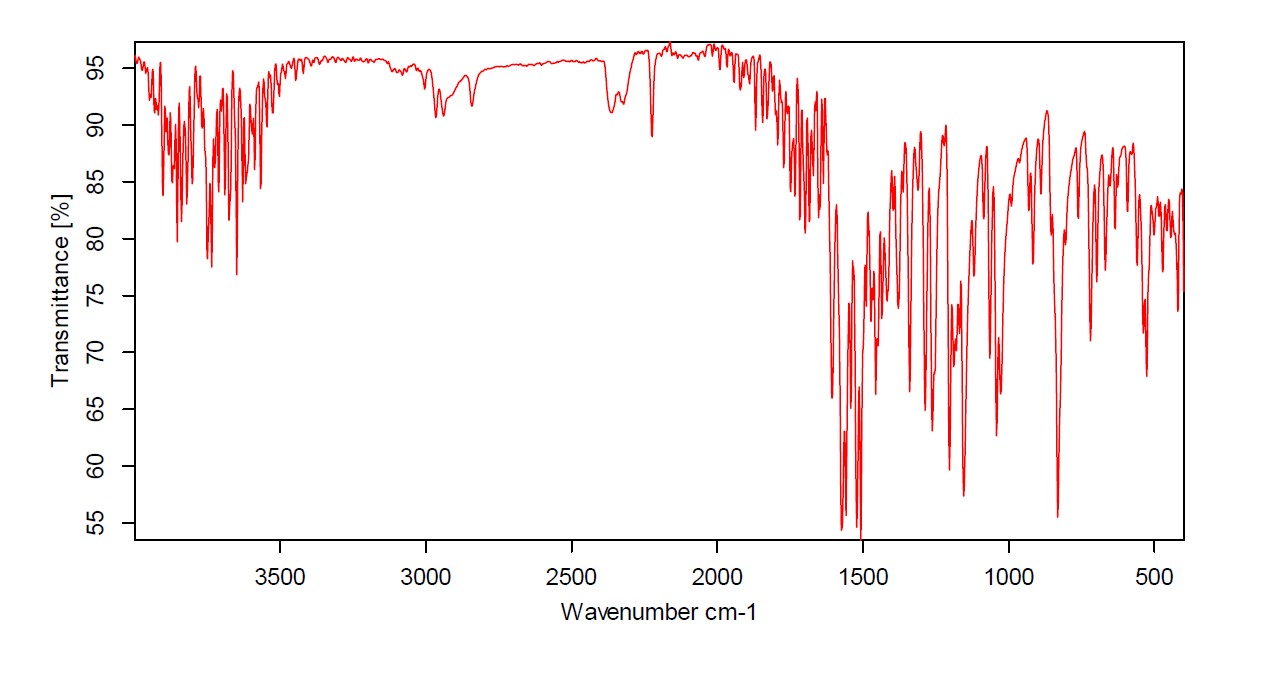


**Figure S113:** IR spectrum of compound 22.


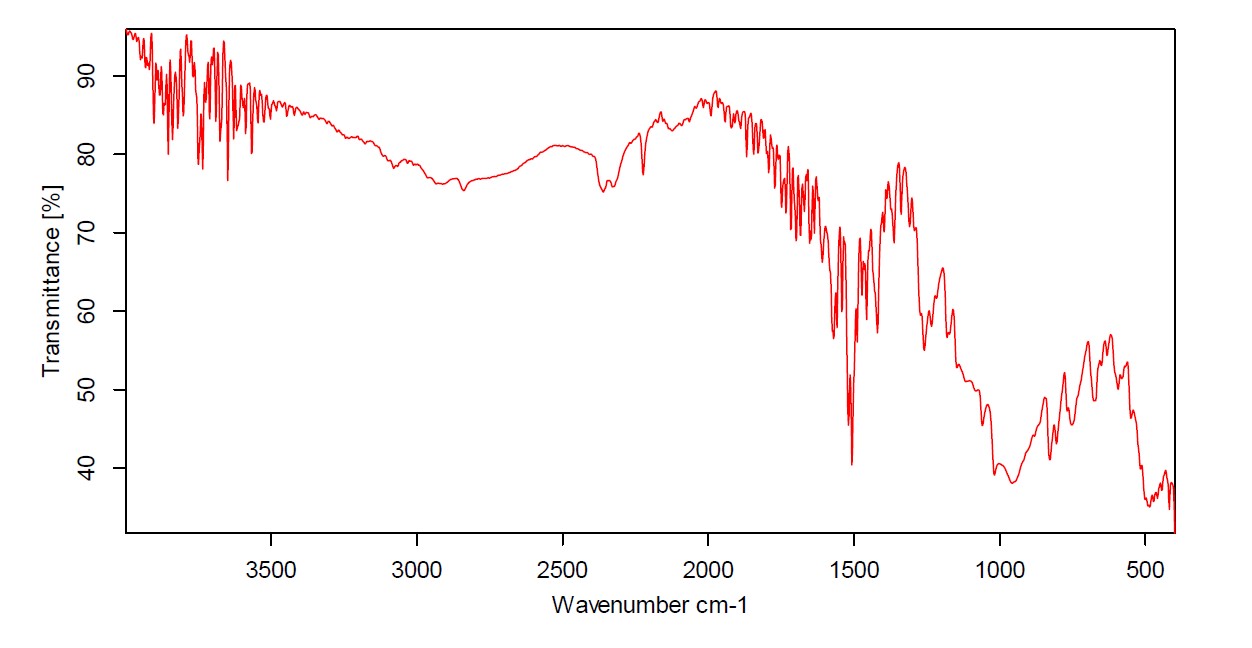


**Figure S114:** IR spectrum of compound 23.


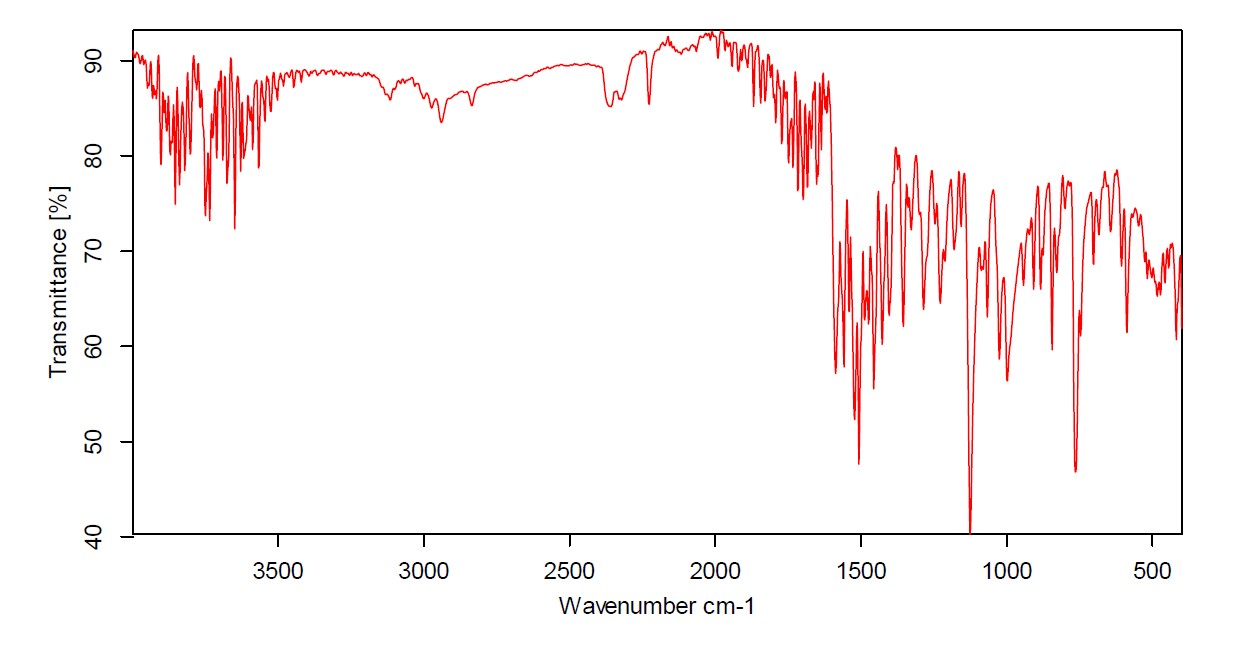


**Figure S115:** IR spectrum of compound 24.


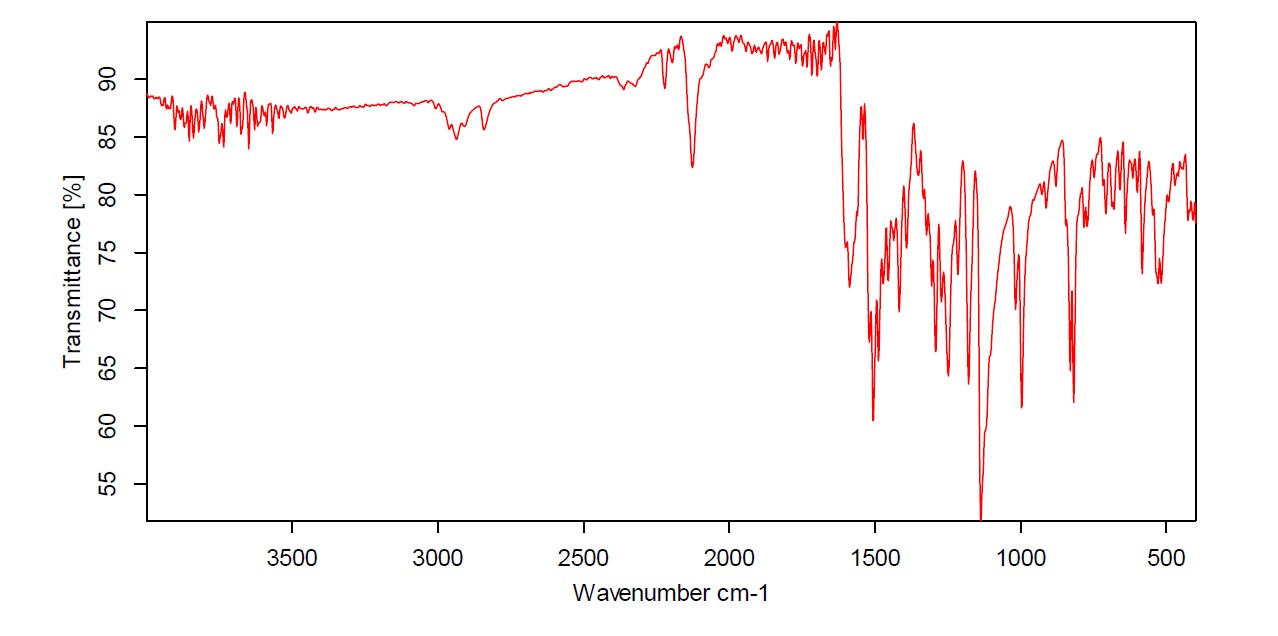


**Figure S116:** IR spectrum of compound 26.


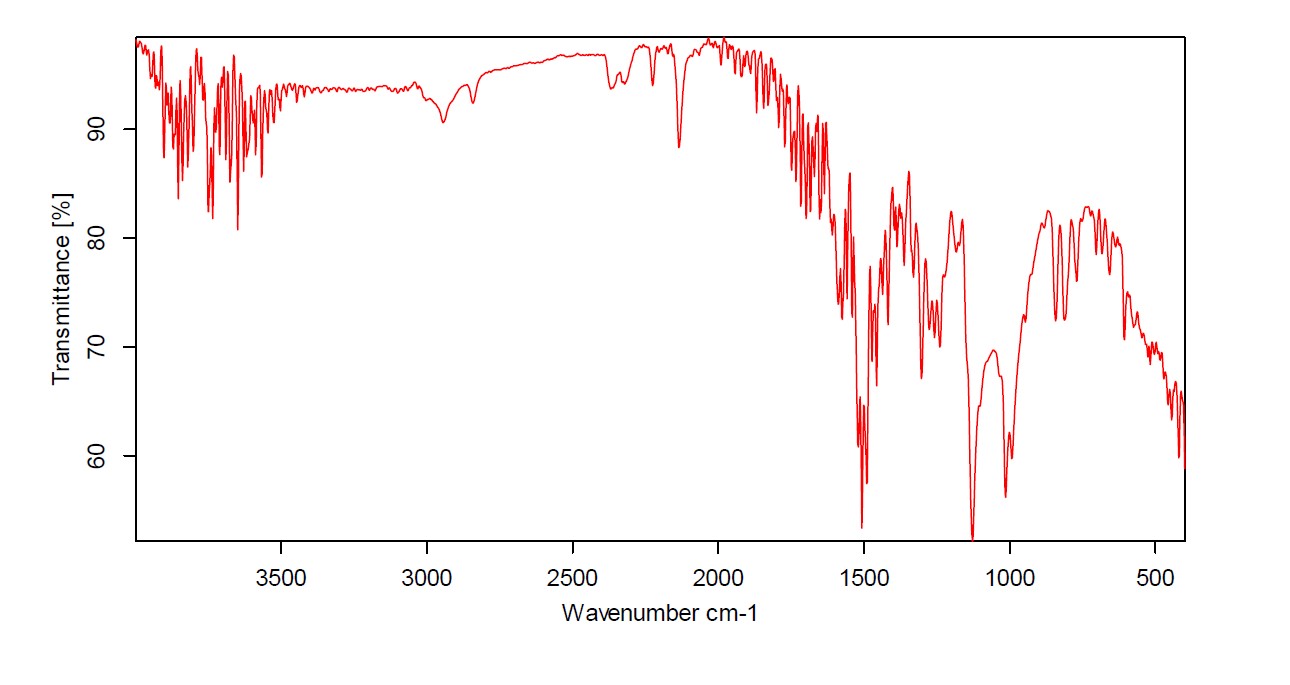


**Figure S117:** IR spectrum of compound 27.


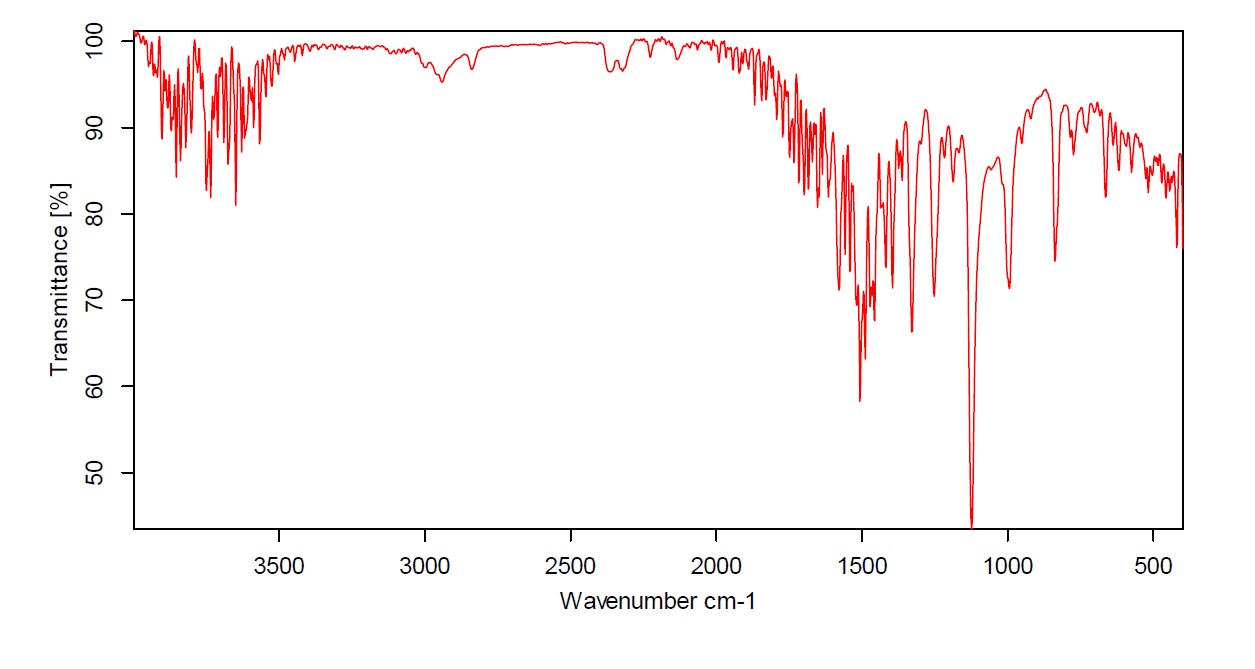


**Figure S118:** IR spectrum of compound 28.


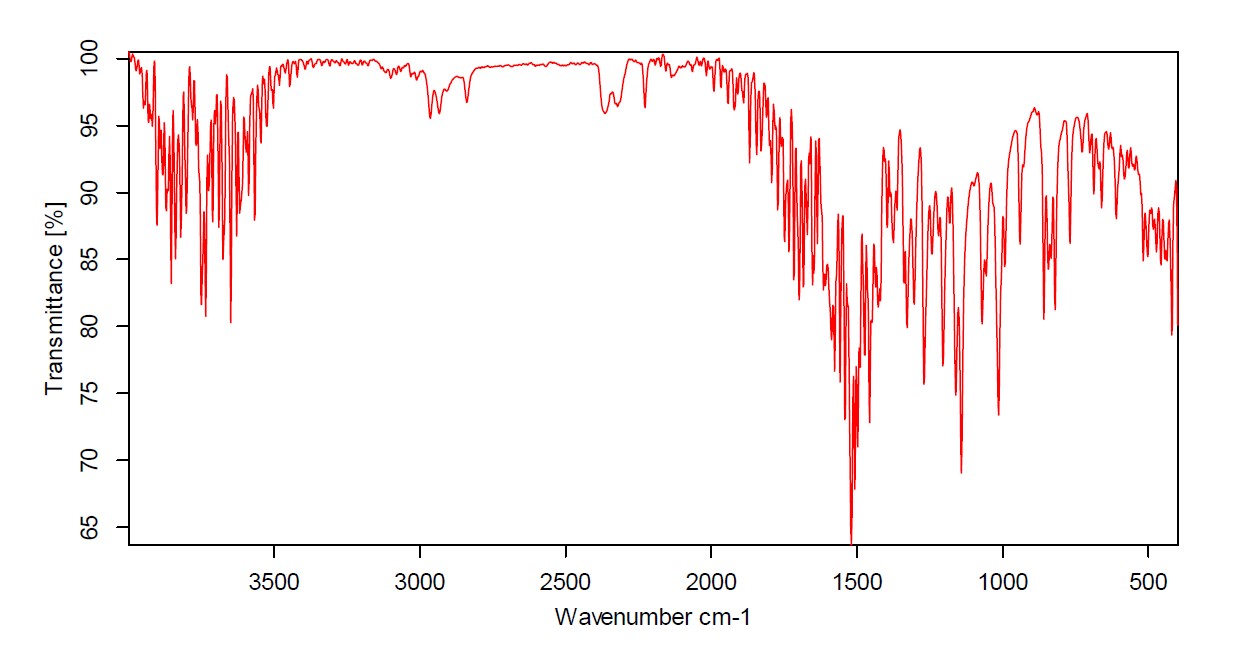


**Figure S119:** IR spectrum of compound 29.


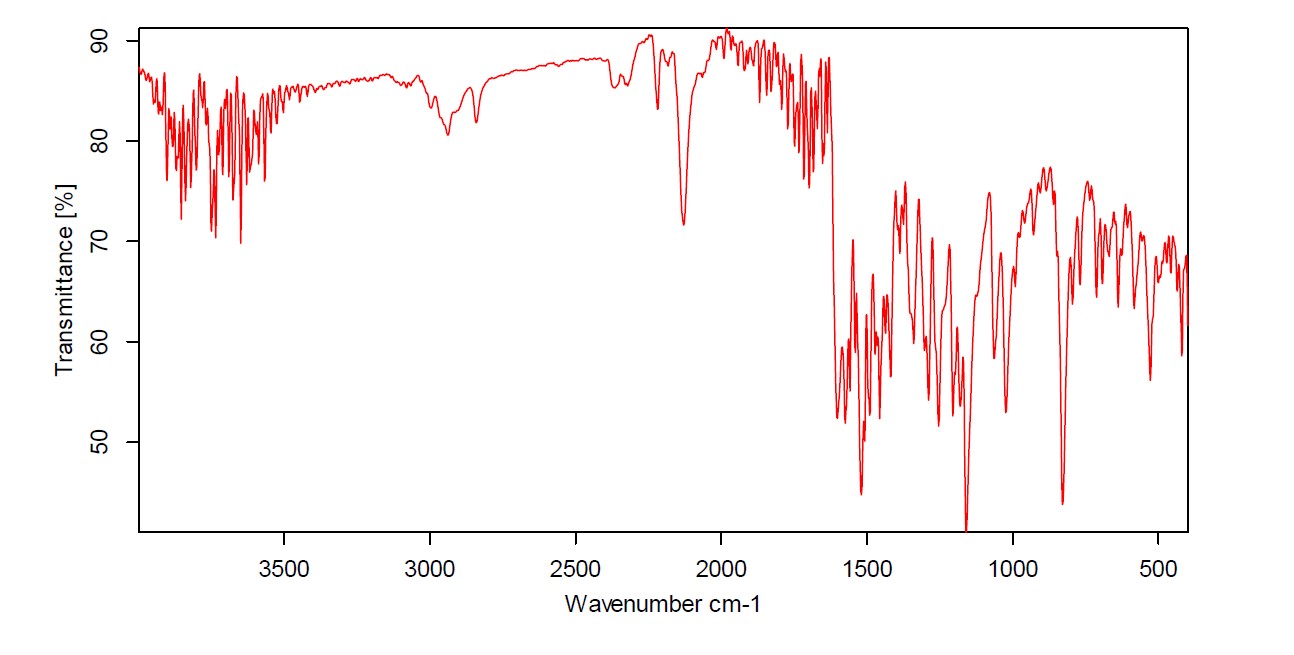


**Figure S120:** IR spectrum of compound 30.


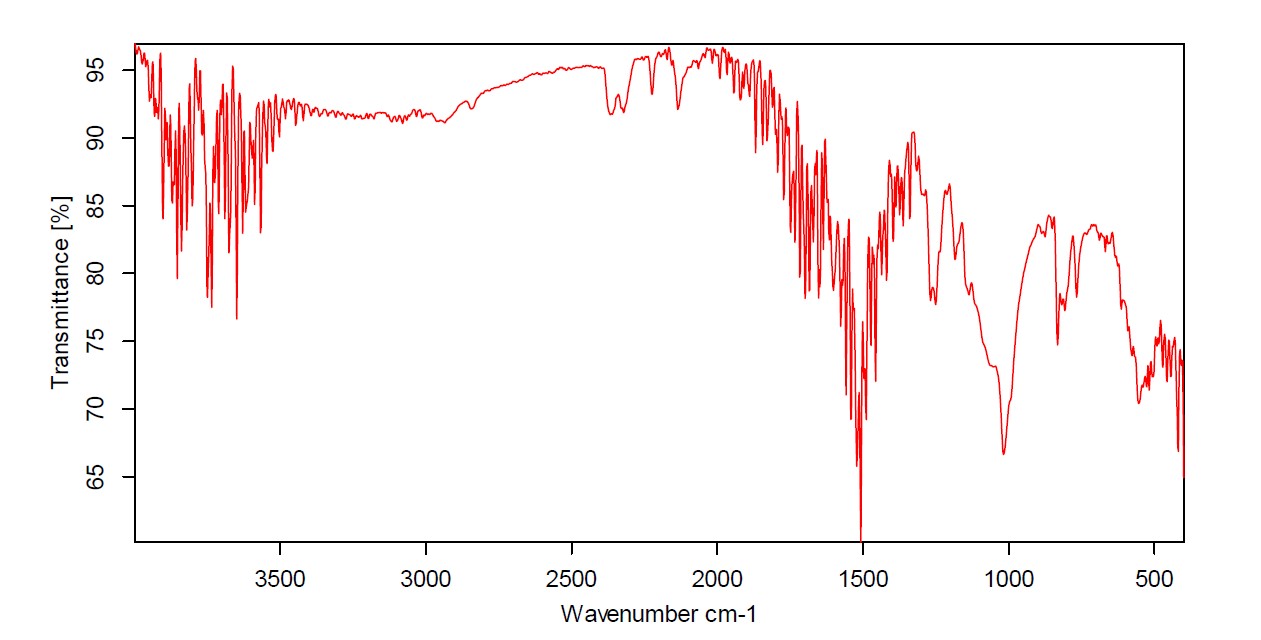


**Figure S121:** IR spectrum of compound 31.


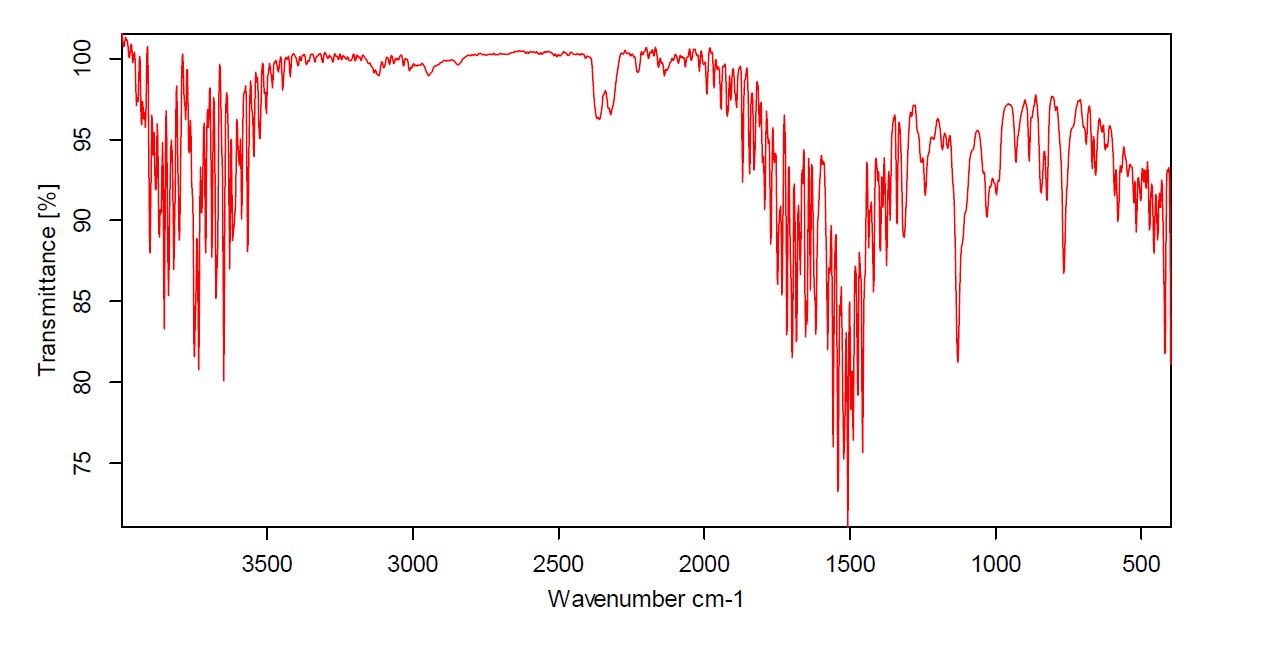


**Figure S122:** IR spectrum of compound 32.


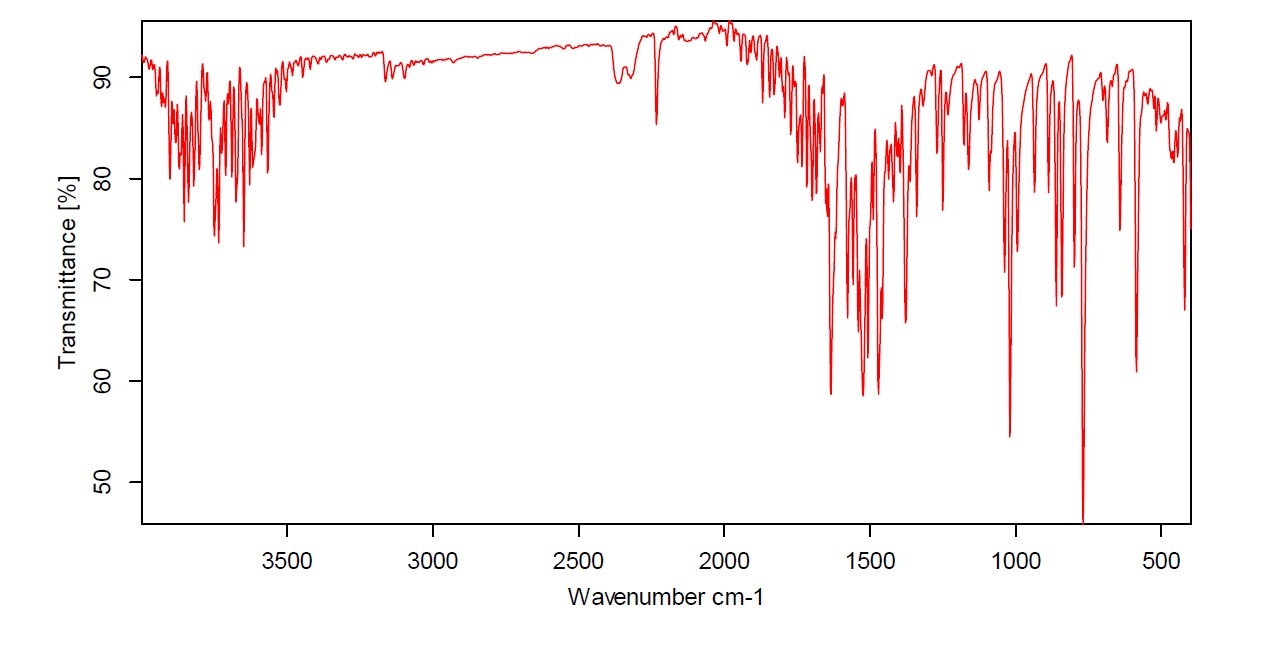


**Figure S123:** IR spectrum of compound 33.


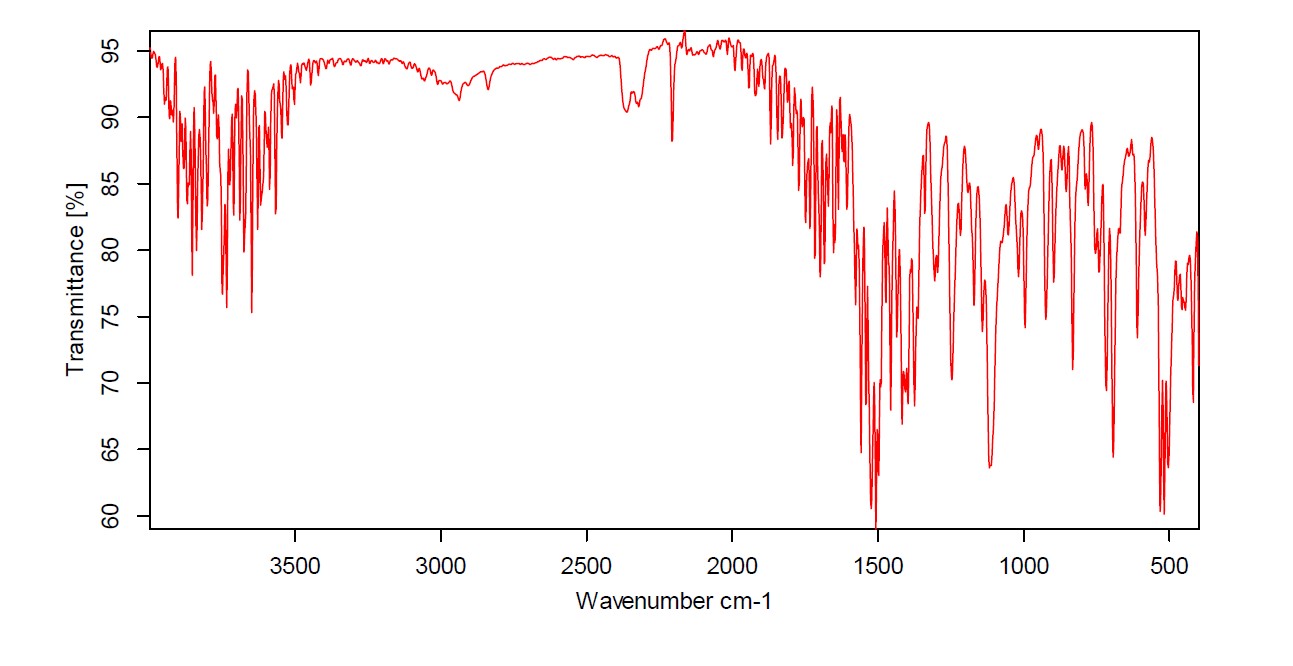


**Figure S124:** IR spectrum of compound 34.


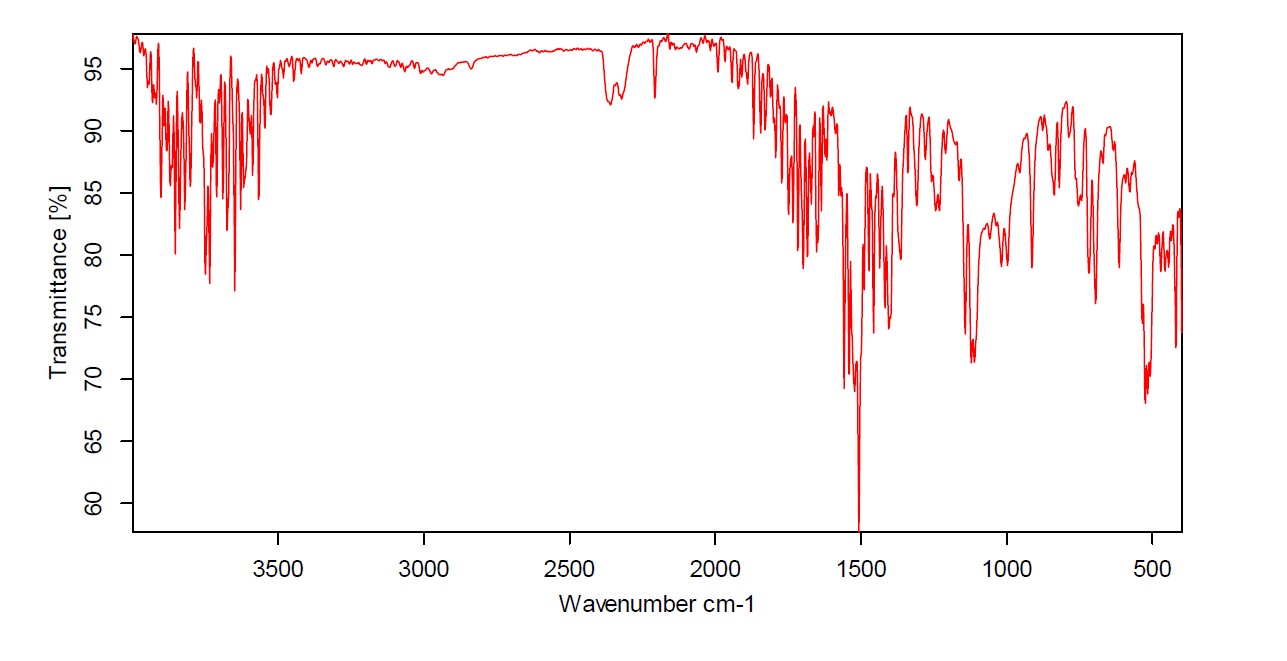


**Figure S125:** IR spectrum of compound 35.


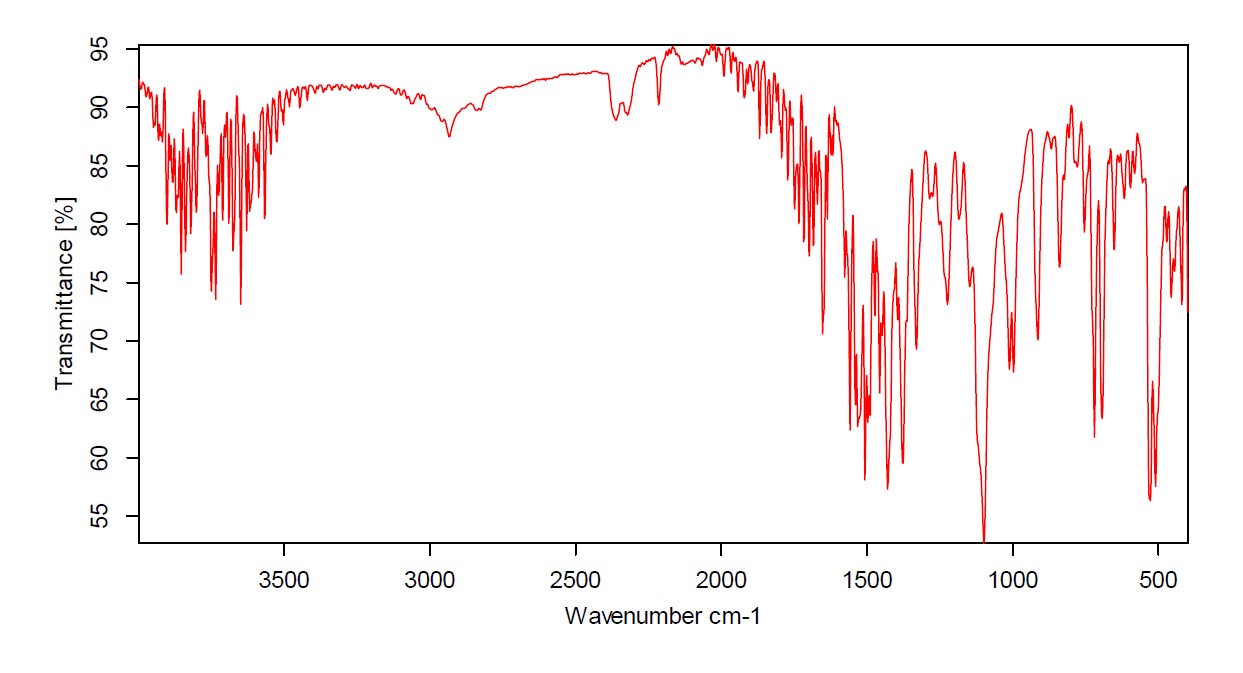


**Figure S126:** IR spectrum of compound 36.

**Figure S127:** IR spectrum of compound 37.

**Figure S128:** IR spectrum of compound 38.

**Figure S129:** IR spectrum of compound 39.

**Figure S130:** IR spectrum of compound 40.

**Figure S131:** IR spectrum of compound 41.

**UV-Vis analyses**

**Figure S132:** UV spectrum of compound 10.

**Figure S133:** UV spectrum of compound 11.

**Figure S134:** UV spectrum of compound 12.

**Figure S135:** UV spectrum of compound 13.

**Figure S136:** UV spectrum of compound 14.

**Figure S137:** UV spectrum of compound 15.

**Figure S138:** UV spectrum of compound 16.

**Figure S139:** UV spectrum of compound 18.

**Figure S140:** UV spectrum of compound 19.

**Figure S141:** UV spectrum of compound 20.

**Figure S142:** UV spectrum of compound 21.

**Figure S143:** UV spectrum of compound 22.

**Figure S144:** UV spectrum of compound 23.

**Figure S145:** UV spectrum of compound 24.

**Figure S146:** UV spectrum of compound 26.

**Figure S147:** UV spectrum of compound 27.

**Figure S148:** UV spectrum of compound 28.

**Figure S149:** UV spectrum of compound 29.

**Figure S150:** UV spectrum of compound 30.

**Figure S151:** UV spectrum of compound 31.

**Figure S152:** UV spectrum of compound 32.

**Figure S153:** UV spectrum of compound 33.

**Figure S154:** UV spectrum of compound 34.

**Figure S155:** UV spectrum of compound 35.

**Figure S156:** UV spectrum of compound 36.

**Figure S157:** UV spectrum of compound 37.

**Figure S158**: UV spectrum of compound 38.

**Figure S159:** UV spectrum of compound 39.

**Figure S160:** UV spectrum of compound 40.

**Figure S161:** UV spectrum of compound 41.

**S4.2.6. In silico study**

**S4.2.6.1. Density Functional Theory (DFT) Calculations:**

All quantum chemical calculations were performed using the Schrödinger Maestro 2025-2suite with the Jaguar module. Initial geometries of the azide and tetrazole tautomeric forms were built and pre-optimized in Maestro. Full geometry optimizations were then carried out at the B3LYP-D3/6-31G** level of theory with implicit solvation in water using the polarizablecontinuummodel(PCM). Single-point energy refinements were subsequently performed at the B3LYP-D3/6-31+G** level of theory in the same solvent model (PCM, water), using the optimized geometries from the prior step.

Relative free energies (ΔG, kcal·mol⁻¹) between azide and tetrazole forms were calculated as the electronic energy difference between tautomeric pairs, converted from Hartree to kcal·mol⁻¹ (1 Ha = 627.5095 kcal·mol⁻¹).

Equilibrium constants (K) were determined using the Boltzmann relationship:

*K* =

Where R = 1.987 cal K-1 mol-1 and T = 298 K

Population distributions (%) for each tautomer were derived from the Boltzmann weights of the two-state system. All reported values correspond to solution-phase free energies at 298 K.

This was done on three compounds (26, 27, 33) containing an azido-functional group with an ortho-pyridyl nitrogen, enabling the tautomerization into a tetrazole form

Raw Data (after B3LYP-D3/6-31G** geometry optimizations):

| **compound** | **Solution-phase energy (Hartree)** |
| --- | --- |
| 33 (Az) | -722.331647 |
| 33 (Tet) | -722.329822 |
| 26 (Az) | -1424.437278 |
| 26 (Tet) | -1424.439053 |
| 27 (Az) | -1538.965887 |
| 27 (Tet) | -1538.966820 |

**Table S2.** Solution-phase energies in Hartree after geometry optimization (26, 27, 33)

**Sample Calculation of relative free energies and tautomeric populations (Az vs. Tet):**

**Input data (solution-phase single-point energies, Hartree):**

- Azide 26: EAz = -1424.437278 Ha
- Tetrazole 26: ETet = -1424.439053 Ha

**Step 1. Energy difference (Hartree):**

ΔE = ETet - EAz = -1424.439053 - (- 1424.437278) = - 0.001775 Ha

**Step 2. Convert to kcal mol⁻¹:**

Conversion factor: 1 Ha = 627.5095 kcal mol-1

ΔG = -0.001775 Ha x 627.5095 = - 1.11 kcal mol-1

**Step 3. Convert to kJ mol⁻¹:**

ΔG = -1.11 kcal mol-1 x 4.184 kJ mol-1 = - 4.66 kJ mol-1

**Step 4. Equilibrium constant (at 298 K):**

*K* =

Where R = 1.987 cal K-1 mol-1 and T = 298 K

K = e−(−1.11/0.5929) = 6.55

**Step 5. Population distribution:**

PAz = 1/(1+K) = 1/(1+6.55) = 0.132 = 13.2%

PTet = 100% - 13.2% = 86.8%

- ΔG = −1.11 kcal·mol⁻¹ (tetrazole lower)
- Populations: Azide 13.2%, Tetrazole 86.8%

**26 (Tet)**

**26 (Az)**

**27 (Tet)**

**27 (Az)**

**33 (Tet)**

**33 (Az)**

**Figure S162:** DFT-based low energy conformations of azide/tetrazole tautomers

**S4.2.6.2. Computational Modelling & Docking:**

The computational studies described involved the use of Schrödinger’s Maestro v14.2.1 (2025-3) with access provided under a single academic user license. Calculations used the following modules: ConfGen, Epik, Glide, LigPrep, MacroModel, Prime, ProtPrep, SiteMap and the Optimized Potential for Liquid Simulations (OPLS5e) force field. A pH of 7.00 ± 2.00 was set when appropriate along with the use of H2O (solvation parameter). Other software used include ChemDraw Professional v25.0 and the RSCB protein data bank ([www.rcsb.org/](http://www.rcsb.org/)).

To start, three relevant target crystals were selected and downloaded from the PDB. These included human TopII ATPase domain bound to AMP-PNP (PDB 1ZXM), human TopII in complex with DNA and anti-cancer agent etoposide (PDB 3QX3), and the tubulin-RB3-SLD-TTL complex bound to ABI-274. These three proteins underwent a standard ProtPrep workflow, which adds hydrogens, assigns bond orders, and optimizes H-bond networks. Ramachandran plots confirmed appropriate protein backbone geometries (Figure S162).This step was followed by a standard receptor grid generation workflow, where the relative bound ligands (AMP-PMP, etoposide, ABI-274) were used as the center coordinate to produce a relative docking grid (10x10x10 Å). Once completed, the targets were now prepared for subsequent docking studies. The various ligands of interest: 20, 22, 24, 26, 27, 33, 35, 37, 38, 41 (and 26_tet, 27_tet, 33_tet tautomers) were manually drawn using the Maestro 2D sketcher module before a LigPrep workflow, involving low energy minimizations, Epik ionization step (pH 7.00 ± 2.00), adding hydrogens, assigning bond orders, checking tautomers, and generating relevant physiological states.

At this stage, the prepared ligands underwent a standard Glide docking workflow using Maestro’s OPLS force-field (Extra Precision) looking at the top 10 binding poses across the generated grids of TopII (catalytic site), TopII (DNA interface), and Tubulin (colchicine-binding site). In each case, a quantitative docking score (in kcal/mol) was calculated to prioritize ligands. This was followed by visual inspection of poses to analyze intermolecular forces driving molecular recognition. A doxorubicin control was used in all dockings against the 3 targets.

**TopII-DNA (3QX3)**

**Tubulin (6PC4)**

**TopII (1ZXM)**

**Figure S163:** Ramachandran plots of TopII ATPase (1ZXM), TopII-DNA (3QX3), and Tubulin (6PC4) highlighting optimal protein preparation via phi/psi angles. In all three cases, >95% of residues are in the allowed regions. Any residue outside represents flexible amino acids: Gly, Pro, Pre-Pro, Pre-Gly.

**Figure S164:** Docking scores of ligands against TopII (1ZXM), TopII-DNA (3QX3), and tubulin (6PC4).
